# Supplementary material for: Photoredox-catalyzed coupling of aryl sulfonium salts with CO2and amines to accessO-aryl carbamates
Source: Royal Society of Chemistry journal article supplement (doi:10.1039/d2cc06033g), 2022-12-13

# Supporting Information

## Photoredox-catalyzed coupling of aryl sulfonium salts with CO<sub>2</sub> and amines to access *O*-aryl carbamates

Yanhui Guo, Li Wei, Zhonglin Wen, Huanfeng Jiang and Chaorong Qi\*

*Key Lab of Functional Molecular Engineering of Guangdong Province, School of Chemistry and Chemical Engineering, South China University of Technology, Guangzhou 510641, China*

*E-mail: crqi@scut.edu.cn*

### List of Contents

|                                                                                    |     |
|------------------------------------------------------------------------------------|-----|
| A. General methods .....                                                           | S2  |
| B. The preparation of aryl sulfonium salts <b>1</b> .....                          | S2  |
| C. General procedure for the synthesis of <i>O</i> -aryl carbamates <b>3</b> ..... | S3  |
| D. Optimization of the reaction conditions .....                                   | S4  |
| E. Larger scale synthesis and applications of <b>3aa</b> .....                     | S8  |
| F. Control experiments .....                                                       | S10 |
| G. Cyclic voltammetry .....                                                        | S10 |
| H. Stern-Volmer fluorescence quenching experiments .....                           | S11 |
| I. Analytical data .....                                                           | S13 |
| J. References.....                                                                 | S22 |
| K. NMR Spectra .....                                                               | S23 |

## A. General methods

All aryl sulfonium salts **1** were synthesized according to previously described methods.<sup>1</sup> Other reagents were purchased from commercial sources and used directly without further treatment. <sup>1</sup>H and <sup>13</sup>C NMR spectra were recorded in 400 MHz apparatus and using CDCl<sub>3</sub> as solvent and TMS as an internal standard. The chemical shifts are referenced to signals at 7.26 and 77.0 ppm, respectively. The data of HRMS was determined on a high-resolution mass spectrometer (LCMS-IT-TOF). IR spectra were obtained either as potassium bromide plates or as liquid films between two potassium bromide plates with a Bruker TENSOR 27 spectrometer. Melting points were determined with a Büchi Melting Point B-545 instrument are uncorrected. Photoluminescence spectra were recorded on a Horiba Fluoromax-4 spectrofluorometer. Blue LED (30 W, λ<sub>max</sub> = 450 nm) powered by Constant Current Modules were used for the light irradiation. The light source was placed ~ 10 mm from the reaction tube. The photoreactor was placed in an incubator, which was used to maintain the temperature at room temperature (25 °C).

## B. The preparation of aryl sulfonium salts **1**

Aryl sulfonium salts **1a-1m** were prepared according to the previous reports.<sup>1-2</sup>

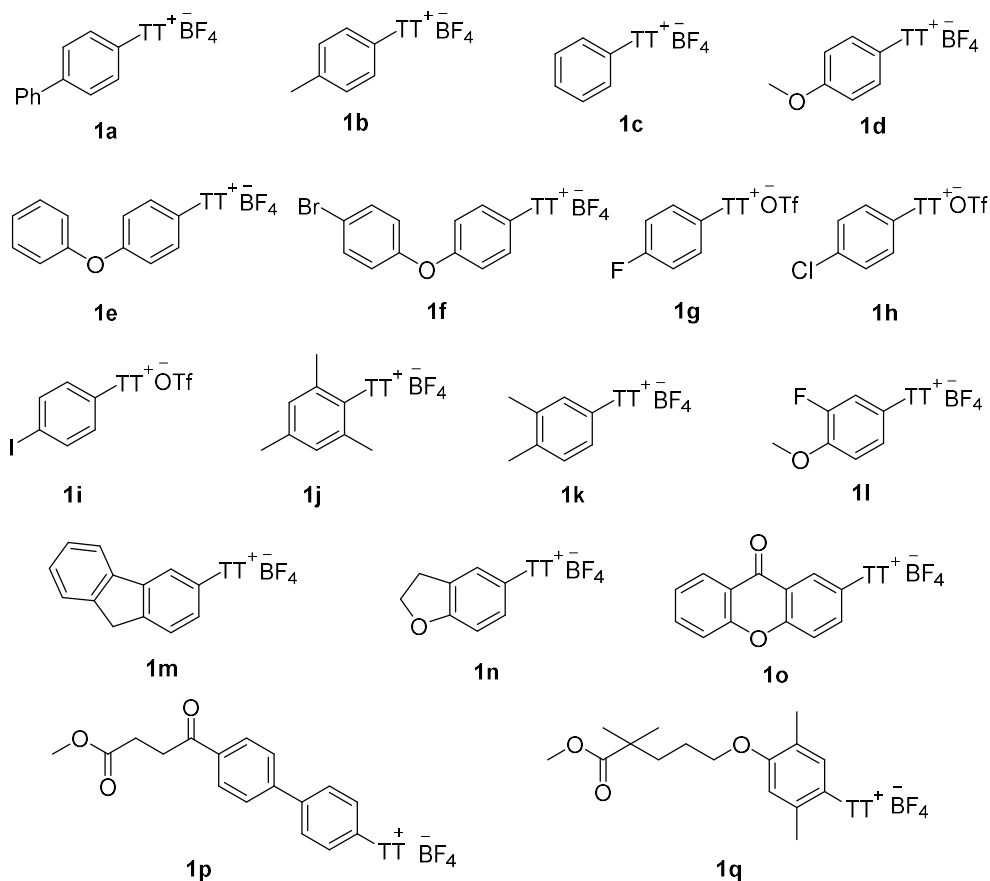

The typical procedure for the preparation of aryl sulfonium salt **1a** was as follows:

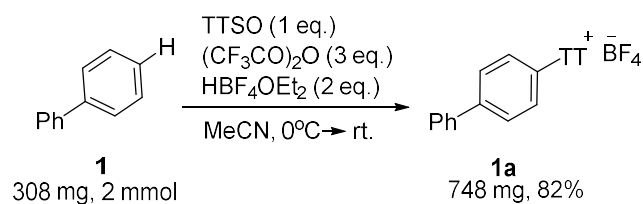

Under an ambient atmosphere, a 20 ml round bottom flask was charged with diphenyl **1** (308 mg, 2.00 mmol, 1.00 equiv) and MeCN (2.0 ml,  $c = 1.0$  M). After cooling to 0 °C, HBF<sub>4</sub>·OEt<sub>2</sub> (0.55 mL, 647 mg, 4.0 mmol, 2.0 equiv) and thianthrene-S-oxide (TTSO) (464 mg, 2.00 mmol, 1.00 equiv) was added to the vial while stirring the mixture, leading to a suspension. Then trifluoroacetic anhydride (0.84 mL, 1.24 g, 6 mmol, 3.0 equiv) was added in one portion at 0 °C, resulting in a color change to deep purple. Subsequently, the reaction mixture was allowed to reach room temperature and stirred for 12 h. The solution was diluted with DCM (5 mL) and poured onto a mixture of DCM (10 mL) and saturated aqueous NaHCO<sub>3</sub> solution (5 mL). After stirring for 5 min at 23 °C, the mixture was poured into a separating funnel, and the layers were separated. The DCM layer was washed with aqueous NaBF<sub>4</sub> solution (10% w/w, 4 × ca. 20 mL). The DCM layer was dried over Na<sub>2</sub>SO<sub>4</sub>, filtered, and the solvent was removed under reduced pressure. The residue was purified by chromatography on silica gel eluting with DCM/MeOH (30:1 (v/v)), then the solvent was removed in vacuo to afford the thianthrenium salt **1a** (748 mg, 82%).

### C. General procedure for the synthesis of *O*-aryl carbamates **3**

In a nitrogen-filled glovebox, an oven dried Schlenk tube (25 ml) was charged with the mixture of Ir[(dtbbpy)(ppy)<sub>2</sub>][PF<sub>6</sub>] (0.007 mmol), Cu(MeCN)<sub>4</sub>PF<sub>6</sub> (0.3 mmol), aryl sulfonium salts **1** (0.1 mmol), DABCO (0.5 mmol), BF<sub>3</sub>·OEt<sub>2</sub> (0.55 mmol), 4Å MS (20 mg), MeCN (1.5 ml), and a magnetic stirring bar. The tube was then evacuated, refilled with CO<sub>2</sub> (1 atm) three times, and charged with 0.2 mmol of amine **2** via a syringe. The reaction mixture was stirred at room temperature for 2 h under 30 W blue LED irradiation. After the reaction was completed, the tube was removed from the light source. The reaction mixture was quenched with saturated brine water (5 mL), then extracted with ethyl acetate (3 × 10 mL) three times, the organic layer was dried over anhydrous Na<sub>2</sub>SO<sub>4</sub>. The organic layer was filtered and concentrated under reduced pressure. The crude residue was separated by column chromatography on a silica gel column using petroleum ether/ethyl acetate as eluent to give the desired product **3**.

## D. Optimization of the reaction conditions

**Table S1** Optimization of the reaction conditions<sup>a</sup>

$\text{1a} + \text{CO}_2 + \text{2a} \xrightarrow[\text{DABCO (5 eq.), BF}_3 \cdot \text{OEt}_2 \text{ (5.5 eq.)}]{\text{Ir}[(\text{dtbbpy})(\text{ppy})_2]\text{PF}_6 \text{ (7 mol\%)}  
\text{Cu}[\text{MeCN}]_4\text{PF}_6 \text{ (3 eq.)}]$ 
 $\text{3aa}$

TT =

| Entry | Variation from the “standard” conditions                                         | Yield of <b>3aa</b> (%) <sup>b</sup> |
|-------|----------------------------------------------------------------------------------|--------------------------------------|
| 1     | none                                                                             | 73 (69) <sup>b</sup>                 |
| 2     | No Ir[(dtbbpy)(ppy) <sub>2</sub> ] <sub>2</sub> PF <sub>6</sub>                  | 0                                    |
| 3     | No Cu(MeCN) <sub>4</sub> PF <sub>6</sub>                                         | 0                                    |
| 4     | No light                                                                         | 0                                    |
| 5     | No DABCO                                                                         | 0                                    |
| 6     | No BF <sub>3</sub> ·OEt <sub>2</sub>                                             | 33                                   |
| 7     | Ir(ppy) <sub>3</sub> as photocatalyst                                            | 53                                   |
| 8     | Ir[dF(CF <sub>3</sub> )ppy <sub>2</sub> ](dtbpy)PF <sub>6</sub> as photocatalyst | 41                                   |
| 9     | CuI instead of Cu(MeCN) <sub>4</sub> PF <sub>6</sub>                             | 15                                   |
| 10    | Cu(OAc) <sub>2</sub> instead of Cu(MeCN) <sub>4</sub> PF <sub>6</sub>            | 8                                    |
| 11    | Et <sub>3</sub> N instead of DABCO                                               | trace                                |
| 12    | DMP instead of DABCO                                                             | 38                                   |
| 13    | Quinuclidine instead of DABCO                                                    | 66                                   |
| 14    | CH <sub>2</sub> Cl <sub>2</sub> instead of MeCN                                  | 0                                    |
| 15    | PhCN instead of MeCN                                                             | 58                                   |

<sup>a</sup>Reaction conditions: **1a** (0.1 mmol), **2a** (0.2 mmol), CO<sub>2</sub> (1 atm), Ir[(dtbbpy)(ppy)<sub>2</sub>]<sub>2</sub>PF<sub>6</sub> (7 mol%), Cu(MeCN)<sub>4</sub>PF<sub>6</sub> (0.3 mmol), DABCO (0.5 mmol), BF<sub>3</sub>·OEt<sub>2</sub> (0.55 mmol) and 4Å MS (20 mg) in MeCN (1.5 mL) at 25 °C, irradiation with 30 W blue LED for 2 h. <sup>b</sup>Yields were determined by GC-MS analysis with *n*-dodecane as internal standard; number in parentheses is the yield of isolated product. DMP = N, N'-Dimethylpiperazine.

**Table S2** The influence of different photocatalysts on the reaction<sup>a</sup>

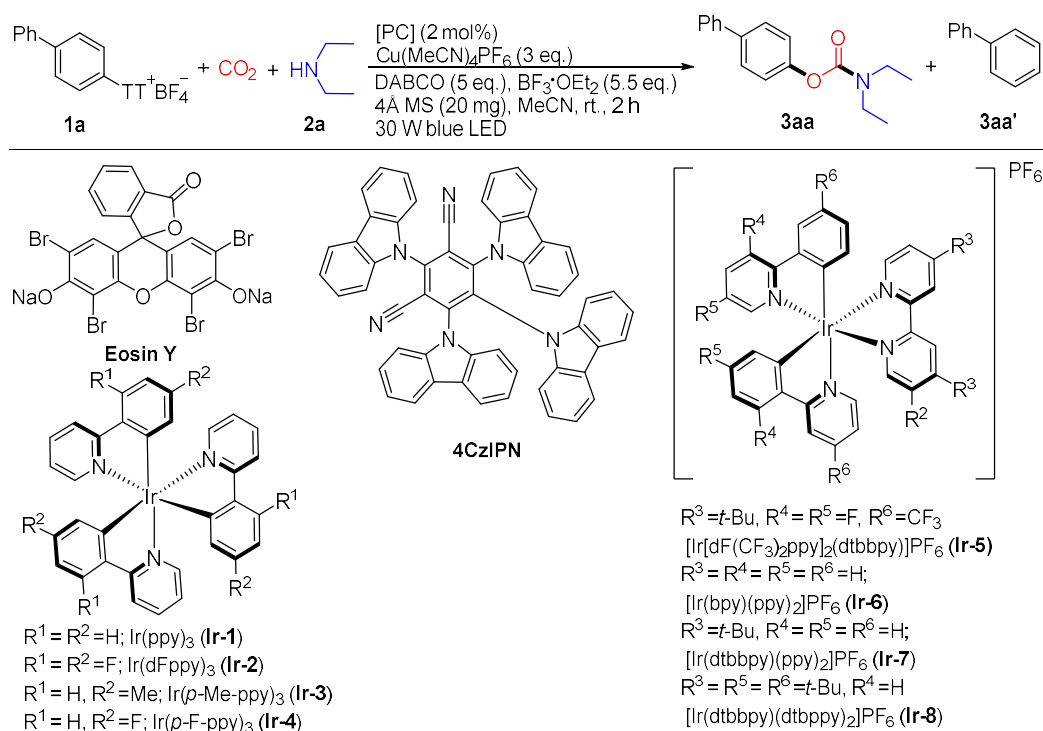

| Entry           | [PC]                                                 | 3aa yield (%) <sup>b</sup> | 3aa' yield (%) <sup>b</sup> |
|-----------------|------------------------------------------------------|----------------------------|-----------------------------|
| 1               | Ru[(bpy) <sub>3</sub> PF <sub>6</sub> ] <sub>2</sub> | 35                         | 27                          |
| 2               | Ru(bpy) <sub>3</sub> Cl <sub>2</sub>                 | 29                         | 15                          |
| 3               | Eosin Y                                              | 0                          | 0                           |
| 4               | 4CZIPN                                               | 0                          | 0                           |
| 5               | [Ir]-1                                               | 45                         | 18                          |
| 6               | [Ir]-2                                               | 33                         | 15                          |
| 7               | [Ir]-3                                               | 28                         | 17                          |
| 8               | [Ir]-4                                               | 35                         | 15                          |
| 9               | [Ir]5                                                | 38                         | 17                          |
| 10              | [Ir]-6                                               | 54                         | 12                          |
| 11              | [Ir]-7                                               | 60                         | 10                          |
| 12              | [Ir]-8                                               | 58                         | 14                          |
| 13 <sup>c</sup> | [Ir]-7                                               | 73 (69) <sup>d</sup>       | 8                           |

<sup>a</sup>Reaction conditions: **1a** (0.1 mmol), **2a** (0.2 mmol) and CO<sub>2</sub> (1 atm), [PC] (0.002 mmol), Cu(MeCN)<sub>4</sub>PF<sub>6</sub> (0.3 mmol), DABCO (0.5 mmol), BF<sub>3</sub>·OEt<sub>2</sub> (0.55 mmol) and 4 Å MS (20 mg) in MeCN (1.5 mL) at 25 °C irradiation with 30 W blue LED for 2 h. <sup>b</sup>GC yield with dodecane as internal standard. <sup>c</sup>[PC] (0.007 mmol). <sup>d</sup>Yields of isolated product.

**Table S3** The influence of different copper salts on the reaction<sup>a</sup>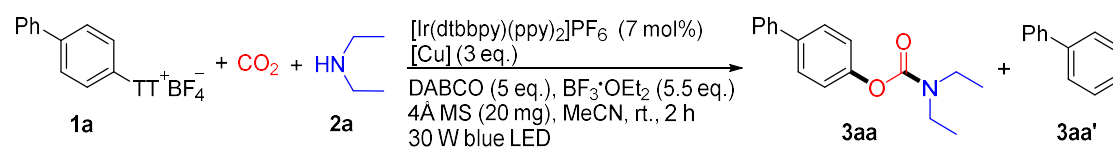

| Entry           | [Cu]                                  | 3aa yield (%) <sup>b</sup> | 3aa' yield (%) <sup>b</sup> |
|-----------------|---------------------------------------|----------------------------|-----------------------------|
| 1               | Cu <sub>2</sub> O                     | 0                          | 60                          |
| 2               | CuI                                   | 15                         | 20                          |
| 3               | Cu(MeCN) <sub>4</sub> PF <sub>6</sub> | 73                         | 8                           |
| 4               | Cu(MeCN) <sub>4</sub> OTf             | 60                         | 15                          |
| 5               | Cu(OAc) <sub>2</sub>                  | 8                          | 35                          |
| 6               | CuSO <sub>4</sub>                     | trace                      | 30                          |
| 7 <sup>c</sup>  | Cu(MeCN) <sub>4</sub> PF <sub>6</sub> | 17                         | 50                          |
| 8 <sup>d</sup>  | Cu(MeCN) <sub>4</sub> PF <sub>6</sub> | 36                         | 42                          |
| 9 <sup>e</sup>  | Cu(MeCN) <sub>4</sub> PF <sub>6</sub> | 60                         | 25                          |
| 10 <sup>f</sup> | Cu(MeCN) <sub>4</sub> PF <sub>6</sub> | 75                         | 11                          |

<sup>a</sup>Reaction conditions: **1a** (0.1 mmol), **2a** (0.2 mmol) and CO<sub>2</sub> (1 atm), Ir[(dtbbpy)(ppy)<sub>2</sub>]PF<sub>6</sub> (0.007 mmol), [Cu] (0.3 mmol), DABCO (0.5 mmol), BF<sub>3</sub>·OEt<sub>2</sub> (0.55 mmol) and 4 Å MS (20 mg) in MeCN (1.5 mL) at 25 °C irradiation with 30 W blue LED for 2 h. <sup>b</sup>GC yield with dodecane as internal standard. <sup>c</sup>[Cu] (0.05 mmol). <sup>d</sup>[Cu] (0.1 mmol). <sup>e</sup>[Cu] (0.2 mmol). <sup>f</sup>[Cu] (0.4 mmol).

**Table S4** The influence of different bases on the reaction<sup>a</sup>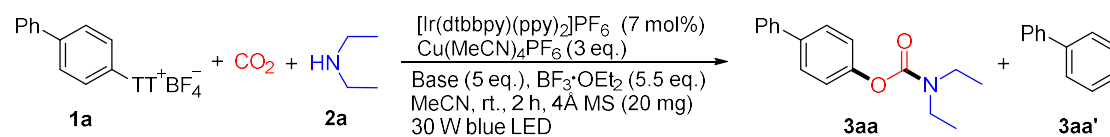

| Entry           | Base                           | 3aa yield (%) <sup>b</sup> | 3aa' yield (%) <sup>b</sup> |
|-----------------|--------------------------------|----------------------------|-----------------------------|
| 1               | DBN                            | Trace                      | 36                          |
| 2               | DMP                            | 38                         | 24                          |
| 3               | DABCO                          | 73                         | 8                           |
| 4               | Et <sub>3</sub> N              | Trace                      | 35                          |
| 5               | Quinuclidine                   | 66 (61) <sup>c</sup>       | 12                          |
| 6               | DIPEA                          | 10                         | 15                          |
| 7               | K <sub>2</sub> CO <sub>3</sub> | Trace                      | Trace                       |
| 8               | PPh <sub>3</sub>               | ND                         | Trace                       |
| 9               | NPh <sub>3</sub>               | ND                         | Trace                       |
| 10 <sup>d</sup> | DABCO                          | 12                         | 20                          |
| 11 <sup>e</sup> | DABCO                          | 30                         | 15                          |
| 12 <sup>f</sup> | DABCO                          | 45                         | 11                          |
| 13 <sup>g</sup> | DABCO                          | 56                         | 12                          |
| 14 <sup>h</sup> | DABCO                          | 68                         | 10                          |
| 15 <sup>i</sup> | DABCO                          | 75                         | 9                           |

<sup>a</sup>Reaction conditions: **1a** (0.1 mmol), **2a** (0.2 mmol) and CO<sub>2</sub> (1 atm), Ir[(dtbbpy)(ppy)<sub>2</sub>]PF<sub>6</sub> (0.007 mmol), Cu(MeCN)<sub>4</sub>PF<sub>6</sub> (0.3 mmol), base (0.5 mmol), BF<sub>3</sub>·OEt<sub>2</sub> (0.55 mmol) and 4 Å MS (20 mg) in MeCN (1.5 mL) at 25 °C irradiation with 30 W blue LED for 2 h. <sup>b</sup>GC yield with dodecane as internal standard. <sup>c</sup>Yields of isolated products. <sup>d</sup>DABCO (0.05 mmol). <sup>e</sup>DABCO (0.1 mmol). <sup>f</sup>DABCO (0.2 mmol). <sup>g</sup>DABCO (0.3 mmol). <sup>h</sup>DABCO (0.4 mmol). <sup>i</sup>DABCO (0.6 mmol).

**Table S5** The influence of different solvents on the reaction<sup>a</sup>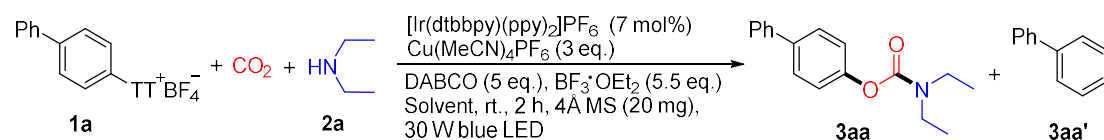

| Entry | Solvent                  | <b>3aa</b> yield (%) <sup>a</sup> | <b>3aa'</b> yield (%) <sup>a</sup> |
|-------|--------------------------|-----------------------------------|------------------------------------|
| 1     | MeCN                     | 73                                | 8                                  |
| 2     | DMF                      | 0                                 | 45                                 |
| 3     | DMSO                     | 0                                 | 37                                 |
| 4     | THF                      | 0                                 | 55                                 |
| 5     | PhCN                     | 58                                | 12                                 |
| 6     | $\text{CH}_2\text{Cl}_2$ | 0                                 | 52                                 |

Reaction conditions: **1a** (0.1 mmol), **2a** (0.2 mmol) and  $\text{CO}_2$  (1 atm),  $[\text{Ir}(\text{dtbbpy})(\text{ppy})_2]\text{PF}_6$  (0.007 mmol),  $\text{Cu}(\text{MeCN})_4\text{PF}_6$  (0.3 mmol), DABCO (0.5 mmol),  $\text{BF}_3 \cdot \text{OEt}_2$  (0.55 mmol) and 4 Å MS (20 mg) in Solvent (1.5 mL) at 25 °C irradiation with 30 W blue LED for 2 h. <sup>a</sup>GC yield with dodecane as internal standard.

## E. Larger scale synthesis and applications of **3aa**

### a) 1 mmol-scale experiment

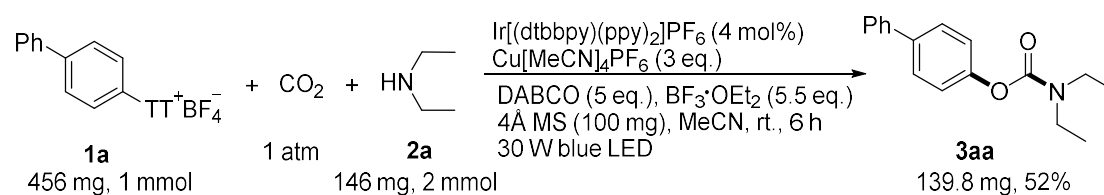

In a nitrogen-filled glovebox, an oven dried Schlenk tube (100 ml) was charged with the mixture of  $[\text{Ir}(\text{dtbbpy})(\text{ppy})_2]\text{PF}_6$  (0.04 mmol),  $\text{Cu}(\text{MeCN})_4\text{PF}_6$  (3 mmol), aryl sulfonium salts **1a** (456mg, 1 mmol), DABCO (5 mmol),  $\text{BF}_3 \cdot \text{OEt}_2$  (5.5 mmol), 4Å MS (100 mg), MeCN (15 ml), and a magnetic stirring bar. The tube was then evacuated, refilled with  $\text{CO}_2$  (1 atm) three times, and charged further with 2 mmol of amine **2a** via a syringe. The reaction mixture was stirred at room temperature for 6 h under 30 W blue LED irradiation. After the reaction was completed, the tube was removed from the light source. The reaction mixture was quenched with saturated brine water (15 mL), then extracted with ethyl acetate (3 × 20 mL) three times, the organic layer was dried over anhydrous



Na<sub>2</sub>SO<sub>4</sub>. The organic layer was filtered and concentrated under reduced pressure, the crude residue was separated by column chromatography on a silica gel column using petroleum ether/ethyl acetate(v/v=15:1) as eluent to give the desired product **3aa** (139.8 mg, 52%).

b) The synthesis of 4-phenylphenol **4aa**

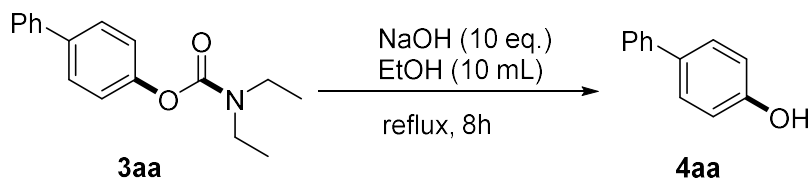

To a 25 mL round-bottom flask were added **3aa** (0.2 mmol), NaOH (10 eq.), EtOH (10 mL), then attach a reflux condenser to the flask. The reaction mixture was stirred at 78°C for 8 h. After cooling to room temperature, the solvent was removed under reduced pressure, the crude residue was separated by column chromatography on a silica gel column using petroleum ether/ethyl acetate(v/v=10:1) as eluent to give the desired product **4aa** (27.9 mg, 82%).

c) The synthesis of acylated product **4ab**

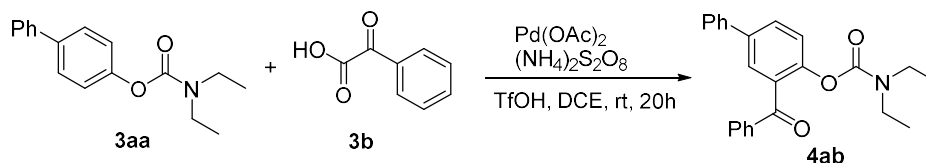

To an oven-dried sealed tube charged with [1,1'-biphenyl]-4-yl diethylcarbamate (**3aa**) (40.4 mg, 0.15 mmol, 1.0 equiv.), Pd(OAc)<sub>2</sub> (1.7 mg, 0.0075 mmol, 5 mol%), (NH<sub>4</sub>)<sub>2</sub>S<sub>2</sub>O<sub>8</sub> (51.3 mg, 0.23 mmol, 1.5 equiv.), and phenylglyoxylic acid (**3b**) (45.3 mg, 0.3 mmol, 2 equiv.) in DCE (2 mL) was added TfOH (3 μL, 20 mol%). The reaction mixture was allowed to stir at room temperature for 20 h. Then the reaction mixture was diluted with EtOAc (5 mL) and washed with a saturated solution of Na<sub>2</sub>CO<sub>3</sub>. The aqueous layer was extracted with EtOAc (10 mL × 3). The combined organic layer was dried over Mg<sub>2</sub>SO<sub>4</sub> and concentrated under vacuum. The residue was purified by silica gel column chromatography (petroleum ether/ethyl acetate (v/v=10:1)) to afford product **4ab** (34.7 mg, 62%).

## F. Control experiments

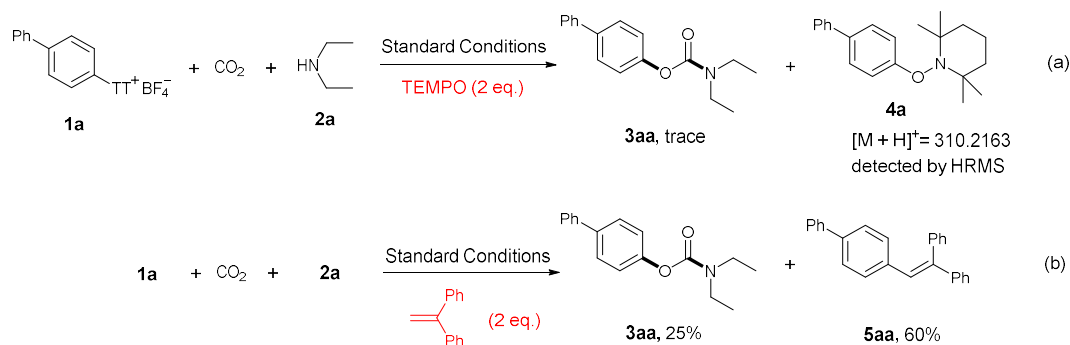

**Scheme S1.** Reaction conditions: (a) **1a** (0.1 mmol), **2a** (0.2 mmol) and  $\text{CO}_2$  (1 atm),  $\text{Ir}[(\text{dtbbpy})(\text{ppy})_2]\text{PF}_6$  (0.07 mmol),  $\text{Cu}(\text{MeCN})_4\text{PF}_6$  (0.3 mmol), DABCO (0.5 mmol),  $\text{BF}_3\cdot\text{OEt}_2$  (0.55 mmol), 4 Å MS (20 mg) and TEMPO (0.2 mmol) in MeCN (1.5 mL) at 25 °C irradiation with 30 W blue LED for 2 h. (b) **1a** (0.1 mmol), **2a** (0.2 mmol) and  $\text{CO}_2$  (1 atm),  $\text{Ir}[(\text{dtbbpy})(\text{ppy})_2]\text{PF}_6$  (0.07 mmol),  $\text{Cu}(\text{MeCN})_4\text{PF}_6$  (0.3 mmol), DABCO (0.5 mmol),  $\text{BF}_3\cdot\text{OEt}_2$  (0.55 mmol), 4 Å MS (20 mg) and diphenylethylene (0.2 mmol) in MeCN (1.5 mL) at 25 °C irradiation with 30 W blue LED for 2 h.

## G. Cyclic voltammetry

Cyclic voltammetry test was performed in a three-electrode cell under nitrogen at room temperature. All cyclic voltammograms were measured using a saturated calomel electrode (SCE) as reference electrode, a platinum (Pt) wire counter electrode and a glassy carbon working electrode. The conditions of the experiments were as follows: testing compounds are in solution of 0.1 M tetrabutylammonium tetrafluoroborate ( $n\text{Bu}_4\text{NBF}_4$ ) in MeCN at a scan rate of 100 mV/s; Prior to each measurement, solutions were purged with nitrogen ( $\text{N}_2$ ) for 5 minutes to ensure the oxygen-free conditions.

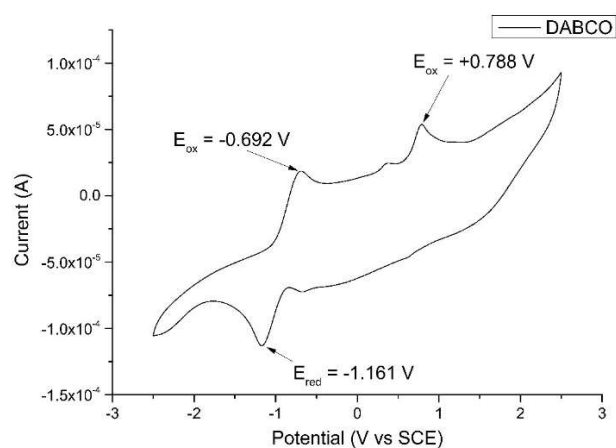

**Figure S2.** Cyclic voltammetry of DABCO (0.01 M) in MeCN (vs SCE) with  $n\text{Bu}_4\text{NBF}_4$  (0.1 M) under nitrogen at a glassy carbon electrode at a scan rate of 100 mV/s. The oxidation and reduction potential of DABCO in MeCN was measured as -0.692 V, +0.788 V and -1.161 V (vs SCE), respectively.

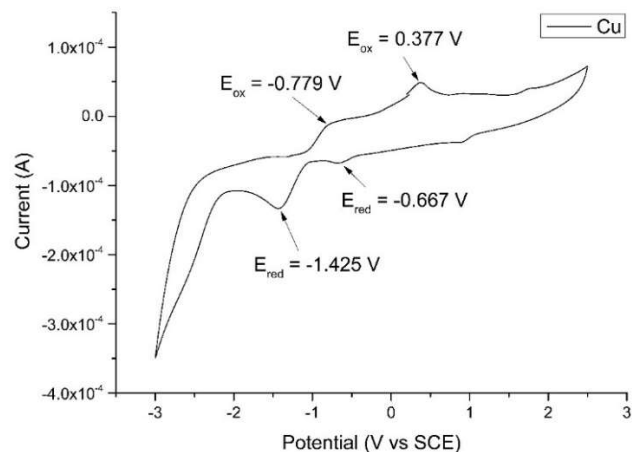

**Figure S3.** Cyclic voltammetry of  $\text{Cu}(\text{MeCN})_4\text{PF}_6$  (0.01 M) in MeCN (vs SCE) with  $n\text{Bu}_4\text{NBF}_4$  (0.1 M) under nitrogen at a glassy carbon electrode at a scan rate of 100 mV/s. The oxidation and reduction potential of  $\text{Cu}(\text{MeCN})_4\text{PF}_6$  in MeCN was measured as -0.779 V, +0.377 V and -1.425 V, -0.667 V (vs SCE), respectively.

## H. Stern-Volmer fluorescence quenching experiments

Fluorescence spectra were collected on Horiba Fluoromax-4 spectrofluorometer. Samples for the quenching experiments were prepared in a 4 mL glass cuvette with a septum screw cap.  $\text{Ir}[(\text{dtbbpy})(\text{ppy})_2]\text{PF}_6$  was irradiated at 380 nm and the emission intensity at 585 nm was observed. In a typical experiment, the emission spectrum of a  $5.0 \times 10^{-5}$  M solution of  $\text{Ir}[(\text{dtbbpy})(\text{ppy})_2]\text{PF}_6$  in MeCN was collected. Then, appropriate amount of quencher was added to the measured solution and the emission spectrum of the sample was collected. Here  $I_0$  and  $I$  represent the intensities of the emission in the absence and presence of the quencher.

Stern-Volmer equation:  $I_0/I = 1 + K_q\tau_0[Q]$ ,  $\tau_0 = 0.60 \mu\text{s}$  (ref.2)

| Quencher | $K_q / \text{M}^{-1}\text{S}^{-1}$ |
|----------|------------------------------------|
| DABCO    | $4.2 \times 10^8$                  |
| ArTT     | $5.7 \times 10^7$                  |
| [Cu]     | $1.1 \times 10^7$                  |

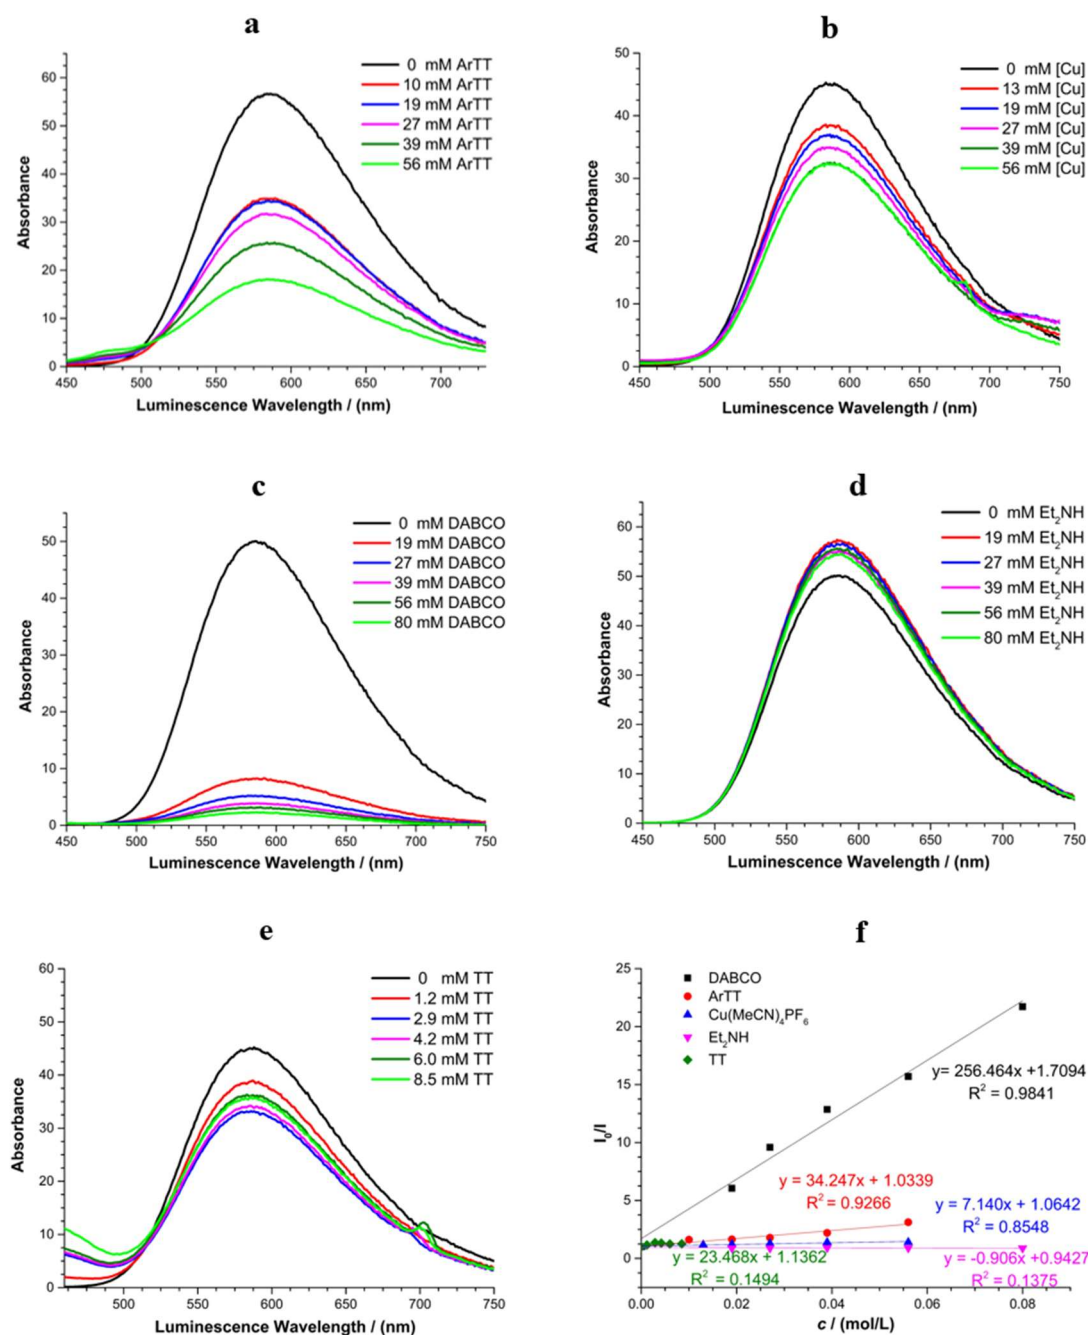

**Figure S4.** The emission quenching of Ir[(dtbbpy)(ppy)<sub>2</sub>]PF<sub>6</sub>. a) Steady-state Stern–Volmer experiment of ArTT-1a. b) Stern–Volmer fluorescence quenching experiments of Cu(MeCN)<sub>4</sub>PF<sub>6</sub>. c) Steady-state Stern–Volmer experiment of DABCO. d) Steady-state Stern–Volmer experiment of Et<sub>2</sub>NH. e) Steady-state Stern–Volmer experiment of TT. f) Stern–Volmer fluorescence quenching experiments using Ir[(dtbbpy)(ppy)<sub>2</sub>]PF<sub>6</sub> with ArTT-1a, Cu(MeCN)<sub>4</sub>PF<sub>6</sub>, DABCO, Et<sub>2</sub>NH and TT.

## I. Analytical data

### [1,1'-Biphenyl]-4-yl diethylcarbamate (3aa)

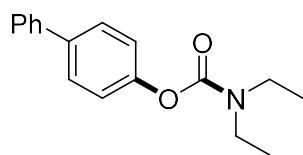

Yield: 18.6 mg (69%); Pale yellow oil;  $^1\text{H NMR}$  (400 MHz,  $\text{CDCl}_3$ ):

$\delta = 7.65 - 7.57$  (m, 4 H), 7.46 (t,  $J = 7.6$  Hz, 2 H), 7.40 – 7.34 (m, 1 H), 7.27 – 7.21 (m, 2 H), 3.59 – 3.36 (m, 4 H), 1.37 – 1.17 (m, 6 H);

$^{13}\text{C NMR}$  (100 MHz,  $\text{CDCl}_3$ ):  $\delta = 154.3, 151.0, 140.7, 138.2, 128.8, 128.0, 127.2, 127.1, 122.1, 42.3, 41.9, 14.3, 13.5$ ; IR (KBr): 3052, 2972, 1719, 1605, 1471, 1420, 1275, 1212, 1162, 1089, 953, 865, 762, 699, 506  $\text{cm}^{-1}$ ; HRMS-ESI ( $m/z$ ): calcd for  $\text{C}_{17}\text{H}_{20}\text{NO}_2$  [ $\text{M} + \text{H}$ ] $^+$ : 270.1489, found: 270.1484.

### [1,1'-Biphenyl]-4-yl dimethylcarbamate (3ab)

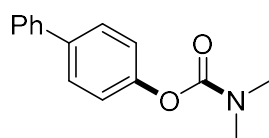

Yield: 10.8 mg (45%); Pale yellow oil;  $^1\text{H NMR}$  (400 MHz,  $\text{CDCl}_3$ ):  $\delta =$

7.62 – 7.56 (m, 4 H), 7.45 (t,  $J = 7.6$  Hz, 2 H), 7.39 – 7.33 (m, 1 H), 7.23 – 7.18 (m, 2 H), 3.15 (s, 3 H), 3.06 (s, 3 H);  $^{13}\text{C NMR}$  (100 MHz,  $\text{CDCl}_3$ ):

$\delta = 155.0, 151.0, 140.6, 138.3, 128.8, 128.0, 127.2, 127.1, 122.0, 36.8, 36.5$ ; IR (KBr): 2937, 2831, 1721, 1610, 1473, 1370, 1182, 862, 761, 481  $\text{cm}^{-1}$ ; HRMS-ESI ( $m/z$ ): calcd for  $\text{C}_{15}\text{H}_{16}\text{NO}_2$  [ $\text{M} + \text{H}$ ] $^+$ : 242.1176, found: 242.1173.

### [1,1'-Biphenyl]-4-yl dipropylcarbamate (3ac)

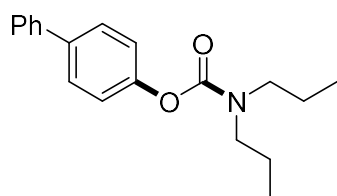

Yield: 19.0 mg (64%); Pale yellow oil;  $^1\text{H NMR}$  (400 MHz,

$\text{CDCl}_3$ ):  $\delta = 7.63 - 7.56$  (m, 4H), 7.49 – 7.42 (m, 2H), 7.39 – 7.33 (m, 1H), 7.24 – 7.19 (m, 2H), 3.40 (t, 2H), 3.33 (t, 2H), 1.82 – 1.60 (m, 4H), 1.07 – 0.89 (m, 6H);  $^{13}\text{C NMR}$  (100 MHz,  $\text{CDCl}_3$ ):

$\delta = 154.7, 151.1, 140.7, 138.2, 128.8, 128.0, 127.2, 127.1, 122.0, 49.6, 49.3, 22.1, 21.3, 11.3$ ; IR (KBr): 3049, 2970, 2880, 1719, 1621, 1469, 1417, 1215, 1158, 1009, 855, 758, 697, 506  $\text{cm}^{-1}$ ; HRMS-ESI ( $m/z$ ): calcd for  $\text{C}_{19}\text{H}_{24}\text{NO}_2$  [ $\text{M} + \text{H}$ ] $^+$ : 298.1802, found: 298.1799.

### [1,1'-Biphenyl]-4-yl dibutylcarbamate (3ad)

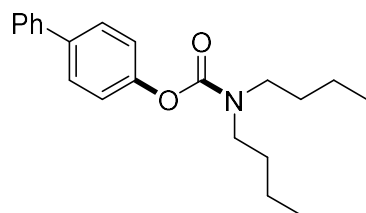

Yield: 18.9 mg (58%); Pale yellow oil;  $^1\text{H NMR}$  (400 MHz,

$\text{CDCl}_3$ ):  $\delta = 7.64 - 7.56$  (m, 4 H), 7.46 (t,  $J = 7.6$  Hz, 2 H), 7.36 (t,  $J = 7.4$  Hz, 1 H), 7.26 – 7.16 (m, 2 H), 3.43 (t, 2 H), 3.36 (t, 2 H), 1.76 – 1.58 (m, 4 H), 1.50 – 1.28 (m, 4 H), 1.00 (q,  $J = 7.6$

Hz, 6 H);  $^{13}\text{C}$  NMR (100 MHz,  $\text{CDCl}_3$ ):  $\delta = 154.7, 151.1, 140.7, 138.2, 128.8, 128.0, 127.2, 127.1, 122.0, 47.6, 47.3, 31.0, 30.2, 20.1, 13.9$ ; IR (KBr): 3054, 2945, 2870, 1719, 1629, 1471, 1296, 1208, 1003, 867, 756, 693  $\text{cm}^{-1}$ ; HRMS-ESI ( $m/z$ ): calcd for  $\text{C}_{21}\text{H}_{28}\text{NO}_2$  [ $\text{M} + \text{H}$ ] $^+$ : 326.2115, found: 326.2112.

**[1,1'-Biphenyl]-4-yl diisopropylcarbamate (3ae)**

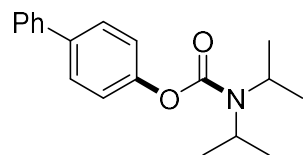

Yield: 15.1 mg (51%); Pale yellow oil;  $^1\text{H}$  NMR (400 MHz,  $\text{CDCl}_3$ ):  $\delta = 7.64 - 7.57$  (m, 4 H), 7.46 (t,  $J = 7.8$  Hz, 2 H), 7.37 (t,  $J = 7.4$  Hz, 1 H), 7.26 - 7.21 (m, 2 H), 4.08 (d,  $J = 41.6$  Hz, 2 H), 1.37 (s, 12 H);

$^{13}\text{C}$  NMR (100 MHz,  $\text{CDCl}_3$ ):  $\delta = 153.9, 150.9, 140.7, 138.2, 128.8, 128.0, 127.2, 127.1, 122.1, 47.0, 46.2, 21.5, 20.6$ ; IR (KBr): 2972, 2832, 1713, 1606, 1438, 1387, 1304, 1213, 1149, 998, 864, 763, 683, 613, 506  $\text{cm}^{-1}$ ; HRMS-ESI ( $m/z$ ): calcd for  $\text{C}_{19}\text{H}_{24}\text{NO}_2$  [ $\text{M} + \text{H}$ ] $^+$ : 298.1802, found: 298.1798.

**[1,1'-Biphenyl]-4-yl diisobutylcarbamate (3af)**

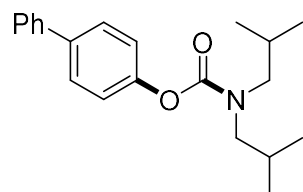

Yield: 13.7 mg (42%); Pale yellow oil;  $^1\text{H}$  NMR (400 MHz,  $\text{CDCl}_3$ ):  $\delta = 7.64 - 7.55$  (m, 4 H), 7.46 (t,  $J = 7.6$  Hz, 2 H), 7.36 (t,  $J = 7.2$  Hz, 1 H), 7.24 - 7.18 (m, 2 H), 3.29 (d,  $J = 7.6$  Hz, 2 H), 3.22 (d,  $J = 7.6$  Hz, 2 H), 2.20 - 1.99 (m, 2 H), 1.00 (dd,  $J = 14.2, J = 6.4$  Hz, 12 H);  $^{13}\text{C}$

NMR (100 MHz,  $\text{CDCl}_3$ ):  $\delta = 155.2, 151.1, 140.7, 138.2, 128.8, 128.0, 127.2, 127.1, 122.0, 55.4, 55.2, 27.6, 27.0, 20.2$ ; IR (KBr): 3048, 2957, 1721, 1621, 1470, 1422, 1215, 1161, 941, 854, 759, 694  $\text{cm}^{-1}$ ; HRMS-ESI ( $m/z$ ): calcd for  $\text{C}_{21}\text{H}_{28}\text{NO}_2$  [ $\text{M} + \text{H}$ ] $^+$ : 326.2115, found: 326.2111.

**[1,1'-Biphenyl]-4-yl dicyclohexylcarbamate (3ag)**

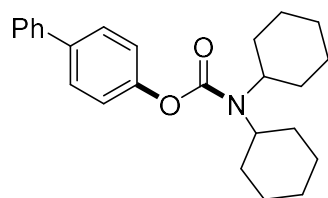

Yield: 19.2 mg (51%); Pale yellow oil;  $^1\text{H}$  NMR (400 MHz,  $\text{CDCl}_3$ ):  $\delta = 7.62 - 7.56$  (m, 4 H), 7.46 (t,  $J = 7.6$  Hz, 2 H), 7.39 - 7.33 (m, 1 H), 7.25 - 7.18 (m, 2 H), 3.86 - 3.31 (m, 2 H), 2.06 - 1.55 (m, 14 H), 1.37 (q,  $J = 12.8$  Hz, 4 H), 1.23 - 1.01 (m, 2 H);  $^{13}\text{C}$  NMR (100

MHz,  $\text{CDCl}_3$ ):  $\delta = 154.1, 151.0, 140.7, 138.1, 128.8, 128.0, 127.1, 122.2, 56.0, 31.8, 30.6, 26.3, 25.5$ ; IR (KBr): 3049, 2931, 2861, 1712, 1608, 1445, 1295, 1208, 993, 881, 758, 696, 499  $\text{cm}^{-1}$ ; HRMS-ESI ( $m/z$ ): calcd for  $\text{C}_{25}\text{H}_{32}\text{NO}_2$  [ $\text{M} + \text{H}$ ] $^+$ : 378.2428, found: 378.2421.

**[1,1'-Biphenyl]-4-yl bis(2-ethylhexyl)carbamate (3ah).**

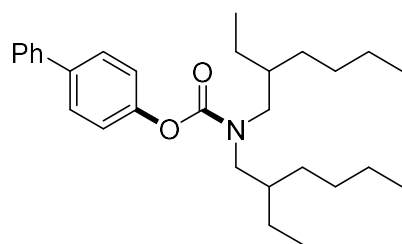

Yield: 25.3 mg (58%); Pale yellow oil;  $^1\text{H NMR}$  (400 MHz,  $\text{CDCl}_3$ ):  $\delta = 7.62 - 7.55$  (m, 4 H), 7.46 (t,  $J = 7.6$  Hz, 2 H), 7.39 – 7.33 (m, 1 H), 7.22 – 7.16 (m, 2 H), 3.40 – 3.25 (m, 4 H), 1.84 – 1.74 (m, 2 H), 1.50 – 1.24 (m, 16 H), 1.01 – 0.86 (m, 12 H);  $^{13}\text{C NMR}$  (100 MHz,  $\text{CDCl}_3$ ):  $\delta = 155.3, 151.1,$

140.7, 138.2, 128.8, 128.0, 127.2, 127.1, 121.9, 51.1, 50.9, 38.1, 37.4, 30.6, 28.8, 23.9, 23.8, 23.1, 14.1, 10.7, 10.7; IR (KBr): 3050, 2941, 1721, 1619, 1459, 1294, 1206, 1053, 853, 757, 700, 509  $\text{cm}^{-1}$ ; HRMS-ESI ( $m/z$ ): calcd for  $\text{C}_{29}\text{H}_{44}\text{NO}_2$  [ $\text{M} + \text{H}$ ] $^+$ : 438.3367, found: 438.3362.

**[1,1'-Biphenyl]-4-yl dibenzylcarbamate (3ai)**

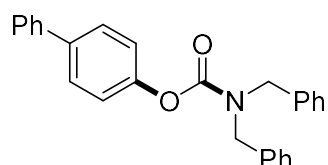

Yield: 19.7 mg (50%); Pale yellow oil;  $^1\text{H NMR}$  (400 MHz,  $\text{CDCl}_3$ ):  $\delta = 7.57$  (t,  $J = 7.8$  Hz, 4 H), 7.47 – 7.29 (m, 13 H), 7.22 (d,  $J = 8.8$  Hz, 2 H), 4.57 (d,  $J = 13.6$  Hz, 4 H);  $^{13}\text{C NMR}$  (100 MHz,  $\text{CDCl}_3$ ):

$\delta = 155.3, 150.9, 140.6, 138.6, 137.1, 137.0, 128.8, 128.5, 128.1, 127.7, 127.7, 127.7, 127.7, 127.6, 127.3, 127.2, 122.0, 50.0, 49.6$ . IR (KBr): 3046, 2942, 1720, 1626, 1452, 1300, 1204, 1078, 956, 868, 702, 509  $\text{cm}^{-1}$ ; HRMS-ESI ( $m/z$ ): calcd for  $\text{C}_{27}\text{H}_{24}\text{NO}_2$  [ $\text{M} + \text{H}$ ] $^+$ : 394.1802, found: 394.1796.

**[1,1'-Biphenyl]-4-yl pyrrolidine-1-carboxylate (3aj)**

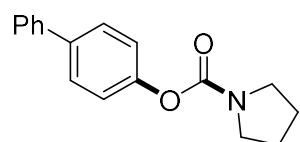

Yield: 10.4 mg (39%); Pale yellow oil;  $^1\text{H NMR}$  (400 MHz,  $\text{CDCl}_3$ ):  $\delta = 7.63 - 7.54$  (m, 4 H), 7.45 (t,  $J = 7.6$  Hz, 2 H), 7.39 – 7.32 (m, 1 H), 7.26 – 7.19 (m, 2 H), 3.61 (t,  $J = 6.6$  Hz, 2 H), 3.53 (t,  $J = 6.6$  Hz, 2 H),

2.06 – 1.91 (m, 4 H);  $^{13}\text{C NMR}$  (100 MHz,  $\text{CDCl}_3$ ):  $\delta = 153.2, 150.9, 140.7, 138.2, 128.8, 128.0, 127.2, 127.1, 122.0, 46.5, 46.4, 25.9, 25.0$ ; IR (KBr): 3064, 2961, 2883, 1720, 1620, 1492, 1399, 1190, 1063, 866, 760, 688  $\text{cm}^{-1}$ ; HRMS-ESI ( $m/z$ ): calcd for  $\text{C}_{17}\text{H}_{18}\text{NO}_2$  [ $\text{M} + \text{H}$ ] $^+$ : 268.1332, found: 268.1328.

**[1,1'-Biphenyl]-4-yl azepane-1-carboxylate (3ak)**

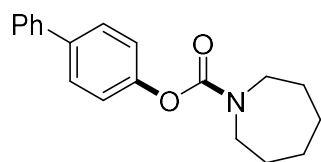

Yield: 13.9 mg (47%); Pale yellow oil;  $^1\text{H NMR}$  (400 MHz,  $\text{CDCl}_3$ ):  $\delta = 7.63 - 7.56$  (m, 4 H), 7.49 – 7.43 (m, 2 H), 7.39 – 7.34 (m, 1 H), 7.25 – 7.20 (m, 2 H), 3.63 (t,  $J = 6.0$  Hz, 2 H), 3.57 (t,  $J = 6.0$  Hz, 2 H),

1.91 – 1.76 (m, 4 H), 1.73 – 1.62 (m, 4 H);  $^{13}\text{C NMR}$  (100 MHz,  $\text{CDCl}_3$ ):  $\delta = 154.7, 151.1, 140.7, 138.2, 128.8, 128.0, 127.2, 127.1, 122.1, 47.5, 47.2, 28.7, 28.1, 27.5, 26.9$ ; IR (KBr): 3047,

2929, 2861, 1717, 1611, 1472, 1417, 1195, 1051, 953, 758, 698, 509  $\text{cm}^{-1}$ ; HRMS-ESI ( $m/z$ ): calcd for  $\text{C}_{19}\text{H}_{22}\text{NO}_2$  [ $\text{M} + \text{H}$ ] $^+$ : 296.1645, found: 296.1642.

**[1,1'-Biphenyl]-4-yl ethyl(propyl)carbamate (3al)**

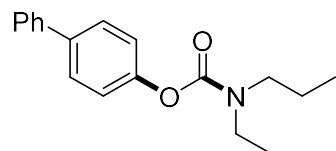

Yield: 15.0 mg (53%); Pale yellow oil;  $^1\text{H}$  NMR (400 MHz,  $\text{CDCl}_3$ ):

$\delta = 7.65 - 7.56$  (m, 4 H),  $7.49 - 7.43$  (m, 2 H),  $7.40 - 7.33$  (m, 1 H),  
 $7.22$  (d,  $J = 8.4$  Hz, 2 H),  $3.58 - 3.24$  (m, 4 H),  $1.80 - 1.58$  (m, 2

H),  $1.36 - 1.19$  (m, 3 H),  $1.08 - 0.91$  (m, 3 H);  $^{13}\text{C}$  NMR (100 MHz,  $\text{CDCl}_3$ ):  $\delta = 154.4$ ,  $151.1$ ,  
 $140.7$ ,  $138.2$ ,  $128.8$ ,  $128.0$ ,  $127.2$ ,  $127.1$ ,  $122.0$ ,  $49.2$ ,  $48.8$ ,  $42.7$ ,  $42.4$ ,  $22.2$ ,  $21.4$ ,  $14.2$ ,  $13.3$ ,  $11.3$ ;  
IR (KBr):  $3050$ ,  $2963$ ,  $2873$ ,  $1719$ ,  $1620$ ,  $1473$ ,  $1215$ ,  $1156$ ,  $952$ ,  $852$ ,  $758$ ,  $696$ ,  $506$   $\text{cm}^{-1}$ ; HRMS-  
ESI ( $m/z$ ): calcd for  $\text{C}_{18}\text{H}_{22}\text{NO}_2$  [ $\text{M} + \text{H}$ ] $^+$ : 284.1645, found: 284.1642.

**[1,1'-Biphenyl]-4-yl benzyl(butyl)carbamate (3am)**

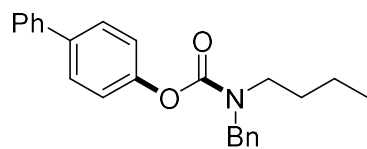

Yield: 22.6 mg (63%); Pale yellow oil;  $^1\text{H}$  NMR (400 MHz,

$\text{CDCl}_3$ ):  $\delta = 7.67 - 7.57$  (m, 4 H),  $7.48$  (t,  $J = 7.6$  Hz, 2 H),  $7.45$   
 $- 7.31$  (m, 6 H),  $7.31 - 7.16$  (m, 2 H),  $4.67$  (d,  $J = 32.0$  Hz, 2 H),

$3.42$  (t,  $J = 7.2$  Hz, 2 H),  $1.73 - 1.60$  (m, 2 H),  $1.47 - 1.32$  (m, 2 H),  $0.99$  (t,  $J = 7.4$  Hz, 3 H);  $^{13}\text{C}$   
NMR (100 MHz,  $\text{CDCl}_3$ ):  $\delta = 155.4$ ,  $154.7$ ,  $151.1$ ,  $140.6$ ,  $138.4$ ,  $137.6$ ,  $128.8$ ,  $128.7$ ,  $128.1$ ,  $127.6$ ,  
 $127.2$ ,  $127.2$ ,  $122.0$ ,  $50.8$ ,  $47.3$ ,  $46.5$ ,  $30.4$ ,  $29.8$ ,  $20.0$ ,  $13.9$ ; IR (KBr):  $3043$ ,  $2947$ ,  $2870$ ,  $1719$ ,  $1603$ ,  
 $1464$ ,  $1418$ ,  $1297$ ,  $1208$ ,  $1127$ ,  $1053$ ,  $945$ ,  $862$ ,  $753$ ,  $702$ ,  $509$   $\text{cm}^{-1}$ ; HRMS-ESI ( $m/z$ ): calcd for  
 $\text{C}_{24}\text{H}_{26}\text{NO}_2$  [ $\text{M} + \text{H}$ ] $^+$ : 360.1958, found: 360.1954.

**[1,1'-Biphenyl]-4-yl benzyl(isopropyl)carbamate (3an)**

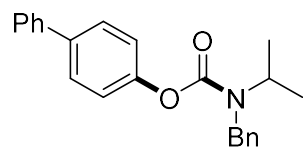

Yield: 20.4 mg (59%); Pale yellow oil;  $^1\text{H}$  NMR (400 MHz,  $\text{CDCl}_3$ ):  $\delta$

$= 7.62 - 7.49$  (m, 4 H),  $7.41$  (t,  $J = 7.6$  Hz, 2 H),  $7.37 - 7.23$  (m, 7 H),  
 $7.14 - 7.05$  (m, 1 H),  $4.58$  (s, 2 H),  $4.47 - 4.20$  (m, 1 H),  $1.23$  (d,  $J =$

$6.4$  Hz, 6 H);  $^{13}\text{C}$  NMR (100 MHz,  $\text{CDCl}_3$ ):  $\delta = 154.4$ ,  $150.9$ ,  $140.7$ ,  $139.2$ ,  $138.4$ ,  $128.8$ ,  $128.5$ ,  
 $128.0$ ,  $127.6$ ,  $127.2$ ,  $127.2$ ,  $127.1$ ,  $126.7$ ,  $49.2$ ,  $47.9$ ,  $46.9$ ,  $21.4$ ,  $20.6$ . IR (KBr):  $3048$ ,  $2969$ ,  $1715$ ,  
 $1608$ ,  $1466$ ,  $1333$ ,  $1196$ ,  $1044$ ,  $849$ ,  $741$ ,  $508$   $\text{cm}^{-1}$ ; HRMS-ESI ( $m/z$ ): calcd for  $\text{C}_{23}\text{H}_{24}\text{NO}_2$  [ $\text{M} +$   
 $\text{H}$ ] $^+$ : 346.1802, found: 346.1797.



**Ethyl N-(((1,1'-biphenyl]-4-yloxy)carbonyl)-N-benzylglycinate (3ao)**

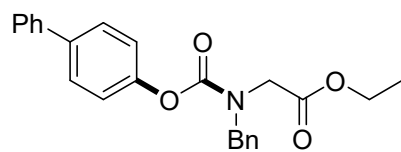

Yield: 20.2 mg (52%); Pale yellow oil;  $^1\text{H NMR}$  (400 MHz,  $\text{CDCl}_3$ ):  $\delta = 7.61$  (t,  $J = 7.3$  Hz, 4 H), 7.50 – 7.33 (m, 8 H), 7.27 – 7.22 (m, 2 H), 4.77 (d,  $J = 43.6$  Hz, 2 H), 4.32 – 4.19

(m, 2 H), 4.10 (s, 2 H), 1.35 – 1.27 (m, 3 H);  $^{13}\text{C NMR}$  (100 MHz,  $\text{CDCl}_3$ ):  $\delta = 169.3, 155.1, 150.8, 140.5, 138.7, 136.4, 128.9, 128.8, 128.5, 128.1, 127.7, 127.3, 127.2, 122.0, 61.41, 52.05, 48.21, 14.23$ ; IR (KBr): 2888, 2787, 1729, 1423, 1308, 1198, 1097, 1020, 837, 741  $\text{cm}^{-1}$ ; HRMS-ESI ( $m/z$ ): calcd for  $\text{C}_{24}\text{H}_{24}\text{NO}_4$  [ $\text{M} + \text{H}$ ] $^+$ : 390.1700, found: 390.1693.

**[1,1'-Biphenyl]-4-ylmethyl(3-phenyl-3-(4-(trifluoromethyl)phenoxy)propyl)carb-amate (3ap).**

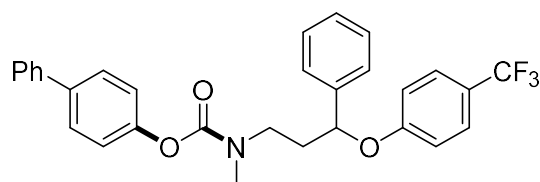

Yield: 22.2 mg (44%); Pale yellow oil;  $^1\text{H NMR}$  (400 MHz,  $\text{CDCl}_3$ ):  $\delta = 7.63 - 7.56$  (m, 3 H), 7.55 – 7.29 (m, 11 H), 7.12 (d,  $J = 8.0$  Hz, 1 H), 6.96 (t,  $J = 8.4$  Hz, 3 H), 5.41 – 5.23 (m, 1 H), 3.99 –

3.40 (m, 2 H), 3.12 (d,  $J = 28.4$  Hz, 3 H), 2.45 – 2.15 (m, 2 H);  $^{13}\text{C NMR}$  (100 MHz,  $\text{CDCl}_3$ ):  $\delta = 160.4, 154.8, 150.8, 140.7, 140.6, 138.4, 129.0$  (d,  $J = 12$  Hz), 128.8, 128.2, 128.1, 128.0, 127.3, 126.89 (q,  $J = 3$  Hz), 125.7 (d,  $J = 15$  Hz), 121.8 (d,  $J = 17$  Hz), 115.81, 115.77, 78.37, 77.74, 46.77, 46.14, 37.32, 36.47, 35.06, 34.98;  $^{19}\text{F NMR}$  (376 MHz,  $\text{CDCl}_3$ ):  $\delta = 61.47$ ; IR (KBr): 3052, 2930, 1717, 1615, 1473, 1400, 1321, 1201, 1118, 834, 759, 698, 630  $\text{cm}^{-1}$ ; HRMS-ESI ( $m/z$ ): calcd for  $\text{C}_{30}\text{H}_{27}\text{F}_3\text{NO}_3$  [ $\text{M} + \text{H}$ ] $^+$ : 506.1938, found: 506.1931.

***p*-Tolyl diethylcarbamate (3ba)<sup>3</sup>**

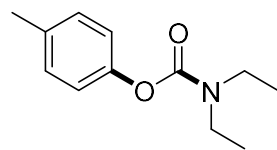

Yield: 12.4 mg (60%); Pale yellow oil;  $^1\text{H NMR}$  (400 MHz,  $\text{CDCl}_3$ ):  $\delta = 7.20 - 7.13$  (m, 2 H), 7.06 – 6.99 (m, 2 H), 3.52 – 3.33 (m, 4 H), 2.35 (s, 3 H), 1.34 – 1.13 (m, 6 H);  $^{13}\text{C NMR}$  (100 MHz,  $\text{CDCl}_3$ ):  $\delta = 154.5,$

149.3, 134.7, 129.7, 121.5, 42.2, 41.8, 20.8, 14.3, 13.4. IR (KBr): 2971, 1720, 1612, 1425, 1275, 1210, 1162, 1091, 1043, 1019, 964, 778, 502  $\text{cm}^{-1}$ . HRMS-ESI ( $m/z$ ): calcd for  $\text{C}_{12}\text{H}_{18}\text{NO}_2$  [ $\text{M} + \text{H}$ ] $^+$ : 208.1332, found: 208.1330.

**Phenyl diethylcarbamate (3ca)<sup>3</sup>**

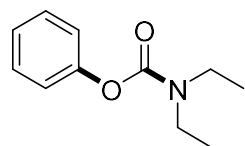

Yield: 6.9 mg (36%); Pale yellow oil;  $^1\text{H NMR}$  (400 MHz,  $\text{CDCl}_3$ ):  $\delta = 7.41 - 7.34$  (m, 2 H), 7.23 – 7.18 (m, 1 H), 7.17 – 7.11 (m, 2 H), 3.53 – 3.32 (m, 4 H), 1.36 – 1.13 (m, 6 H);  $^{13}\text{C NMR}$  (100 MHz,  $\text{CDCl}_3$ ):  $\delta = 154.3, 151.6,$

129.2, 125.1, 121.8, 42.3, 41.9, 14.3, 13.4; IR (KBr): 2974, 1719, 1472, 1421, 1274, 1207, 1157, 1087, 955, 750, 689, 506  $\text{cm}^{-1}$ ; HRMS-ESI ( $m/z$ ): calcd for  $\text{C}_{11}\text{H}_{16}\text{NO}_2$  [ $\text{M} + \text{H}$ ] $^+$ : 194.1176, found: 194.1174.

#### 4-Methoxyphenyl diethylcarbamate (3da)<sup>3</sup>

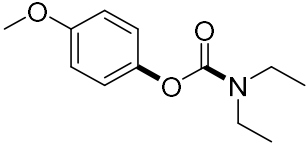 Yield: 11.6 mg (52%); Pale yellow oil;  $^1\text{H}$  NMR (400 MHz,  $\text{CDCl}_3$ ):  $\delta = 7.09 - 7.01$  (m, 2 H),  $6.93 - 6.86$  (m, 2 H),  $3.81$  (s, 3 H),  $3.51 - 3.32$  (m, 4 H),  $1.37 - 1.12$  (m, 6 H);  $^{13}\text{C}$  NMR (100 MHz,  $\text{CDCl}_3$ ):  $\delta = 156.8, 154.7, 145.1, 122.6, 114.3, 55.6, 42.2, 41.8, 14.2, 13.4$ ; IR (KBr): 2976, 1718, 1614, 1501, 1426, 1270, 1202, 1093, 1034, 954, 848, 759, 518  $\text{cm}^{-1}$ ; HRMS-ESI ( $m/z$ ): calcd for  $\text{C}_{12}\text{H}_{18}\text{NO}_2$  [ $\text{M} + \text{H}$ ] $^+$ : 224.1281, found: 224.1278.

#### 4-Phenoxyphenyl diethylcarbamate (3ea)

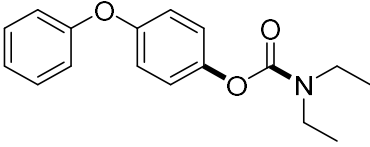 Yield: 11.1 mg (39%); Pale yellow oil;  $^1\text{H}$  NMR (400 MHz,  $\text{CDCl}_3$ ):  $\delta = 7.38 - 7.31$  (m, 2 H),  $7.15 - 7.08$  (m, 3 H),  $7.06 - 7.00$  (m, 4 H),  $3.60 - 3.25$  (m, 4 H),  $1.41 - 1.07$  (m, 6 H);  $^{13}\text{C}$  NMR (100 MHz,  $\text{CDCl}_3$ ):  $\delta = 157.6, 154.4, 154.0, 147.2, 129.7, 123.1, 123.0, 119.8, 118.5, 42.3, 41.9, 14.3, 13.4$ ; IR (KBr): 3058; 2978, 2880; 1720, 1591, 1488, 1419, 1269, 1200, 1156, 1090, 1026, 957, 866, 760, 683, 506  $\text{cm}^{-1}$ ; HRMS-ESI ( $m/z$ ): calcd for  $\text{C}_{17}\text{H}_{20}\text{NO}_2$  [ $\text{M} + \text{H}$ ] $^+$ : 286.1438, found: 286.1434.

#### 4-(4-Bromophenoxy)phenyl diethylcarbamate (3fa)

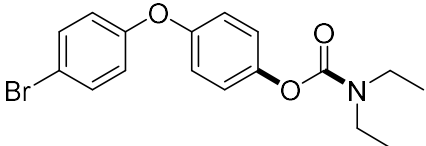 Yield: 22.1 mg (61%); Pale yellow oil;  $^1\text{H}$  NMR (400 MHz,  $\text{CDCl}_3$ ):  $\delta = 7.47 - 7.39$  (m, 2 H),  $7.16 - 7.08$  (m, 2 H),  $7.04 - 6.98$  (m, 2 H),  $6.92 - 6.86$  (m, 2 H),  $3.54 - 3.31$  (m, 4 H),  $1.37 - 1.11$  (m, 6 H);  $^{13}\text{C}$  NMR (100 MHz,  $\text{CDCl}_3$ ):  $\delta = 156.9, 154.3, 153.5, 147.5, 132.7, 123.1, 120.1, 119.9, 115.5, 42.3, 41.9, 14.3, 13.4$ ; IR (KBr): 2975, 2827, 1719, 1603, 1482, 1416, 1365, 1265, 1200, 1080, 953, 828, 764, 506  $\text{cm}^{-1}$ ; HRMS-ESI ( $m/z$ ): calcd for  $\text{C}_{17}\text{H}_{19}\text{BrNO}_3$  [ $\text{M} + \text{H}$ ] $^+$ : 364.0543, found: 364.0538.

#### 4-Fluorophenyl diethylcarbamate (3ga)<sup>3</sup>

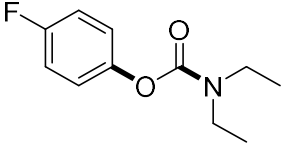 Yield: 8.0 mg (38%); Pale yellow oil;  $^1\text{H}$  NMR (400 MHz,  $\text{CDCl}_3$ ):  $\delta = 7.20 - 6.96$  (m, 4 H),  $3.53 - 3.33$  (m, 4 H),  $1.34 - 1.13$  (m, 6 H);  $^{13}\text{C}$  NMR (100 MHz,  $\text{CDCl}_3$ ):  $\delta = 159.9$  ( $J = 242$ ),  $154.2, 147.4$  ( $J = 2$ ),

123.1 ( $J = 9$ ), 115.8 ( $J = 23$ ), 42.3, 41.9, 14.2, 13.4;  $^{19}\text{F}$  NMR (376 MHz,  $\text{CDCl}_3$ ):  $\delta = -118.31$ ; IR (KBr): 2943, 2833, 1724, 1607, 1421, 1275, 1211, 1157, 1093, 1042, 1014, 952, 854, 760, 694, 502  $\text{cm}^{-1}$ ; HRMS-ESI ( $m/z$ ): calcd for  $\text{C}_{11}\text{H}_{15}\text{FNO}_2$  [ $\text{M} + \text{H}$ ] $^+$ : 212.1081, found: 212.1077.

#### 4-Chlorophenyl diethylcarbamate (3ha)<sup>3</sup>

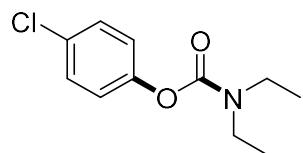

Yield: 12.0 mg (53%); Pale yellow oil;  $^1\text{H}$  NMR (400 MHz,  $\text{CDCl}_3$ ):  $\delta = 7.36 - 7.31$  (m, 2 H),  $7.11 - 7.06$  (m, 2 H),  $3.50 - 3.34$  (m, 4 H),  $1.32 - 1.16$  (m, 6 H);  $^{13}\text{C}$  NMR (100 MHz,  $\text{CDCl}_3$ ):  $\delta = 153.9, 150.1, 130.3, 129.2, 123.2, 42.3, 41.9, 14.3, 13.4$ ; IR (KBr): 2976, 1724, 1624, 1480, 1276, 1215, 1156, 1089, 1025, 954, 854, 771, 683, 509  $\text{cm}^{-1}$ ; HRMS-ESI ( $m/z$ ): calcd for  $\text{C}_{11}\text{H}_{15}\text{ClNO}_2$  [ $\text{M} + \text{H}$ ] $^+$ : 228.0786, found: 228.0783.

#### 4-Iodophenyl diethylcarbamate (3ia)<sup>3</sup>

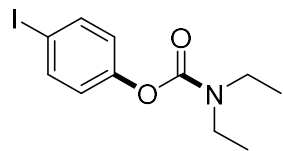

Yield: 13.7 mg (43%); Pale yellow oil;  $^1\text{H}$  NMR (400 MHz,  $\text{CDCl}_3$ ):  $\delta = 7.70 - 7.64$  (m, 2 H),  $6.95 - 6.89$  (m, 2 H),  $3.61 - 3.26$  (m, 4 H),  $1.31 - 1.17$  (m, 6 H);  $^{13}\text{C}$  NMR (100 MHz,  $\text{CDCl}_3$ ):  $\delta = 153.7, 151.5, 138.2, 124.0, 88.8, 42.3, 41.9, 14.2, 13.4$ ; IR (KBr): 3067, 2972, 1719, 1623, 1470, 1421, 1275, 1211, 1157, 1093, 1042, 1014, 952, 854, 760, 694, 502  $\text{cm}^{-1}$ ; HRMS-ESI ( $m/z$ ): calcd for  $\text{C}_{11}\text{H}_{15}\text{INO}_2$  [ $\text{M} + \text{H}$ ] $^+$ : 320.0142, found: 320.0137.

#### Mesityl diethylcarbamate (3ja)<sup>3</sup>

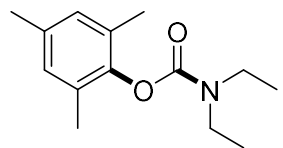

Yield: 7.1 mg (30%); Pale yellow oil;  $^1\text{H}$  NMR (400 MHz,  $\text{CDCl}_3$ ):  $\delta = 6.88$  (s, 2 H),  $3.52$  (q,  $J = 7.2$  Hz, 2 H),  $3.43$  (q,  $J = 7.2$  Hz, 2 H),  $2.29$  (s, 3 H),  $2.18$  (s, 6 H),  $1.32$  (t,  $J = 7.2$  Hz, 3 H),  $1.23$  (t,  $J = 7.2$  Hz, 3 H);  $^{13}\text{C}$  NMR (100 MHz,  $\text{CDCl}_3$ ):  $\delta = 153.6, 146.5, 134.6, 130.3, 129.1, 42.2, 41.9, 20.8, 16.3, 14.4, 13.5$ ; IR (KBr): 2965, 1715, 1419, 1279, 1161, 1085, 955, 859, 765  $\text{cm}^{-1}$ .

#### 3,4-Dimethylphenyl diethylcarbamate (3ka)

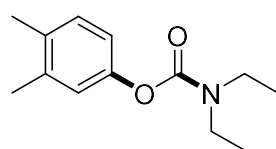

Yield: 12.2 mg (55%); Pale yellow oil;  $^1\text{H}$  NMR (400 MHz,  $\text{CDCl}_3$ ):  $\delta = 7.12$  (d,  $J = 8.4$  Hz, 1 H),  $6.93$  (d,  $J = 2.4$  Hz, 1 H),  $6.87$  (dd,  $J = 8.0, 2.4$  Hz, 1 H),  $3.43$  (s, 4 H),  $2.27$  (s, 3 H),  $2.25$  (s, 3 H),  $1.31 - 1.17$  (m, 6 H);  $^{13}\text{C}$  NMR (101 MHz,  $\text{CDCl}_3$ ):  $\delta = 154.6, 149.5, 137.5, 133.2, 130.1, 122.8, 118.8, 42.2, 41.9, 19.8, 19.1, 14.2, 13.4$ ; IR (KBr): 2967, 2347, 1719, 1627, 1416, 1259, 1161, 1074, 988, 880, 773  $\text{cm}^{-1}$ ; HRMS-ESI ( $m/z$ ): calcd for  $\text{C}_{13}\text{H}_{20}\text{NO}_2$  [ $\text{M} + \text{H}$ ] $^+$ : 222.1489, found: 222.1485.

### 3-Fluoro-4-methoxyphenyl diethylcarbamate (3la)

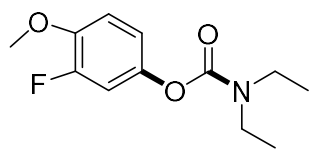

Yield: 10.8 mg (45%); Pale yellow oil;  $^1\text{H NMR}$  (400 MHz,  $\text{CDCl}_3$ ):  $\delta = 6.97 - 6.90$  (m, 2 H),  $6.89 - 6.83$  (m, 1 H),  $3.89$  (s, 3 H),  $3.50 - 3.30$  (m, 4 H),  $1.32 - 1.15$  (m, 6 H);  $^{13}\text{C NMR}$  (100 MHz,  $\text{CDCl}_3$ ):  $\delta = 154.1, 152.0$  (d,  $J = 246$  Hz),  $145.1$  (d,  $J = 11$  Hz),  $144.8$  (d,  $J = 10$  Hz),  $117.2$  (d,  $J = 4$  Hz),  $113.4$  (d,  $J = 3$  Hz),  $110.9$  (d,  $J = 20$  Hz),  $56.7, 42.3, 41.9, 14.2, 13.4$ ; IR (KBr):  $2976, 2352, 1720, 1602, 1514, 1423, 1262, 1158, 1033, 974, 889, 765, 591$   $\text{cm}^{-1}$ ; HRMS-ESI ( $m/z$ ): calcd for  $\text{C}_{12}\text{H}_{17}\text{FNO}_3$   $[\text{M} + \text{H}]^+$ : 242.1187, found: 242.1182.

### 9H-fluoren-3-yl diethylcarbamate (3ma)

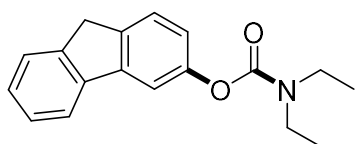

Yield: 16.3 mg (58%); Yellow solid; m.p.  $97-99^\circ\text{C}$ ;  $^1\text{H NMR}$  (400 MHz,  $\text{CDCl}_3$ ):  $\delta = 7.78$  (d,  $J = 8.4$  Hz, 2 H),  $7.56$  (d,  $J = 7.6$  Hz, 1 H),  $7.44 - 7.35$  (m, 2 H),  $7.35 - 7.27$  (m, 1 H),  $7.17$  (dd,  $J = 8.4, 2.0$  Hz, 1 H),  $3.93$  (s, 2 H),  $3.58 - 3.40$  (m, 4 H),  $1.36 - 1.20$  (m, 6 H);  $^{13}\text{C NMR}$  (100 MHz,  $\text{CDCl}_3$ ):  $\delta = 154.6, 150.7, 144.4, 143.3, 141.2, 138.8, 126.8, 126.4, 125.0, 120.4, 120.2, 119.7, 118.8, 42.3, 42.0, 37.0, 14.3, 13.5$ ; IR (KBr):  $3063, 2974, 2350, 1717, 1417, 1250, 1155, 963, 874, 752$   $\text{cm}^{-1}$ ; HRMS-ESI ( $m/z$ ): calcd for  $\text{C}_{18}\text{H}_{20}\text{NO}_2$   $[\text{M} + \text{H}]^+$ : 282.1489, found: 282.1484.

### 2,3-Dihydrobenzofuran-5-yl diethylcarbamate (3na)

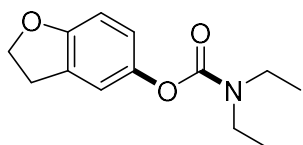

Yield: 11.0 mg (47%); Pale yellow oil;  $^1\text{H NMR}$  (400 MHz,  $\text{CDCl}_3$ ):  $\delta = 6.98$  (t,  $J = 1.2$  Hz, 1 H),  $6.83$  (dd,  $J = 8.6, 2.6$  Hz, 1 H),  $6.74$  (d,  $J = 8.4$  Hz, 1 H),  $4.59$  (t,  $J = 8.6$  Hz, 2 H),  $3.50 - 3.32$  (m, 4 H),  $3.22$  (t,  $J = 8.6$  Hz, 2 H),  $1.31 - 1.14$  (m, 6 H);  $^{13}\text{C NMR}$  (100 MHz,  $\text{CDCl}_3$ ):  $\delta = 157.3, 154.9, 145.1, 127.8, 121.0, 118.8, 109.1, 71.6, 42.2, 41.8, 30.0, 14.2, 13.4$ ; IR (KBr):  $3711, 2975, 2896, 2348, 1715, 1478, 1424, 1263, 1168, 1085, 966, 793, 676$   $\text{cm}^{-1}$ ; HRMS-ESI ( $m/z$ ): calcd for  $\text{C}_{13}\text{H}_{18}\text{NO}_3$   $[\text{M} + \text{H}]^+$ : 236.1281, found: 236.1277.

### 9-Oxo-9H-xanthen-2-yl diethylcarbamate (3oa)

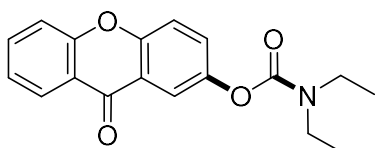

Yield: 13.1 mg (42%); Yellow solid; m.p.  $105-106^\circ\text{C}$ ;  $^1\text{H NMR}$  (400 MHz,  $\text{CDCl}_3$ ):  $\delta = 8.36$  (dd,  $J = 8.0, 1.6$  Hz, 1 H),  $8.05$  (d,  $J = 2.8$  Hz, 1 H),  $7.79 - 7.72$  (m, 1 H),  $7.59$  (dd,  $J = 8.8, 2.8$  Hz, 1 H),  $7.55 - 7.49$  (m, 2 H),  $7.44 - 7.38$  (m, 1 H),  $3.64 - 3.23$  (m, 4 H),  $1.43 - 1.11$  (m, 6 H);  $^{13}\text{C NMR}$  (100 MHz,  $\text{CDCl}_3$ ):  $\delta = 176.7, 156.2, 154.0, 153.4, 147.6, 134.9, 129.6, 126.8, 124.0, 122.2,$

121.3, 119.0, 118.5, 118.0, 42.4, 42.0, 14.3, 13.4; IR (KBr): 3067, 2972, 2921, 2796, 1719, 1662, 1434, 1317, 1264, 1209, 1152, 1053, 951, 874, 759, 640  $\text{cm}^{-1}$ ; HRMS-ESI ( $m/z$ ): calcd for  $\text{C}_{18}\text{H}_{18}\text{NO}_4$  [ $\text{M} + \text{H}$ ] $^+$ : 312.1230, found: 312.1223.

**Methyl 4-(4'-((diethylcarbamoyloxy)-[1,1'-biphenyl]-4-yl)-4-oxobutanoate (3pa)**

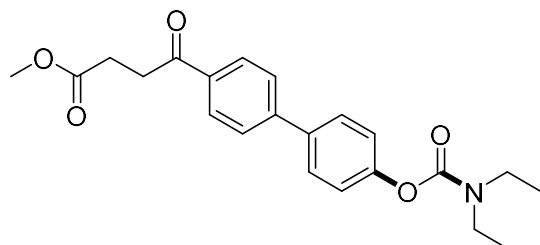

Yield: 18.1 mg (47%); Pale yellow oil;  $^1\text{H}$  NMR (400 MHz,  $\text{CDCl}_3$ ):  $\delta$  = 8.06 (d,  $J$  = 8.4 Hz, 2 H), 7.68 (d,  $J$  = 8.4 Hz, 2 H), 7.62 (d,  $J$  = 8.4 Hz, 2 H), 7.25 (d,  $J$  = 8.4 Hz, 2 H), 3.73 (s, 3 H), 3.53 – 3.40 (m, 4 H), 3.37 (t,  $J$  = 6.4 Hz, 2 H), 2.81 (t,  $J$  = 6.4 Hz, 2 H), 1.34 – 1.12 (m, 6 H);  $^{13}\text{C}$  NMR (100 MHz,  $\text{CDCl}_3$ ):  $\delta$  = 197.6, 173.4, 154.1, 151.8, 145.3, 136.7, 135.2, 128.7, 128.1, 127.2, 122.3, 51.9, 42.3, 42.0, 33.4, 28.1, 14.3, 13.4; IR (KBr): 2888, 2789, 1715, 1618, 1415, 1313, 1212, 1171, 959, 818, 735, 650  $\text{cm}^{-1}$ ; HRMS-ESI ( $m/z$ ): calcd for  $\text{C}_{22}\text{H}_{26}\text{NO}_5$  [ $\text{M} + \text{H}$ ] $^+$ : 384.1805, found: 384.1797.

**Methyl 5-(4'-((diethylcarbamoyloxy)-2,5-dimethylphenoxy)-2,2-dimethylpentanoate (3qa).**

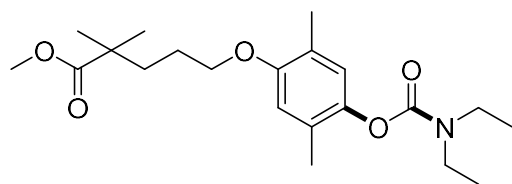

Yield: 10.6 mg (28%); Pale yellow oil;  $^1\text{H}$  NMR (400 MHz,  $\text{CDCl}_3$ ):  $\delta$  = 6.84 (s, 1 H), 6.62 (s, 1 H), 3.91 (s, 2 H), 3.69 (s, 3 H), 3.51 – 3.33 (m, 4 H), 2.18 (d,  $J$  = 2.8 Hz, 6 H), 1.73 (d,  $J$  = 2.8 Hz, 4 H), 1.36 – 1.12 (m, 12 H);  $^{13}\text{C}$  NMR (100 MHz,  $\text{CDCl}_3$ ):  $\delta$  = 178.3, 154.5, 154.3, 142.9, 127.9, 125.1, 124.1, 113.4, 68.5, 51.7, 42.2, 42.1, 41.8, 37.1, 25.2, 16.3, 15.8, 14.3, 13.5; IR (KBr): 3633, 3308, 2938, 1720, 1613, 1408, 1275, 1178, 1053, 962, 876, 761, 666  $\text{cm}^{-1}$ ; HRMS-ESI ( $m/z$ ): calcd for  $\text{C}_{21}\text{H}_{34}\text{NO}_5$  [ $\text{M} + \text{H}$ ] $^+$ : 380.2431, found: 380.2424.

**[1,1'-Biphenyl]-4-ol (4aa)<sup>4</sup>**

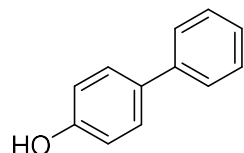

Yield: 27.9 mg (82%);  $^1\text{H}$  NMR (400 MHz,  $\text{DMSO}-d_6$ ):  $\delta$  = 9.58 (s, 1 H), 7.57 (d,  $J$  = 7.2 Hz, 2 H), 7.48 (d,  $J$  = 8.4 Hz, 2 H), 7.40 (t,  $J$  = 7.6 Hz, 2 H), 7.27 (t,  $J$  = 7.2 Hz, 1 H), 6.85 (d,  $J$  = 8.4 Hz, 2 H);  $^{13}\text{C}$  NMR (100 MHz,  $\text{DMSO}-d_6$ ):  $\delta$  = 157.6, 140.7, 131.4, 129.3, 128.2, 126.8, 126.4, 116.2.

**3-Benzoyl-[1,1'-biphenyl]-4-yl diethylcarbamate (4ab)**

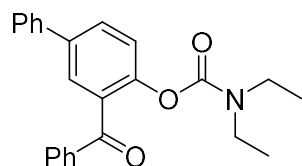

Yield: 34.7 mg (62%); Colorless oil;  $^1\text{H NMR}$  (400 MHz,  $\text{CDCl}_3$ ):  $\delta =$

7.92 – 7.85 (m, 2 H), 7.79 – 7.71 (m, 2 H), 7.63 – 7.55 (m, 3 H), 7.50

– 7.43 (m, 4 H), 7.40 – 7.35 (m, 2 H), 3.22 (q,  $J = 7.2$  Hz, 2 H), 3.05

(q,  $J = 7.0$  Hz, 2 H), 1.04 (t,  $J = 7.2$  Hz, 3 H), 0.98 (t,  $J = 7.2$  Hz, 3 H);  $^{13}\text{C NMR}$  (100 MHz,  $\text{CDCl}_3$ ):

$\delta = 195.1, 153.1, 148.7, 139.7, 138.2, 137.6, 133.0, 132.3, 130.4, 129.9, 128.9, 128.5, 128.4, 127.6,$

$127.1, 123.6, 42.2, 41.6, 13.8, 13.2$ ; IR (KBr): 2886, 2782, 1716, 1429, 1303, 948, 835, 708  $\text{cm}^{-1}$ ;

HRMS-ESI ( $m/z$ ): calcd for  $\text{C}_{24}\text{H}_{24}\text{NO}_3$  [ $\text{M} + \text{H}$ ] $^+$ : 374.1751, found: 374.1743.

#### 4-(2,2-Diphenylvinyl)-1,1'-biphenyl (5aa)

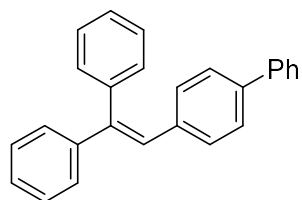

Yield: 20.0 mg (60%); Colorless oil;  $^1\text{H NMR}$  (400 MHz,  $\text{CDCl}_3$ ):  $\delta =$

7.58 (d,  $J = 7.2$  Hz, 2 H), 7.47 – 7.25 (m, 15 H), 7.13 (d,  $J = 8.4$  Hz, 2

H), 7.04 (s, 1 H);  $^{13}\text{C NMR}$  (100 MHz,  $\text{CDCl}_3$ ):  $\delta = 143.4, 142.7, 140.6,$

$140.5, 139.3, 136.5, 130.4, 130.0, 128.8, 128.7, 128.2, 127.7, 127.6,$

$127.6, 127.5, 127.2, 126.9, 126.6$ ; IR (KBr): 3045, 2931, 2855, 1728, 1605, 1479, 1364, 1018, 890,

762, 698, 496  $\text{cm}^{-1}$ ; HRMS-ESI ( $m/z$ ): calcd for  $\text{C}_{26}\text{H}_{21}$  [ $\text{M} + \text{H}$ ] $^+$ : 333.1638, found: 333.1634.

## J. References

- (a). J. Li, J. Chen, R. Sang, W.-S. Ham, M. B. Plutschack, F. Berger, S. Chhabra, A. Schnegg, C. Genicot, T. Ritter, *Nat. Chem.*, 2020, **12**, 5. (b) L. Liang, H.-Y. Niu, R.-L. Li, Y.-F. Wang, J.-K. Yan, C.-G. Li, and H.-M. Guo, *Org. Lett.*, 2020, **22**, 6842. (c) Y. Wu, Y.-H. Huang, X.-Y. Chen, and P. Wang, *Org. Lett.*, 2020, **22**, 6657. (d) B. Zhao, Q. Wang, T. Zhu, B. Feng and M. Ma, *Org. Lett.*, 2022, **24**, 5608.
- M. S. Lowry, J. I. Goldsmith, J. D. Slinker, R. Rohl, R. A. Pascal, Jr., G. G. Malliaras and S. Bernhard, *Chem. Mater.*, 2005, **17**, 5712.
- W. Xiong, C. Qi, T. Guo, H. Jiang, *Green Chem.*, 2017, **19**, 1642.
- S. R. Chowdhury, S. K. Nandi, D. Halder, *ACS Omega*, 2022, **7**, 21566.

## K. NMR Spectra

### [1,1'-Biphenyl]-4-yl diethylcarbamate (3aa)

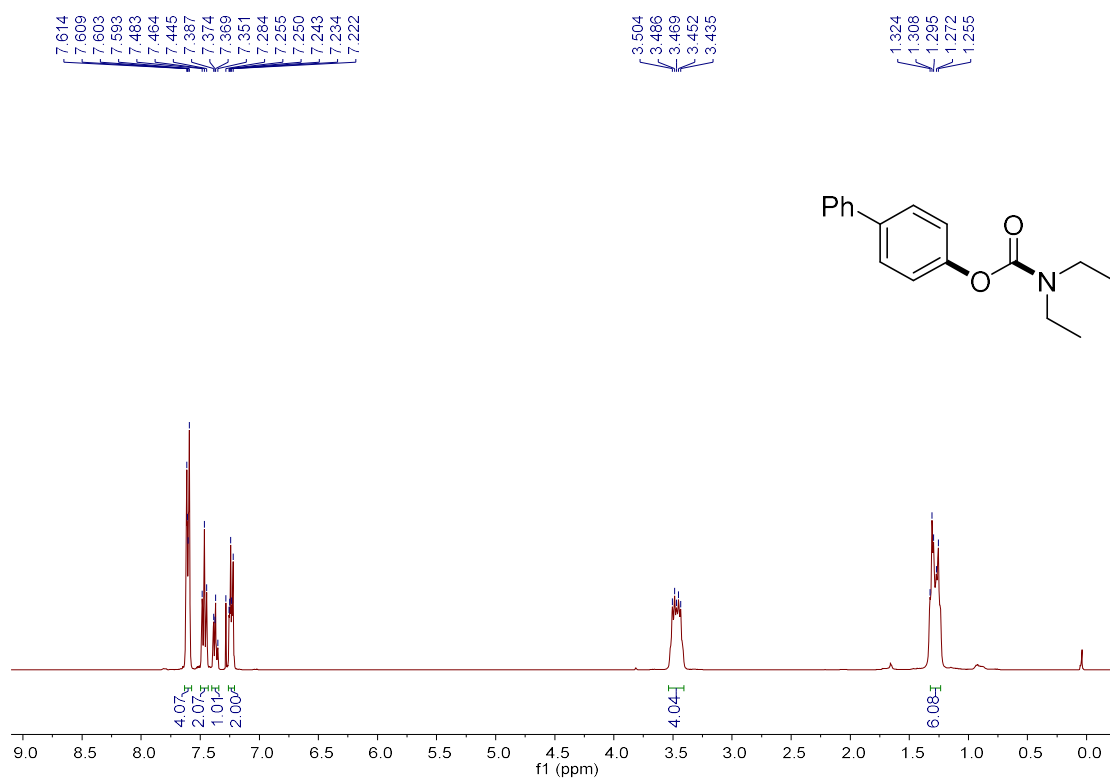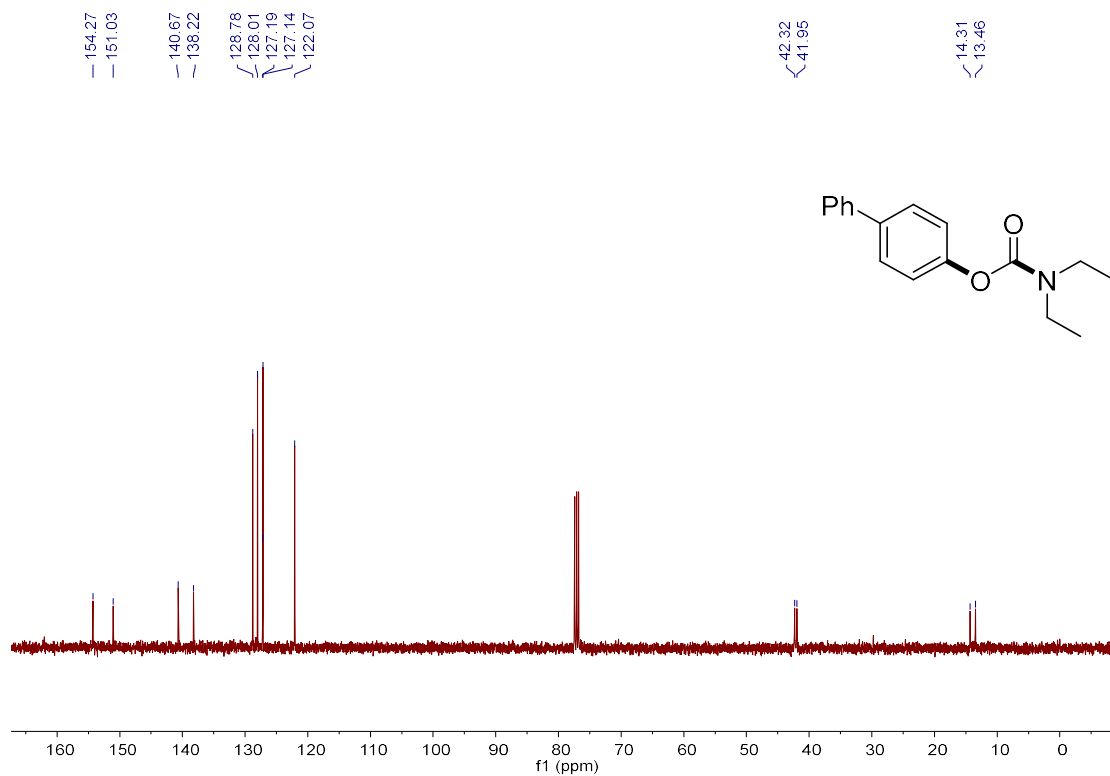

# [1,1'-Biphenyl]-4-yl dimethylcarbamate (3ab)

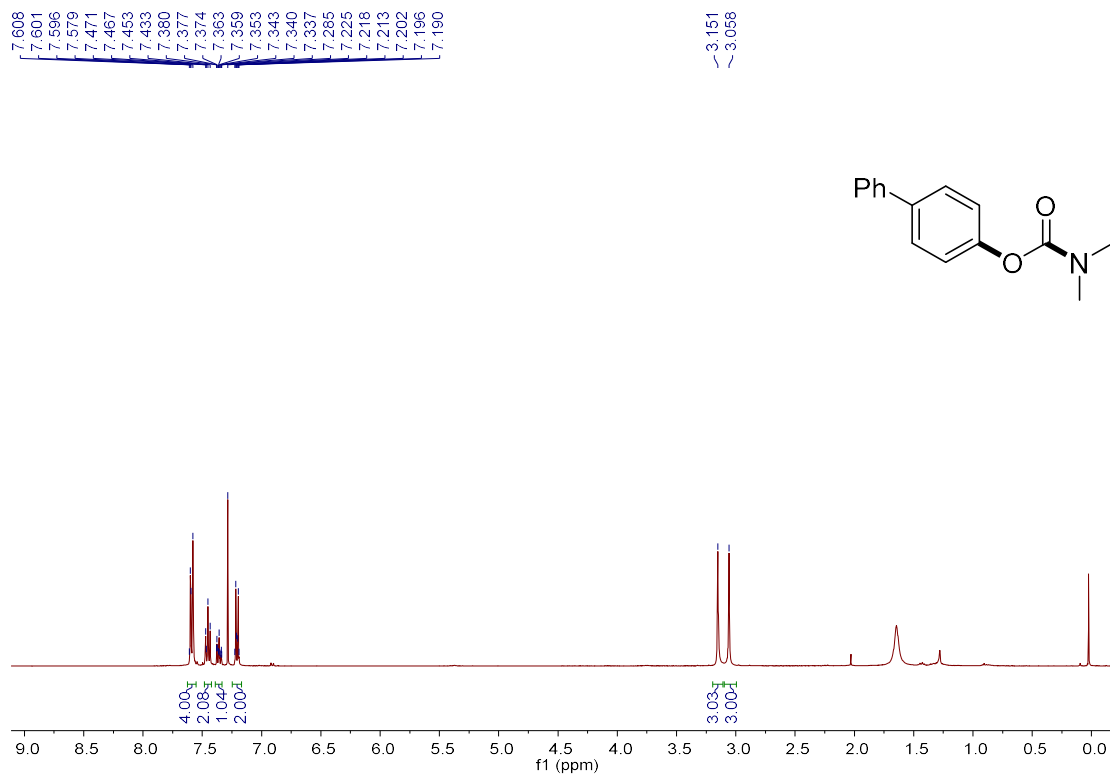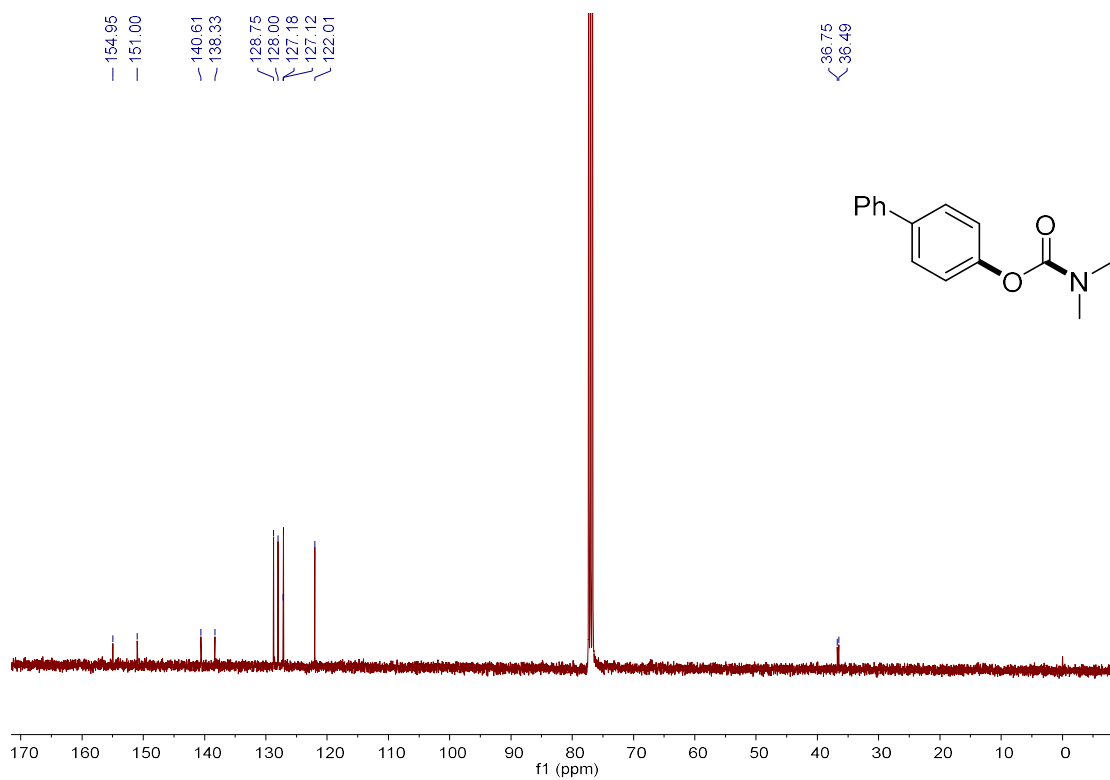



# [1,1'-Biphenyl]-4-yl dipropylcarbamate (3ac)

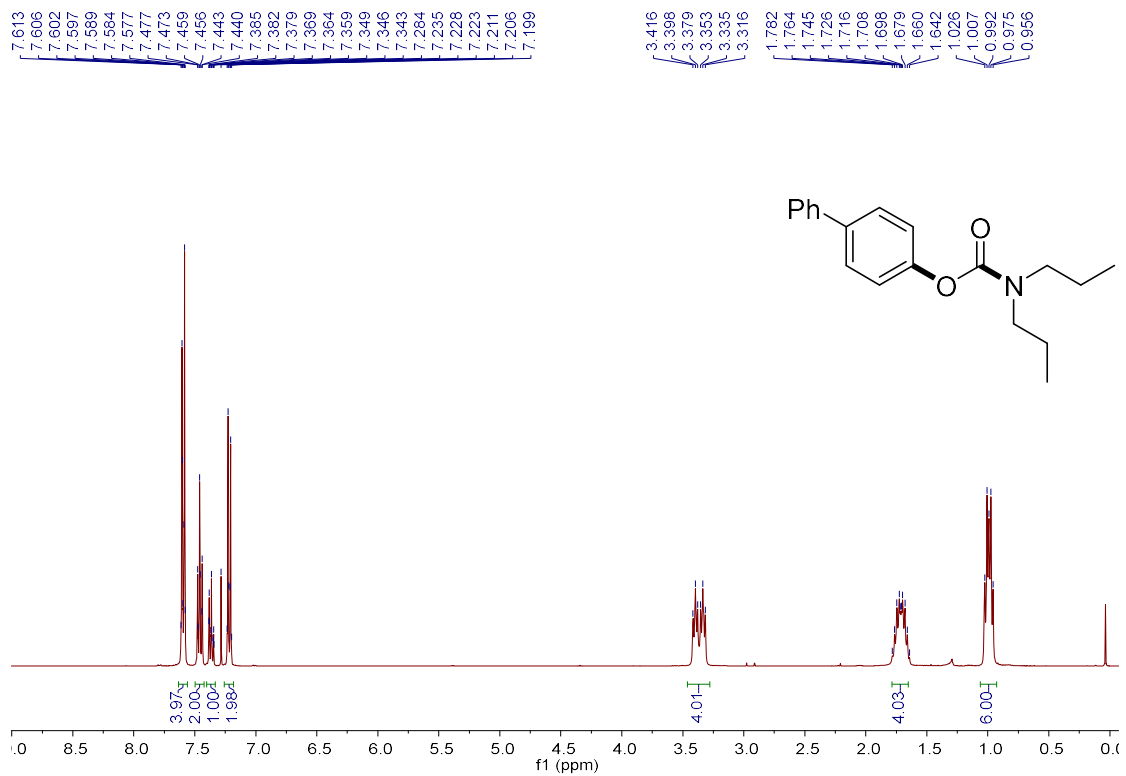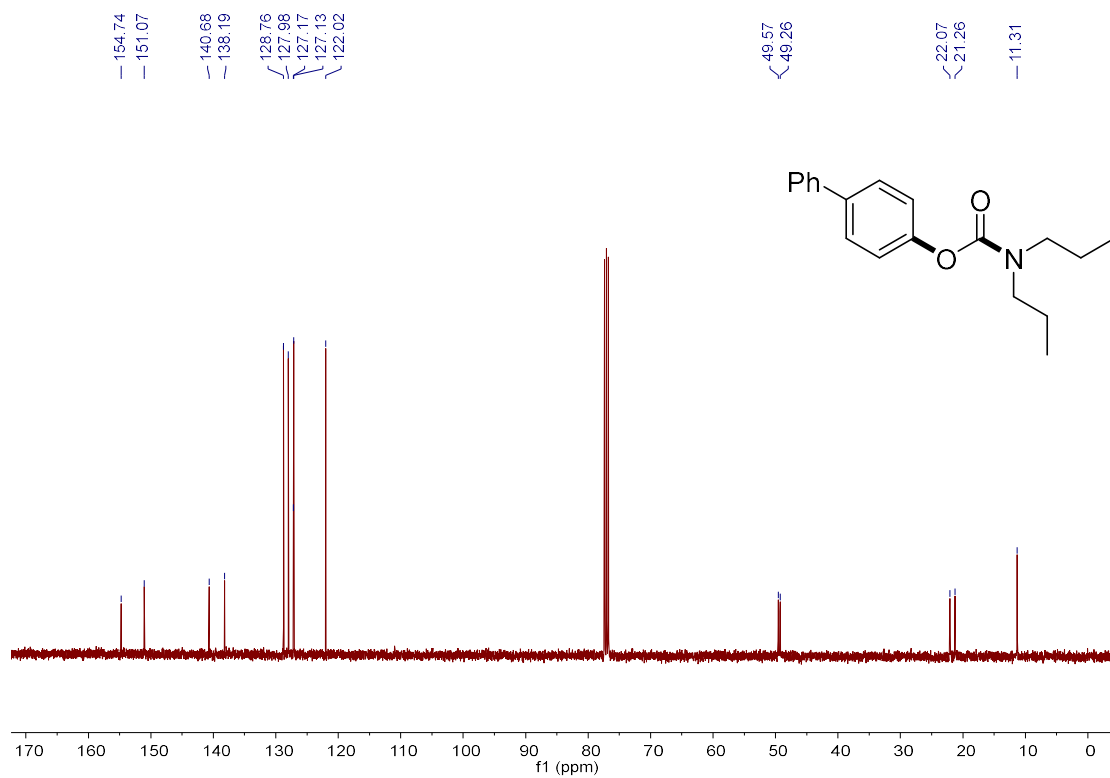

[1,1'-Biphenyl]-4-yl dibutylcarbamate (3ad)

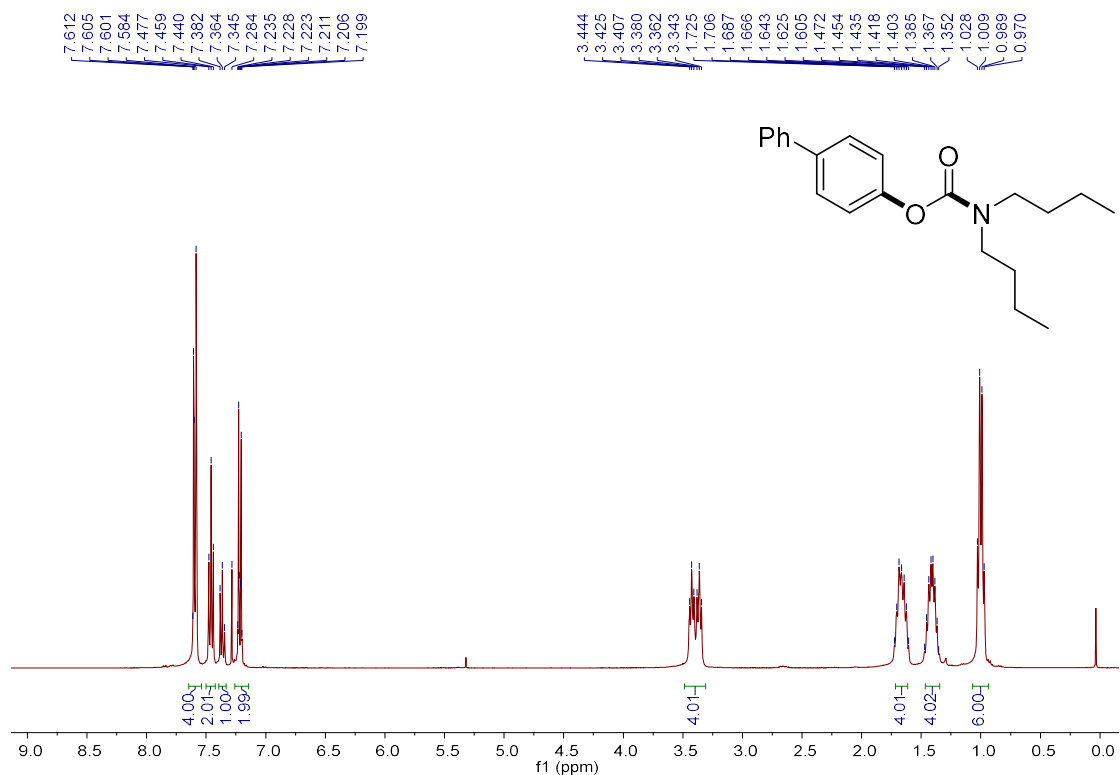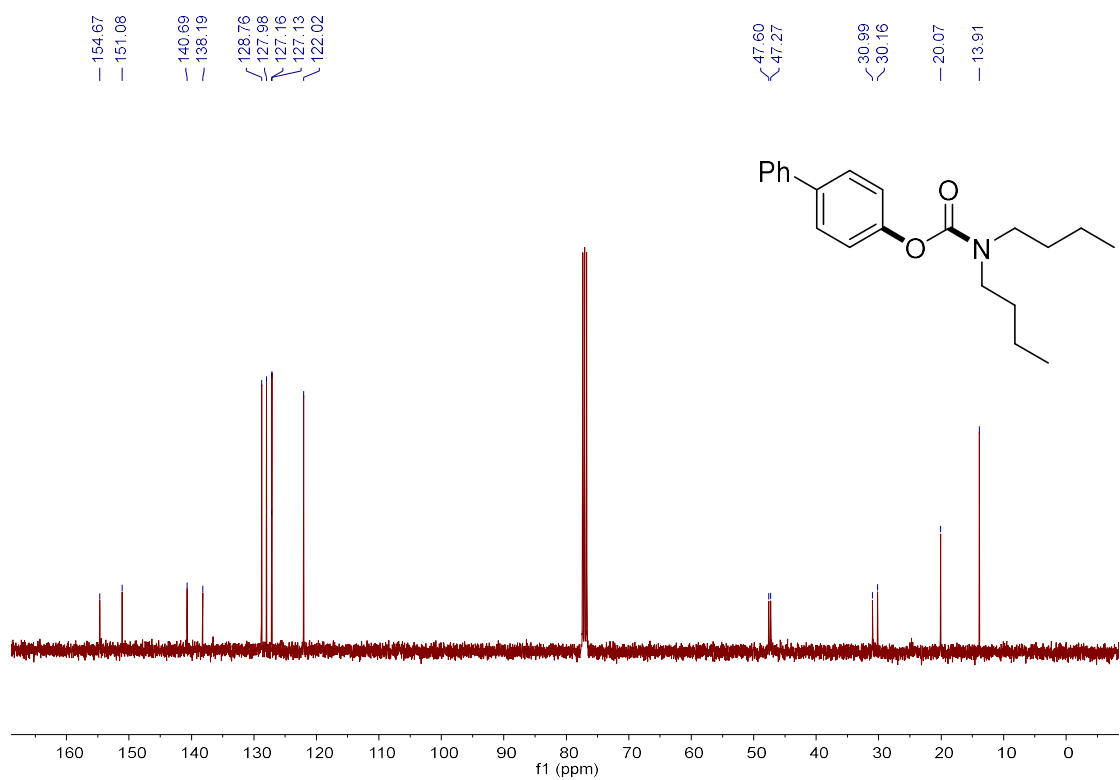

[1,1'-Biphenyl]-4-yl diisopropylcarbamate (3ae)

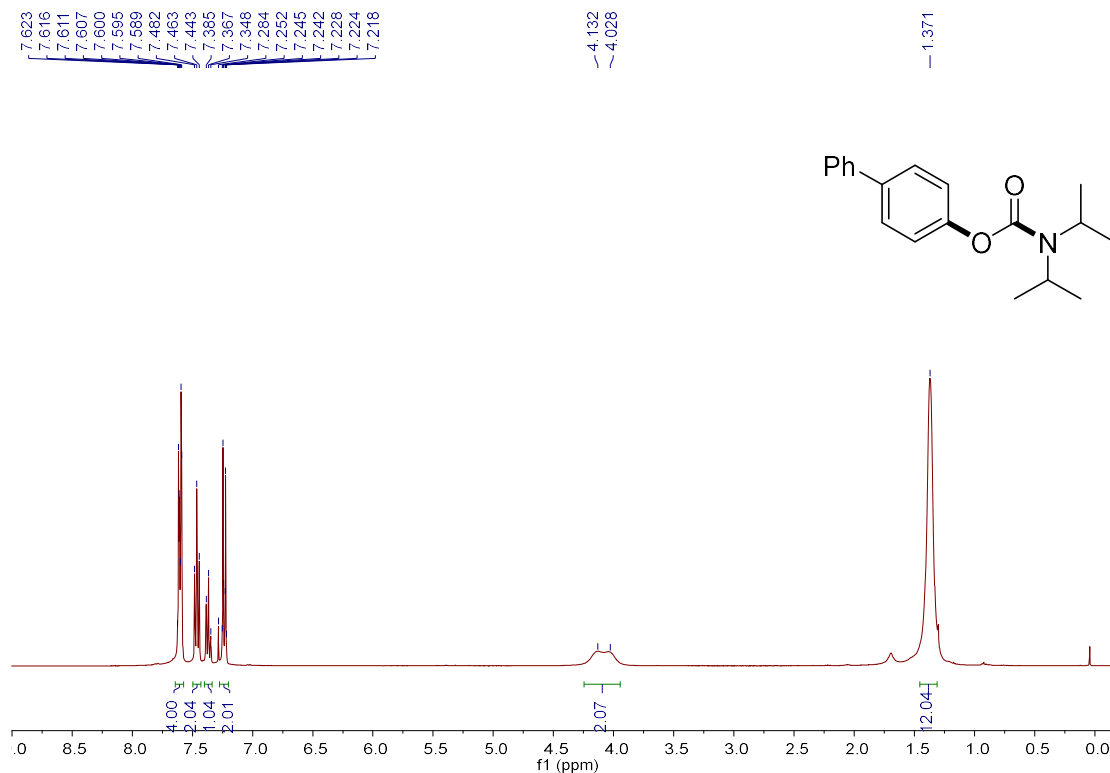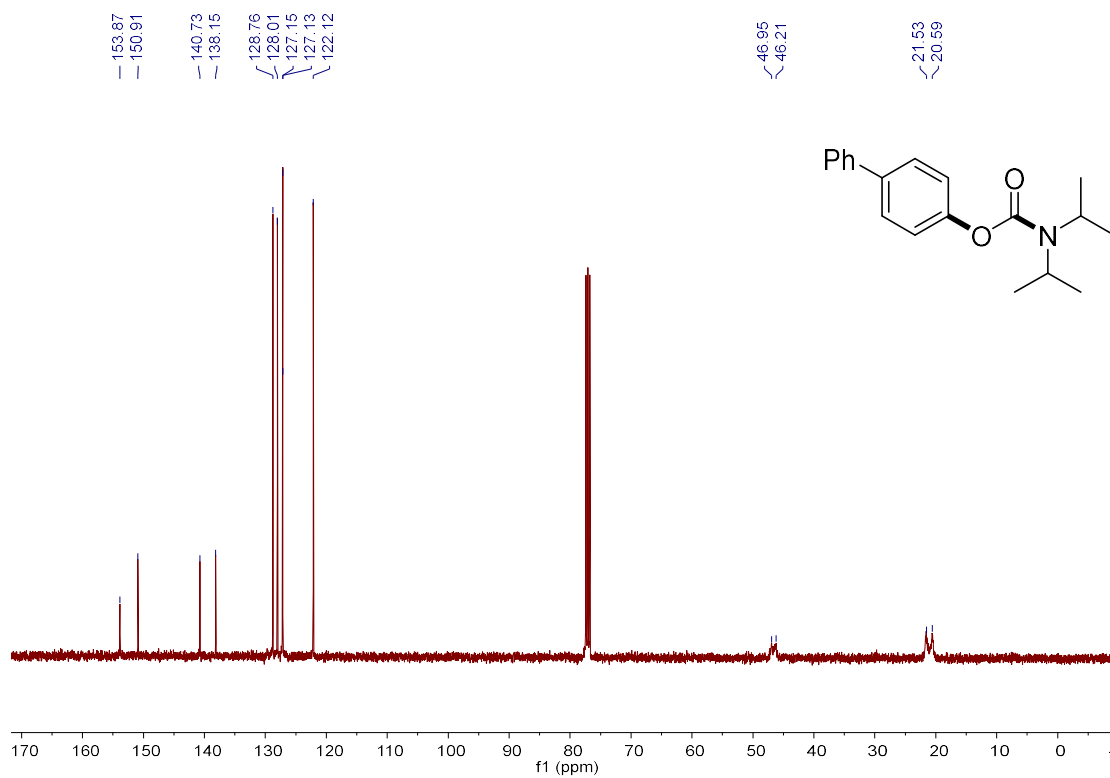

[1,1'-Biphenyl]-4-yl diisobutylcarbamate (3af)

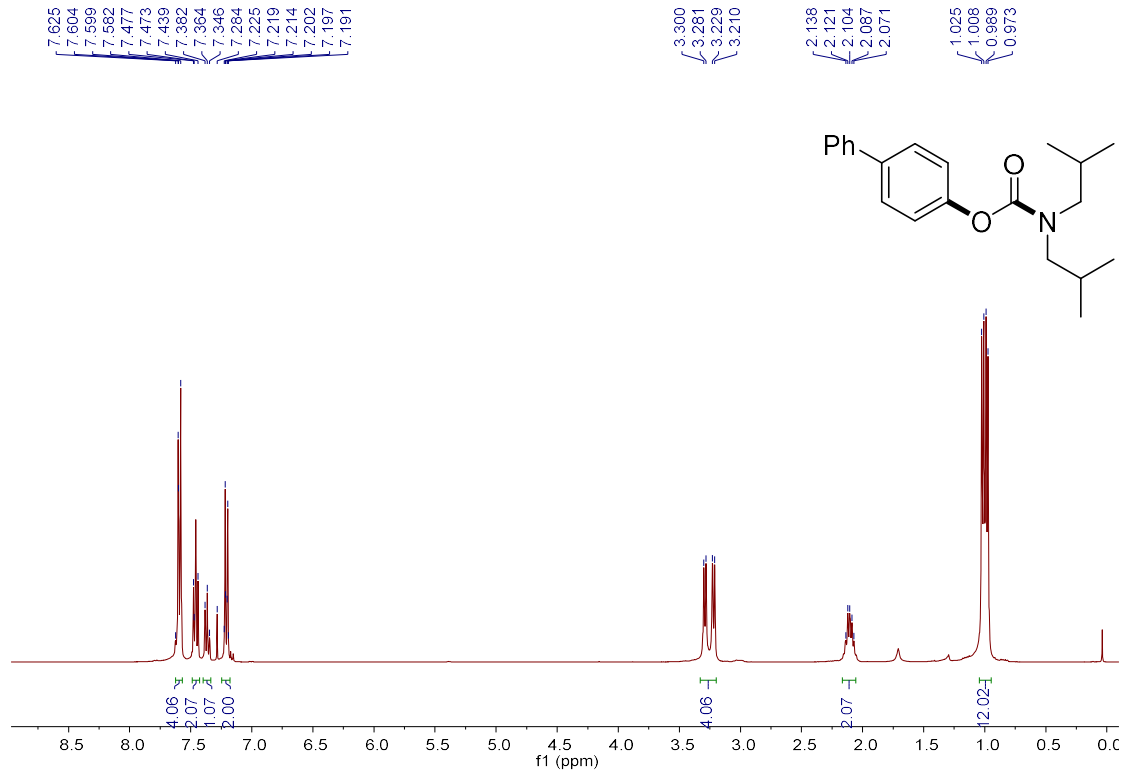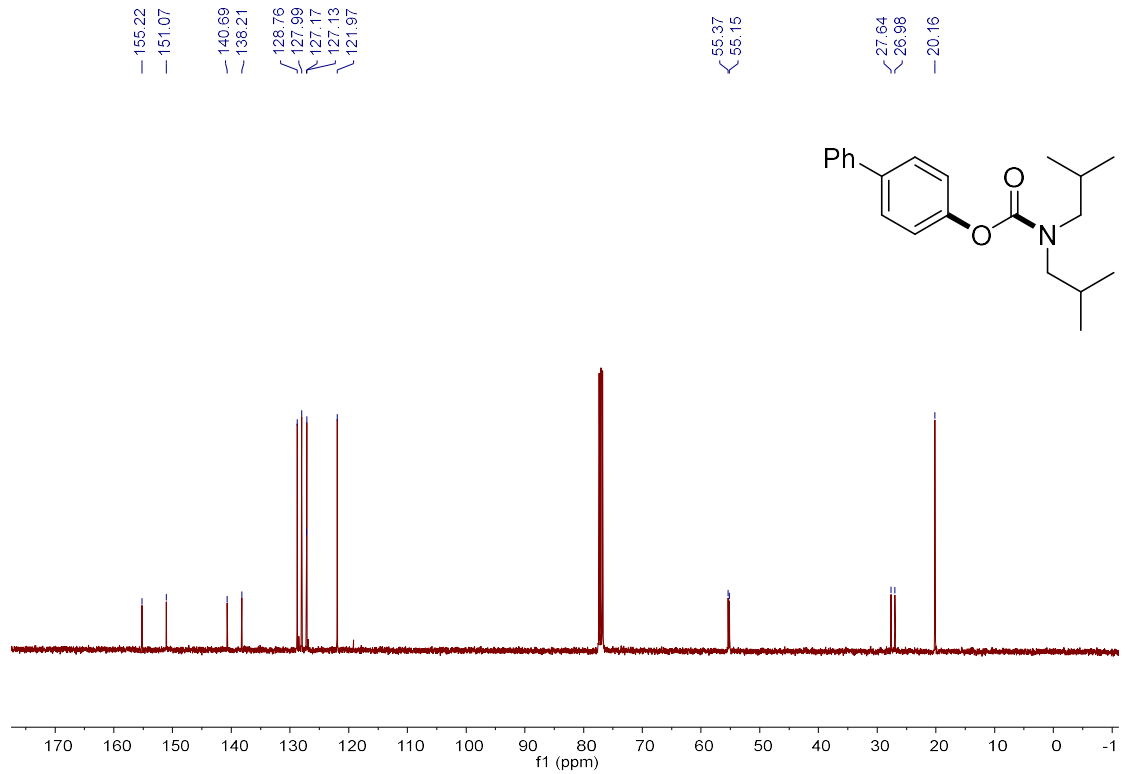

# [1,1'-Biphenyl]-4-yl dicyclohexylcarbamate (3ag)

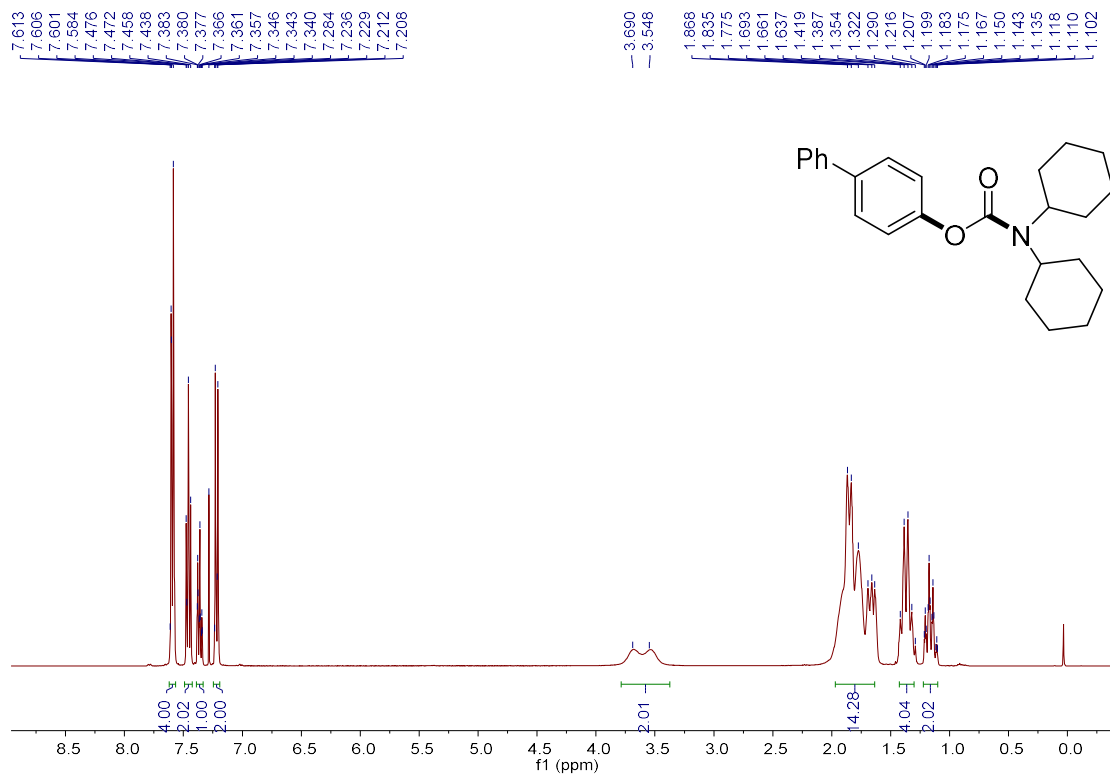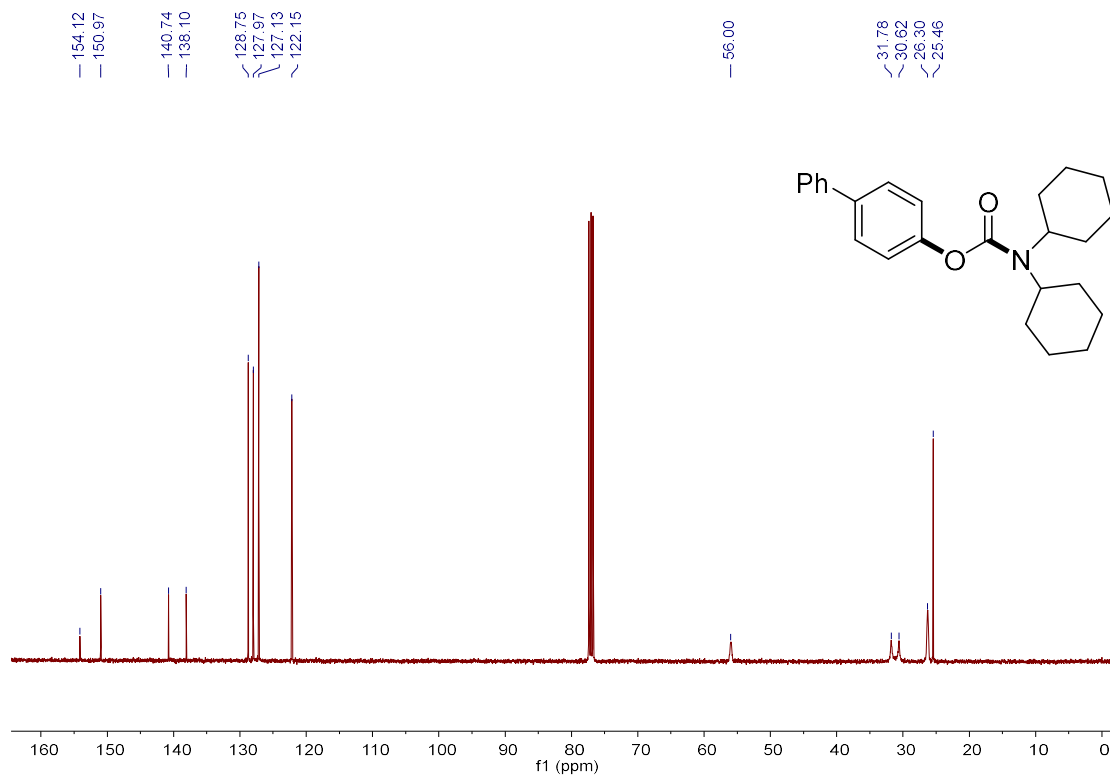

[1,1'-Biphenyl]-4-yl bis(2-ethylhexyl)carbamate (3ah).

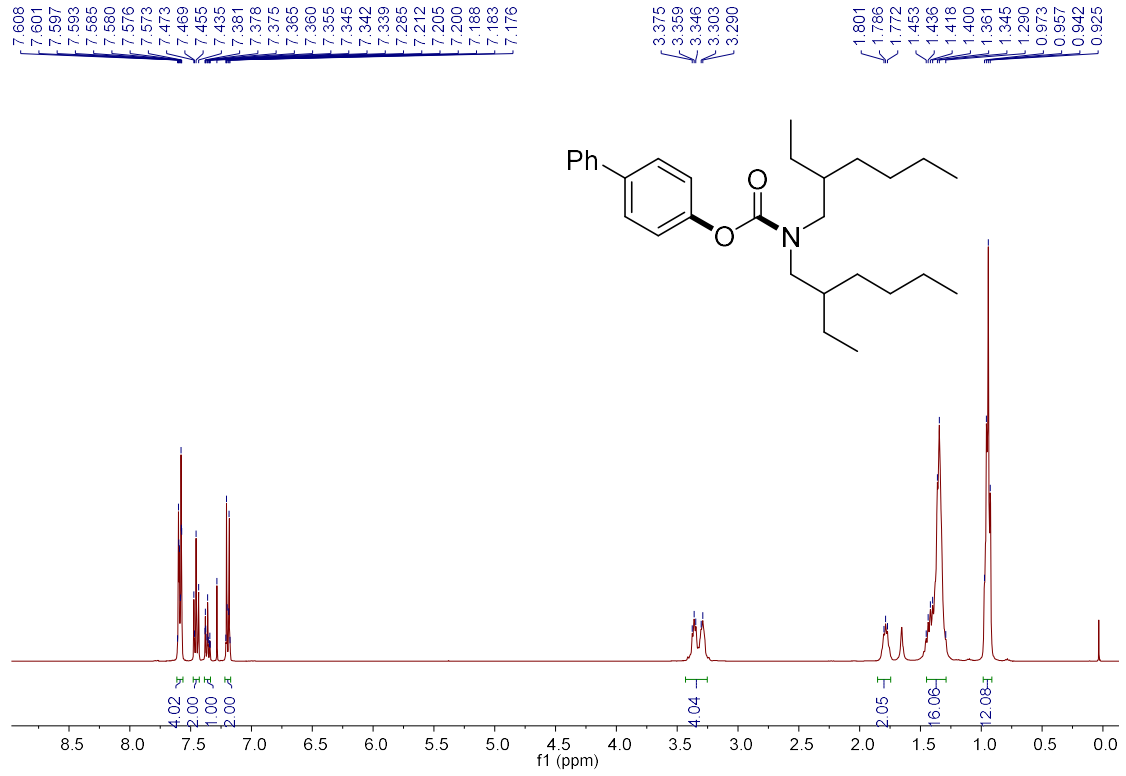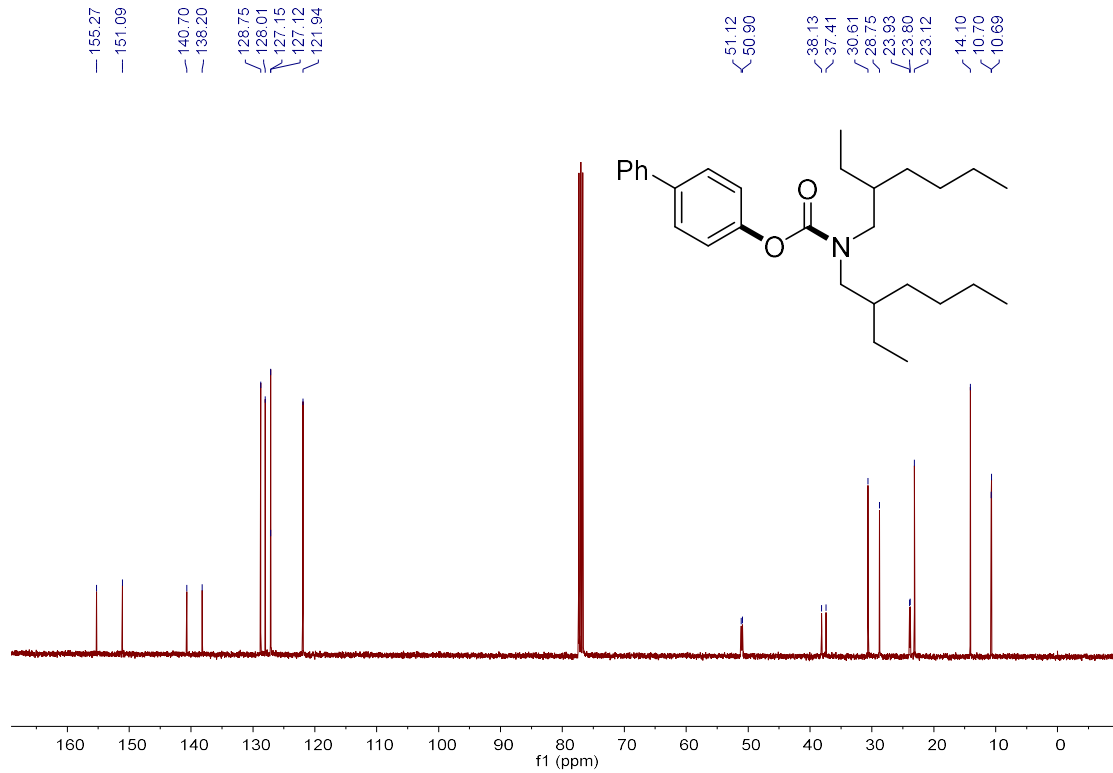

### [1,1'-Biphenyl]-4-yl dibenzylcarbamate (3ai)

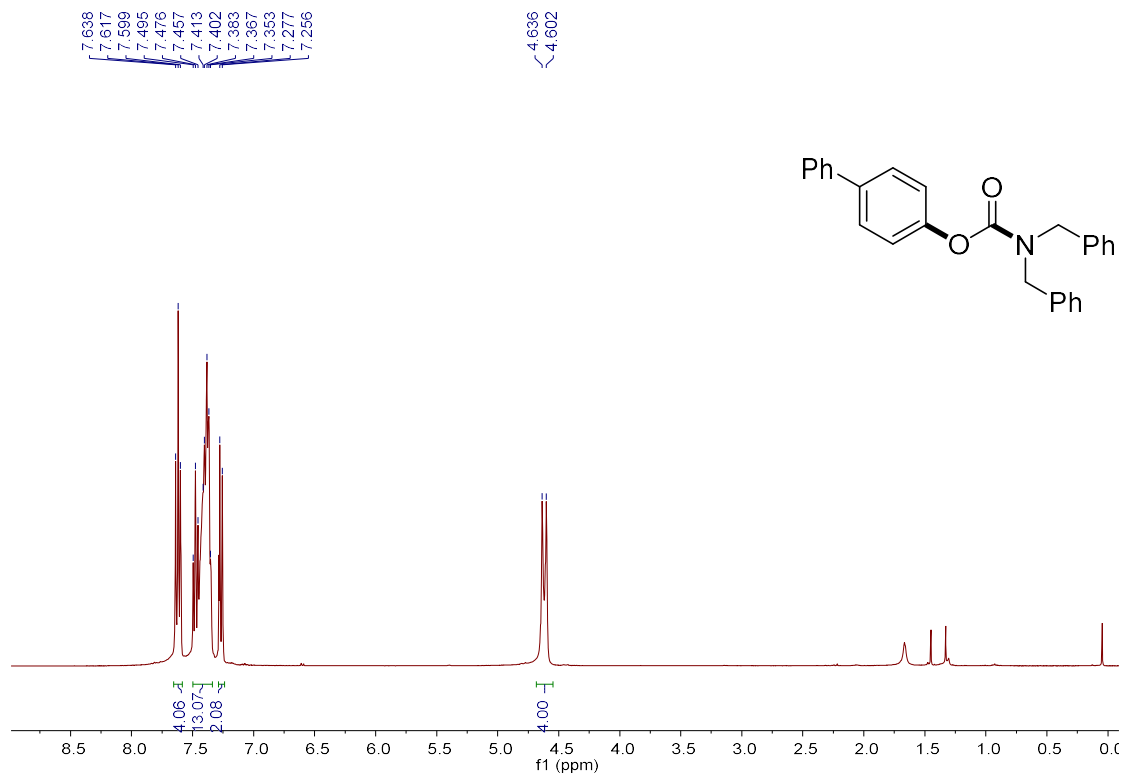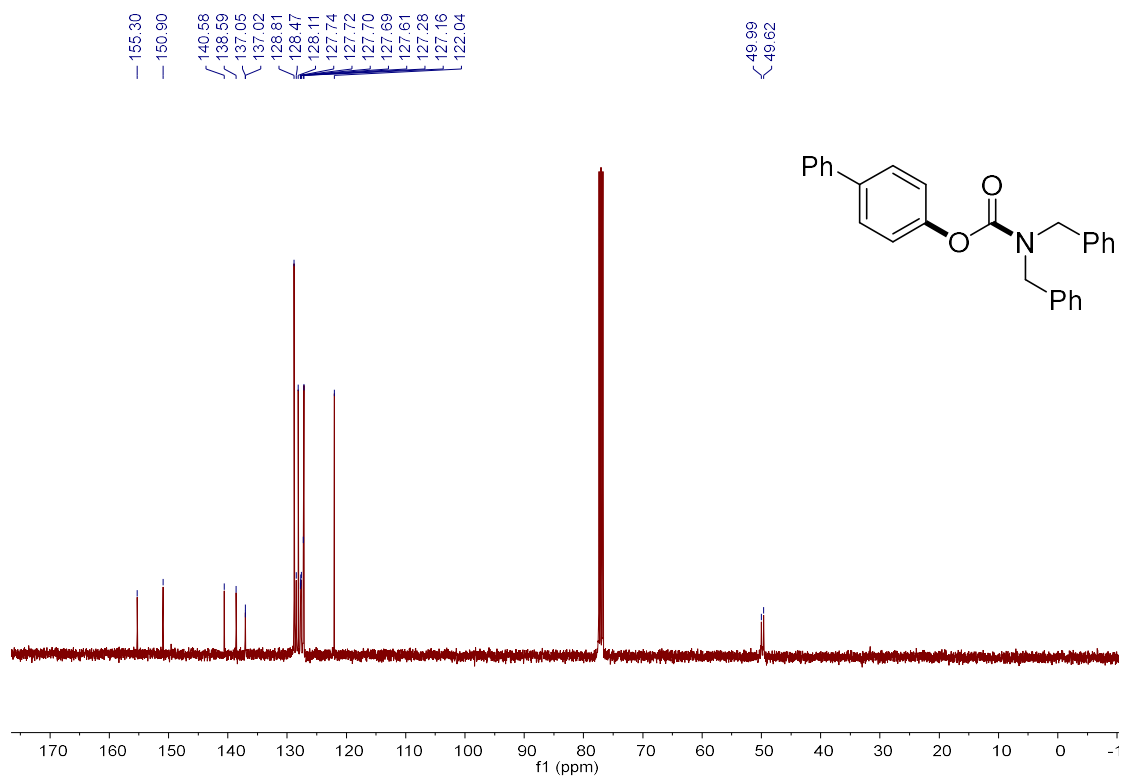

[1,1'-Biphenyl]-4-yl pyrrolidine-1-carboxylate (3aj)

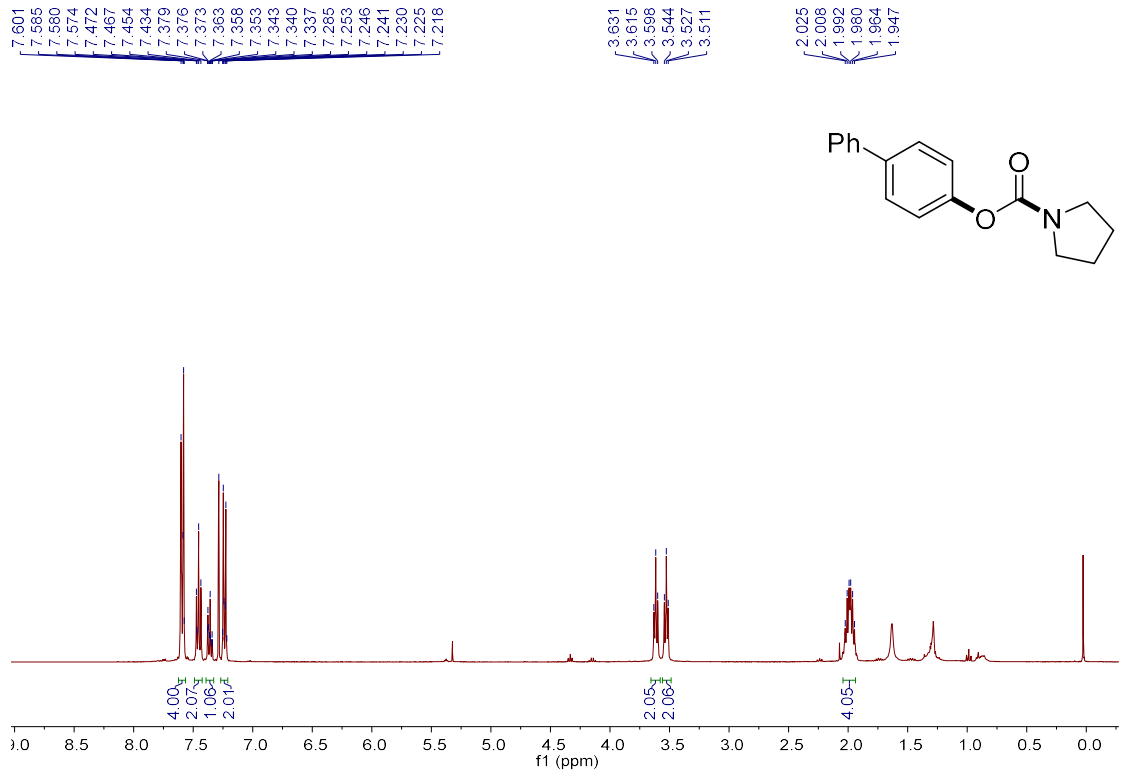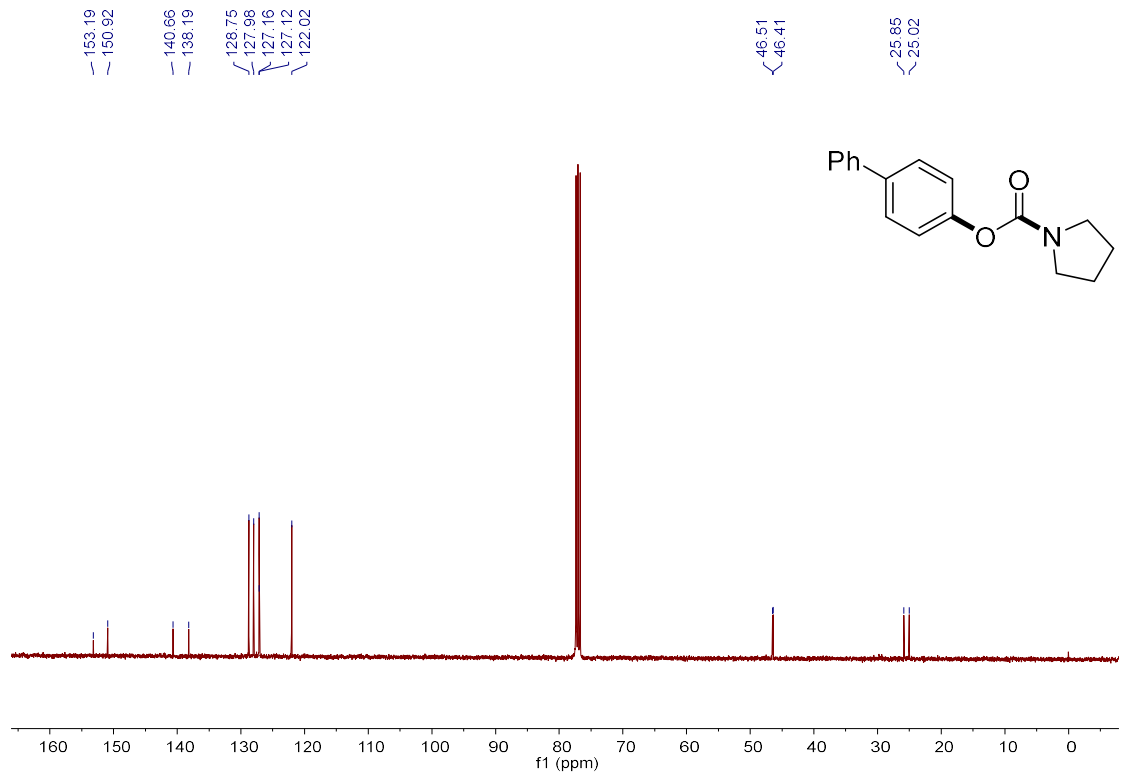



[1,1'-Biphenyl]-4-yl azepane-1-carboxylate (3ak)

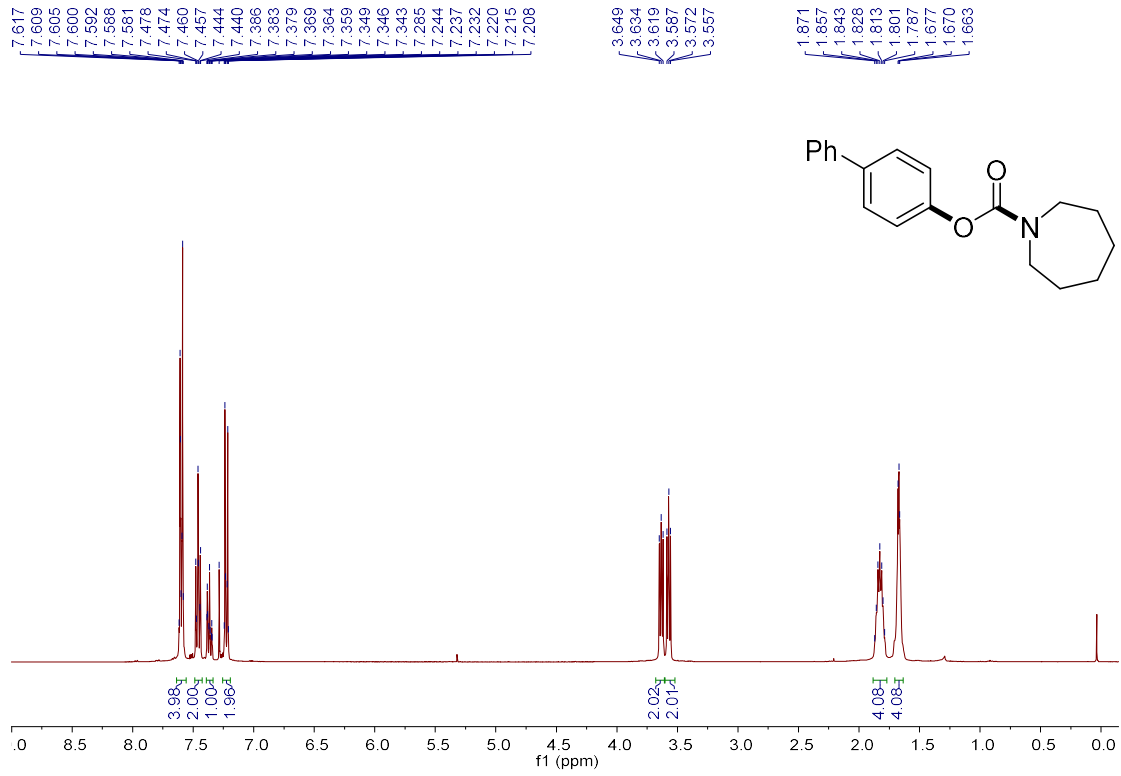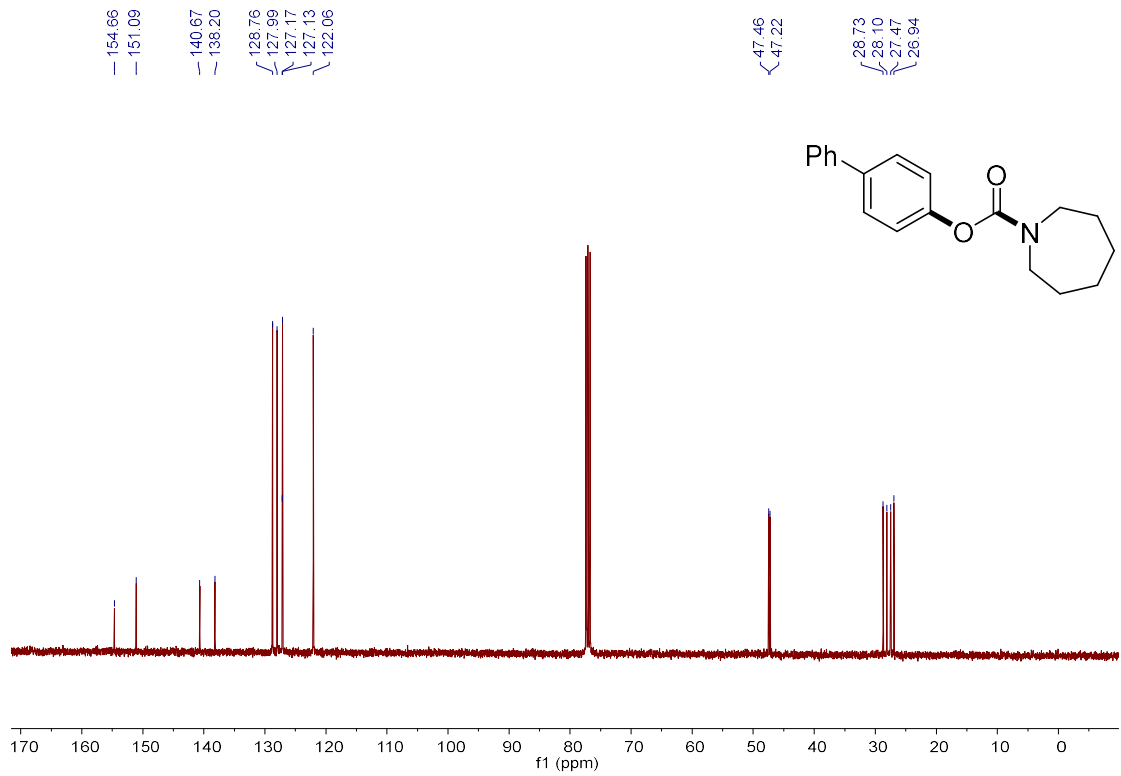

[1,1'-Biphenyl]-4-yl ethyl(propyl)carbamate (3a)

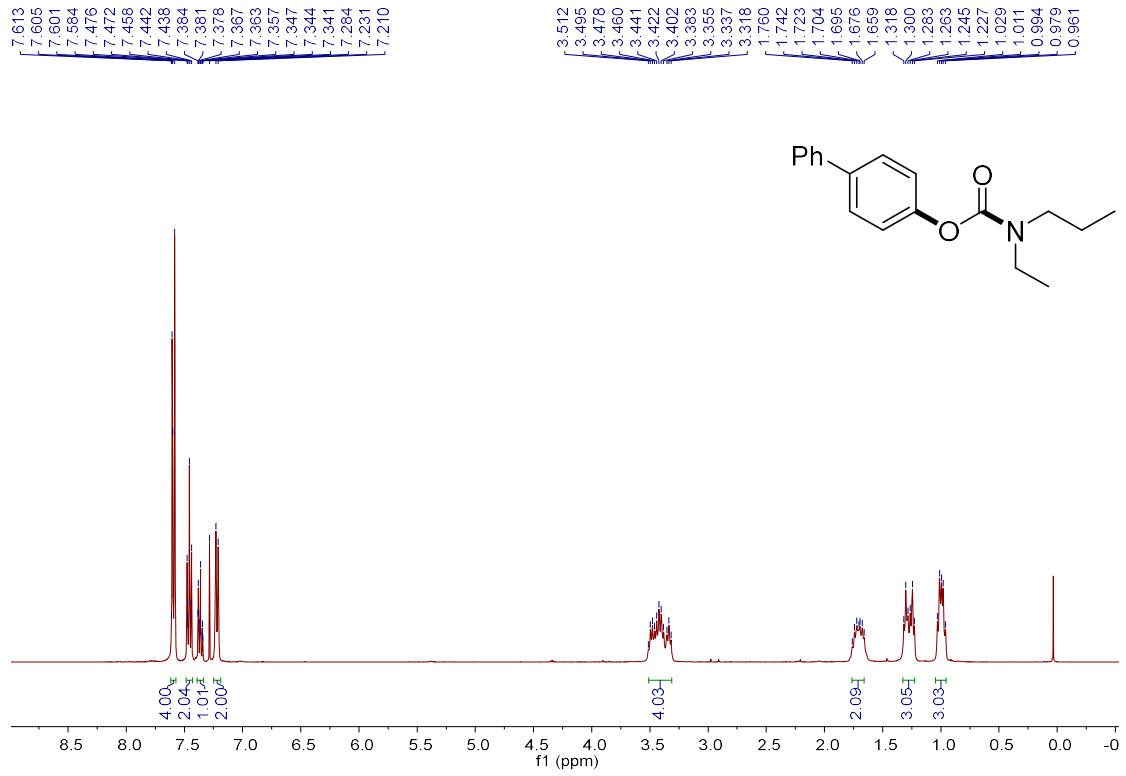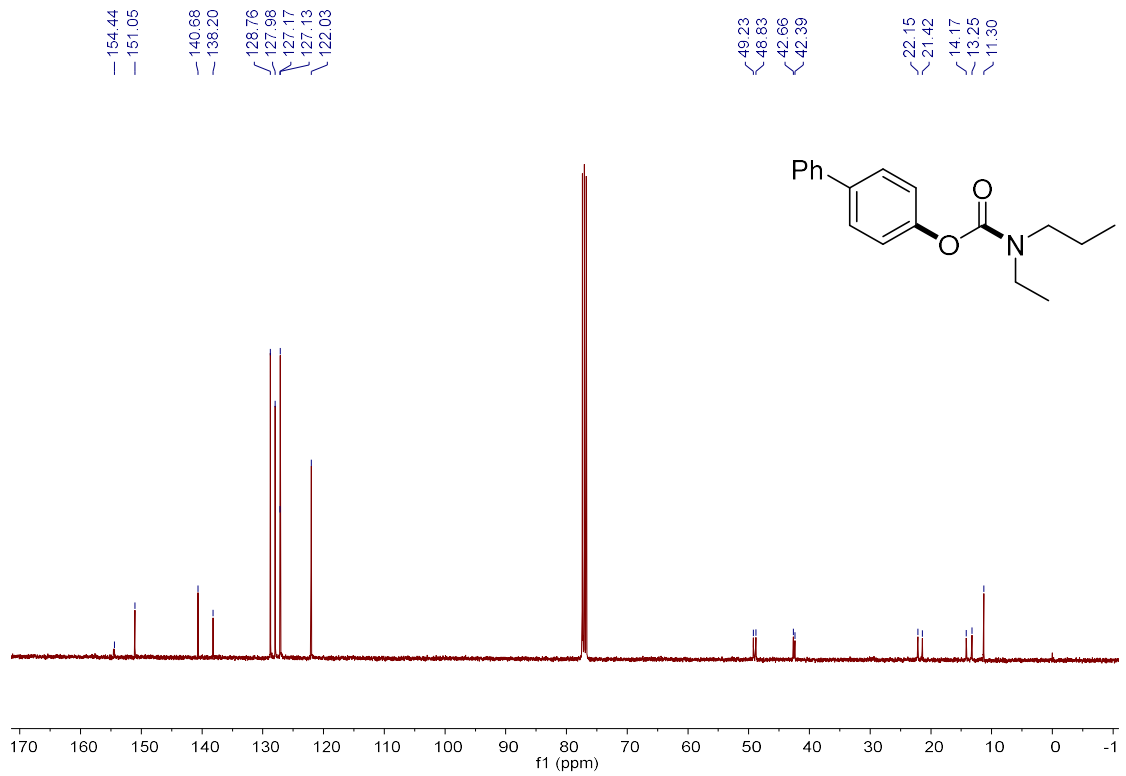

### [1,1'-Biphenyl]-4-yl benzyl(butyl)carbamate (3am)

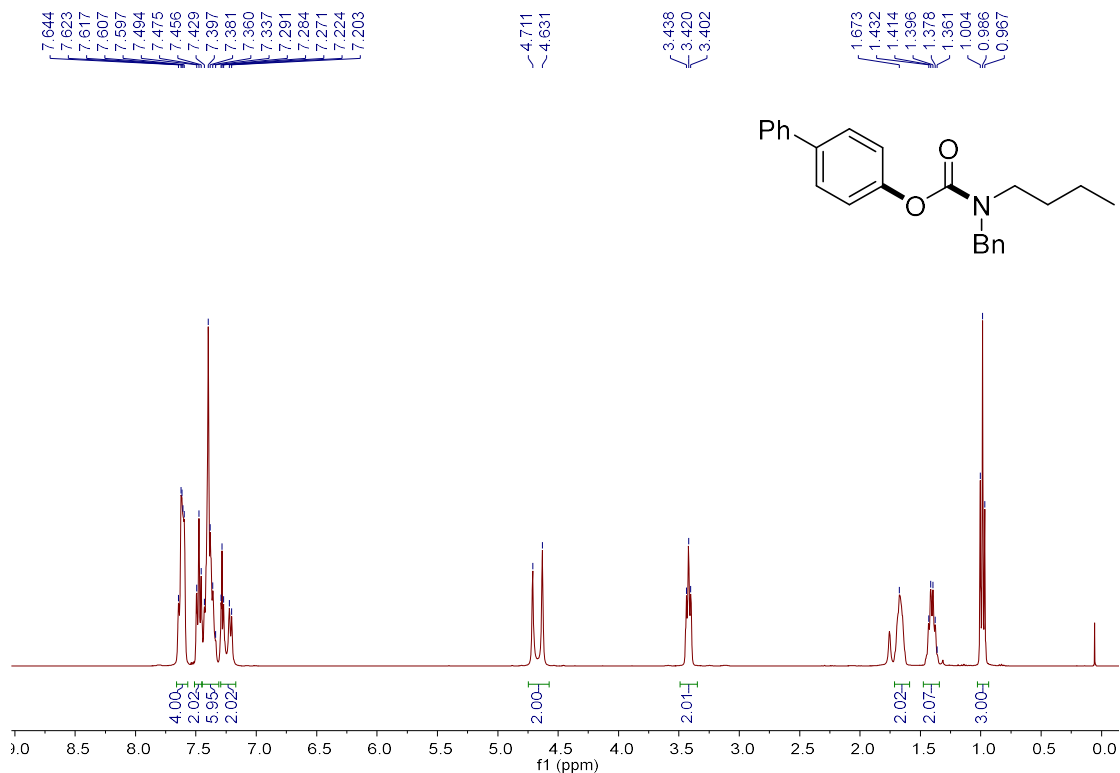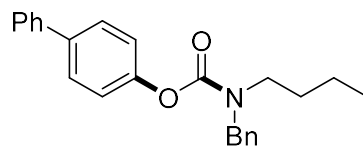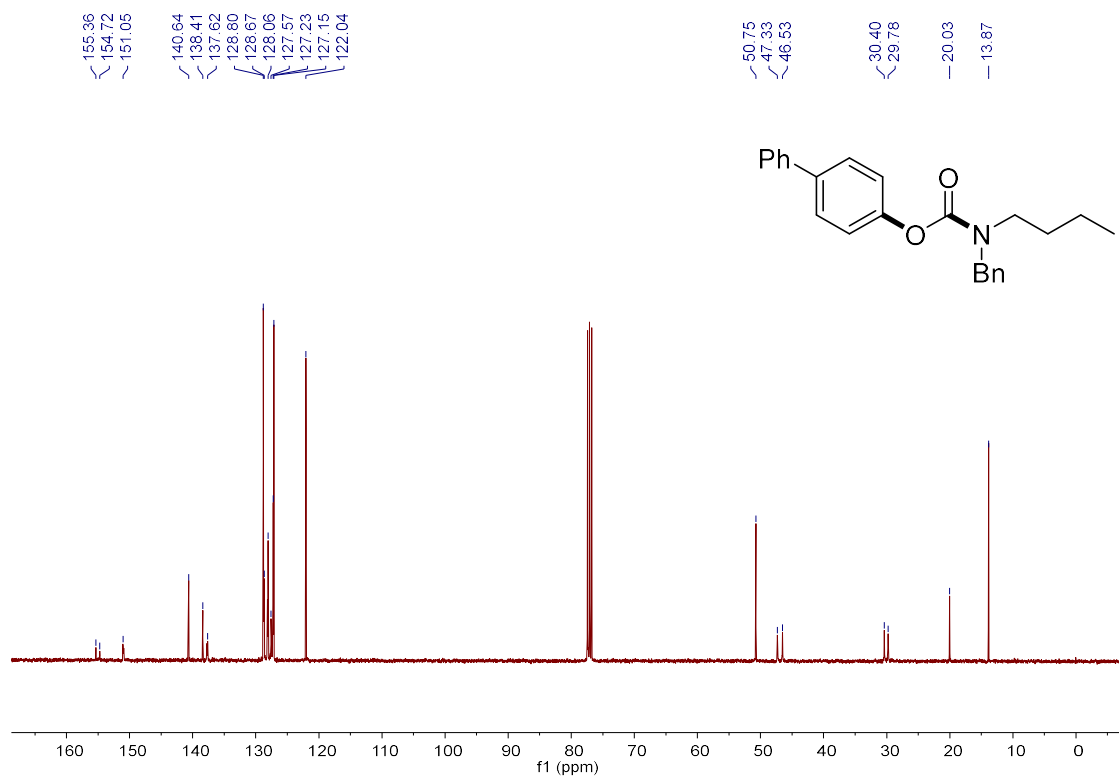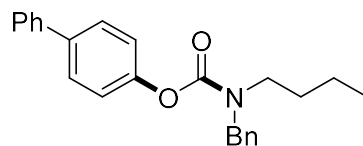

[1,1'-Biphenyl]-4-yl benzyl(isopropyl)carbamate (3an)

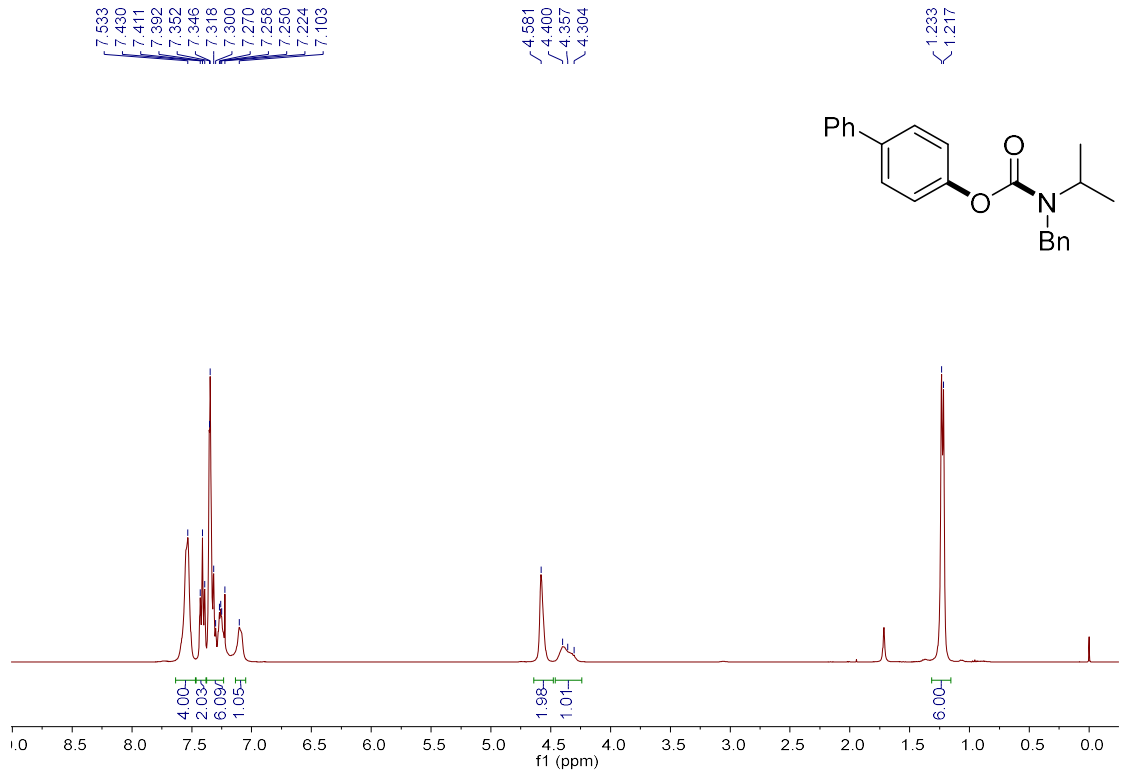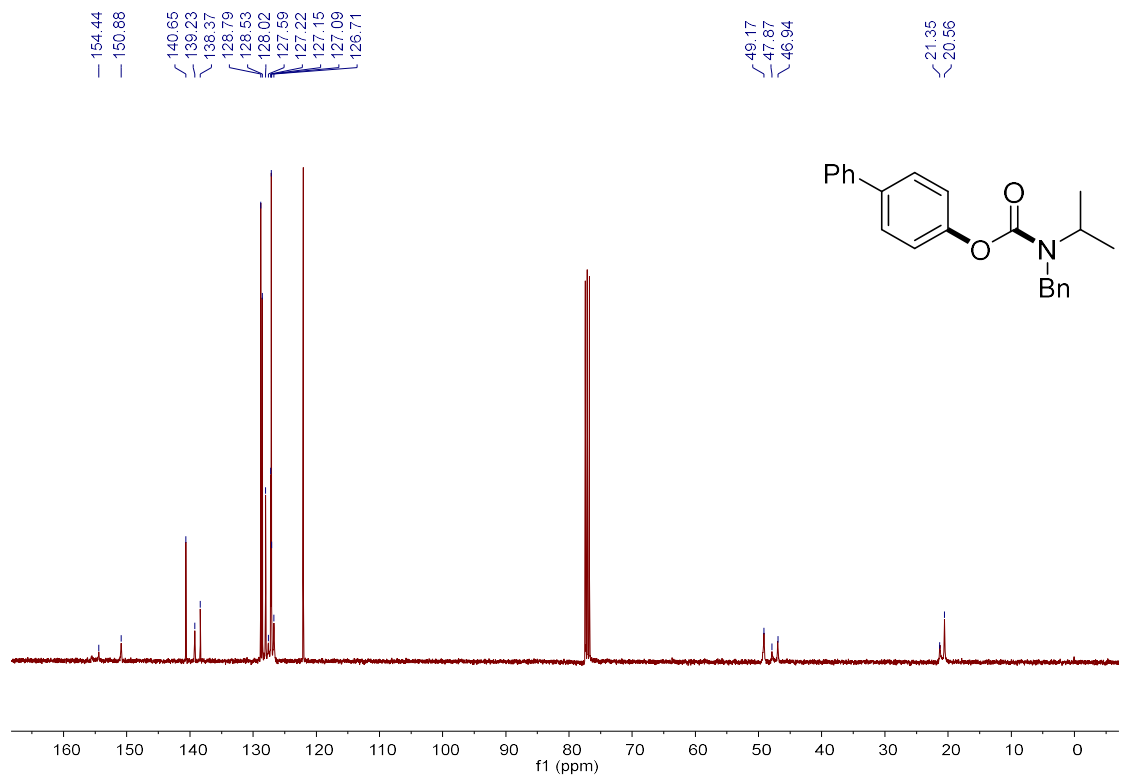

Ethyl N-([1,1'-biphenyl]-4-yloxy)carbonyl)-N-benzylglycinate (3ao)

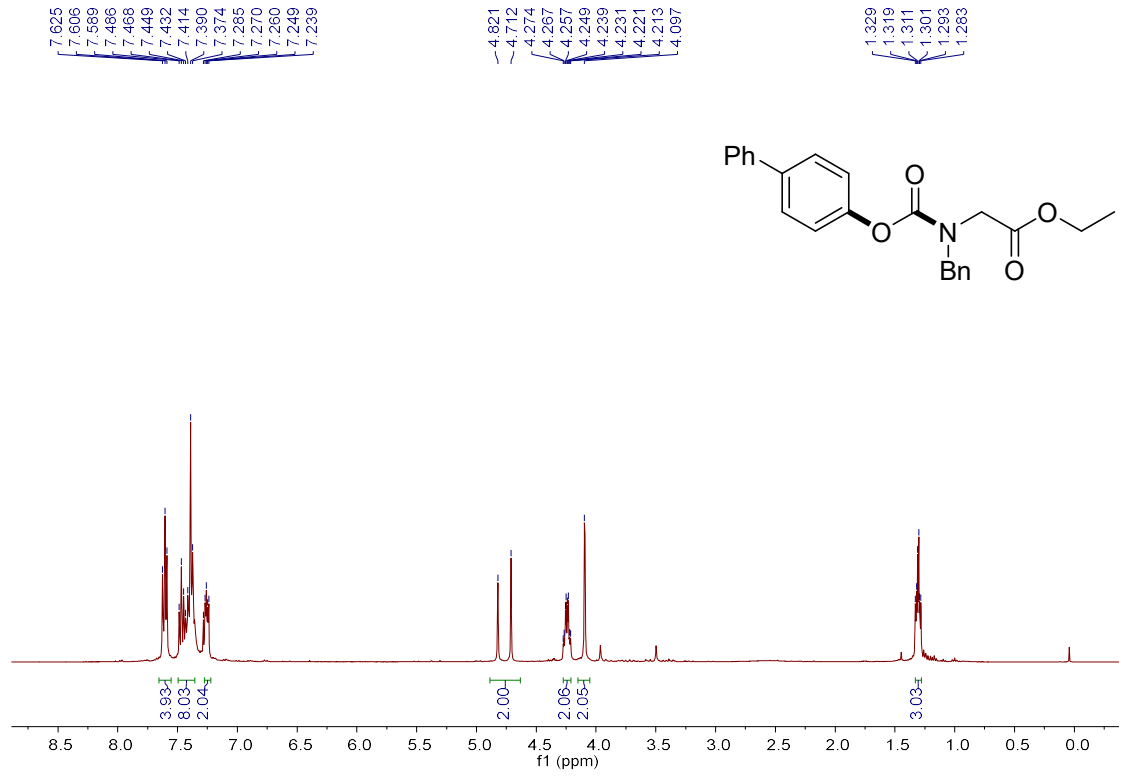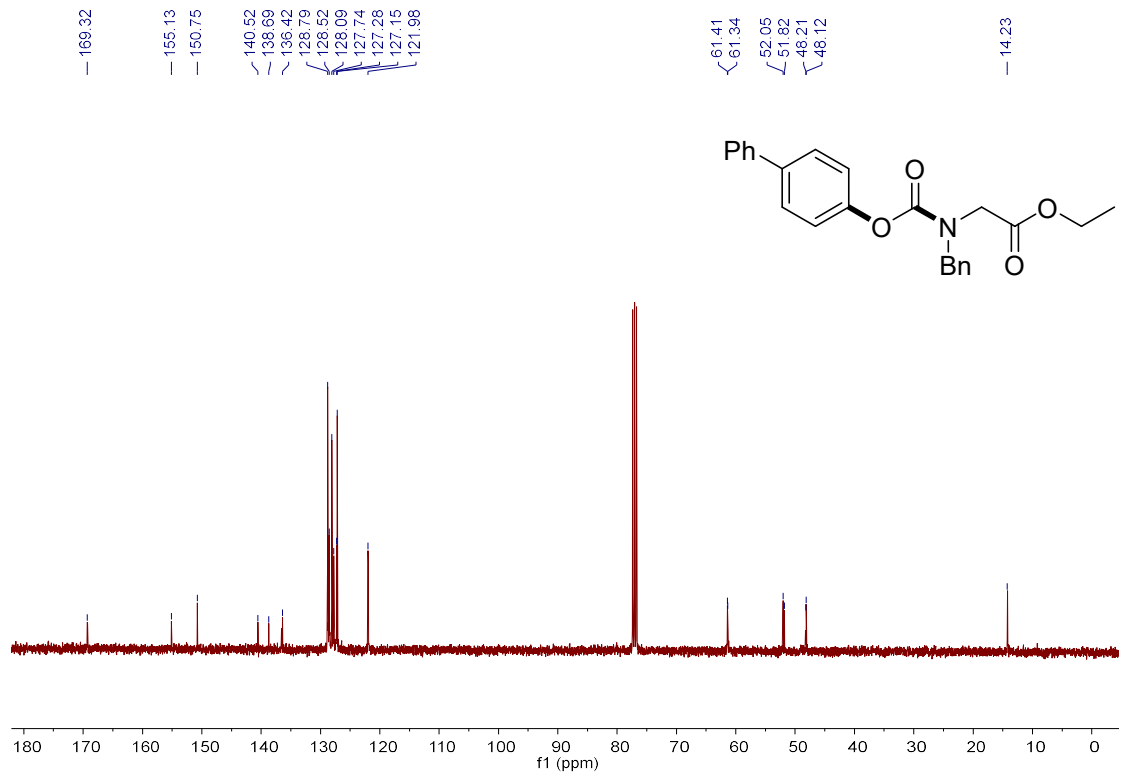

**[1,1'-Biphenyl]-4-ylmethyl(3-phenyl-3-(4-(trifluoromethyl)phenoxy)propyl)carb-amate (3ap)**

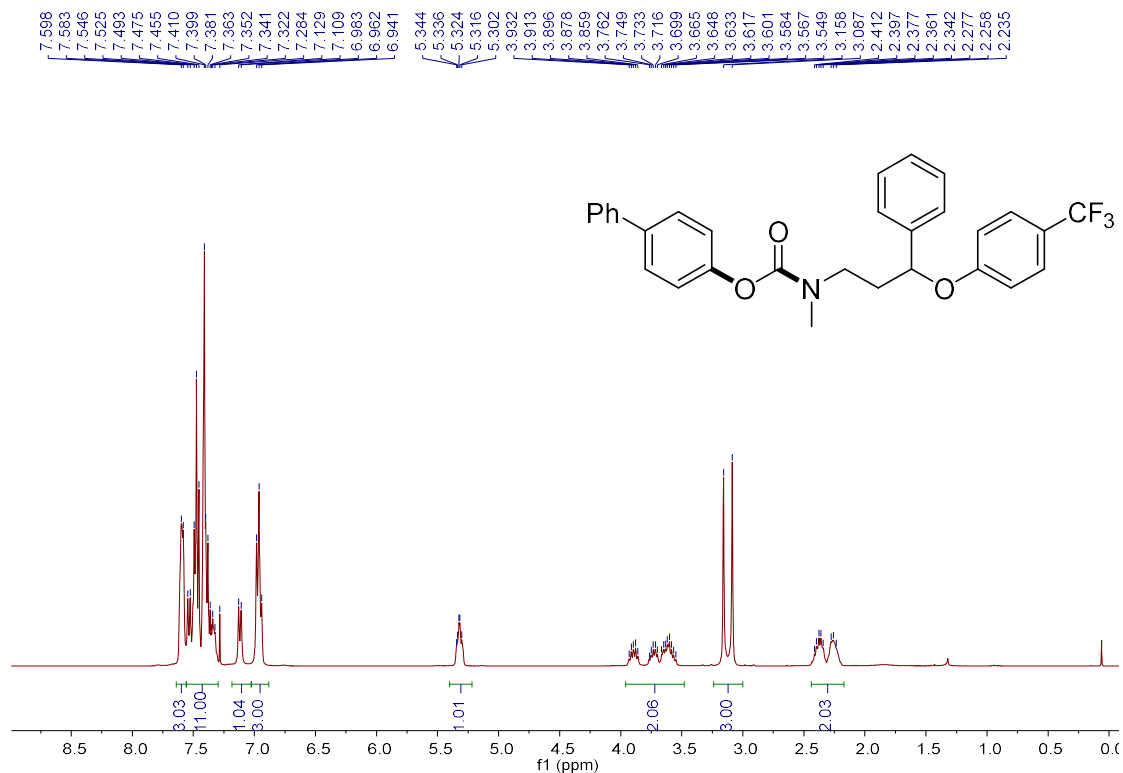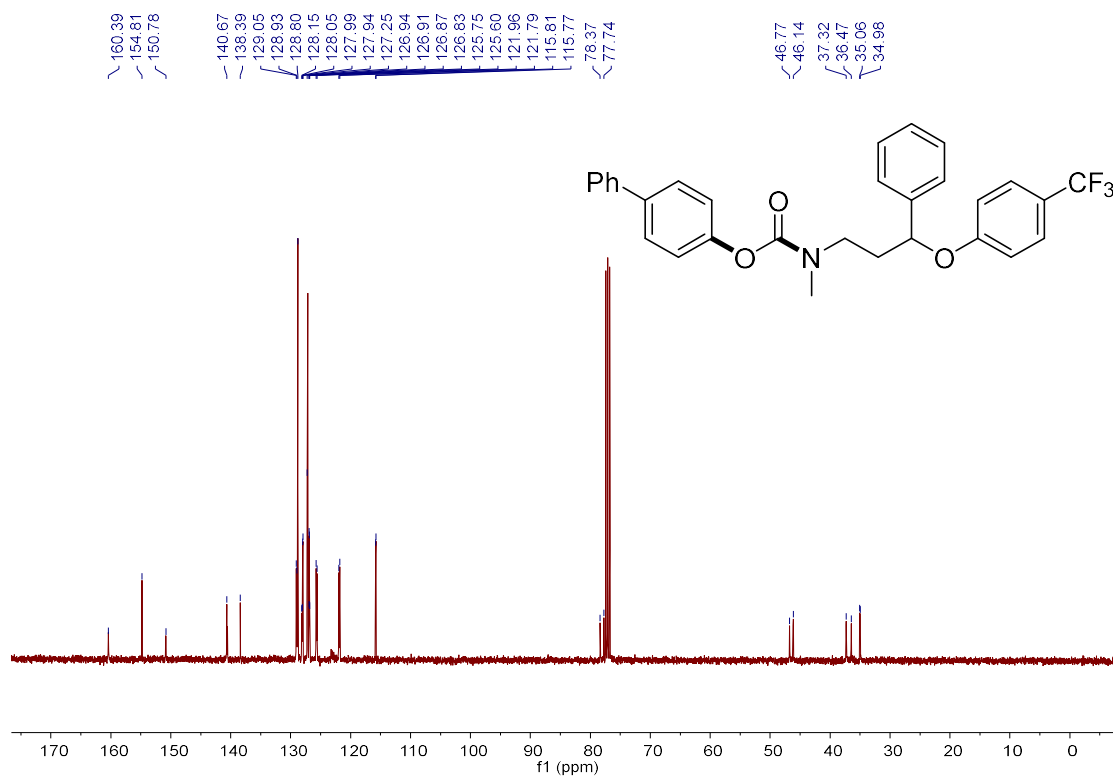

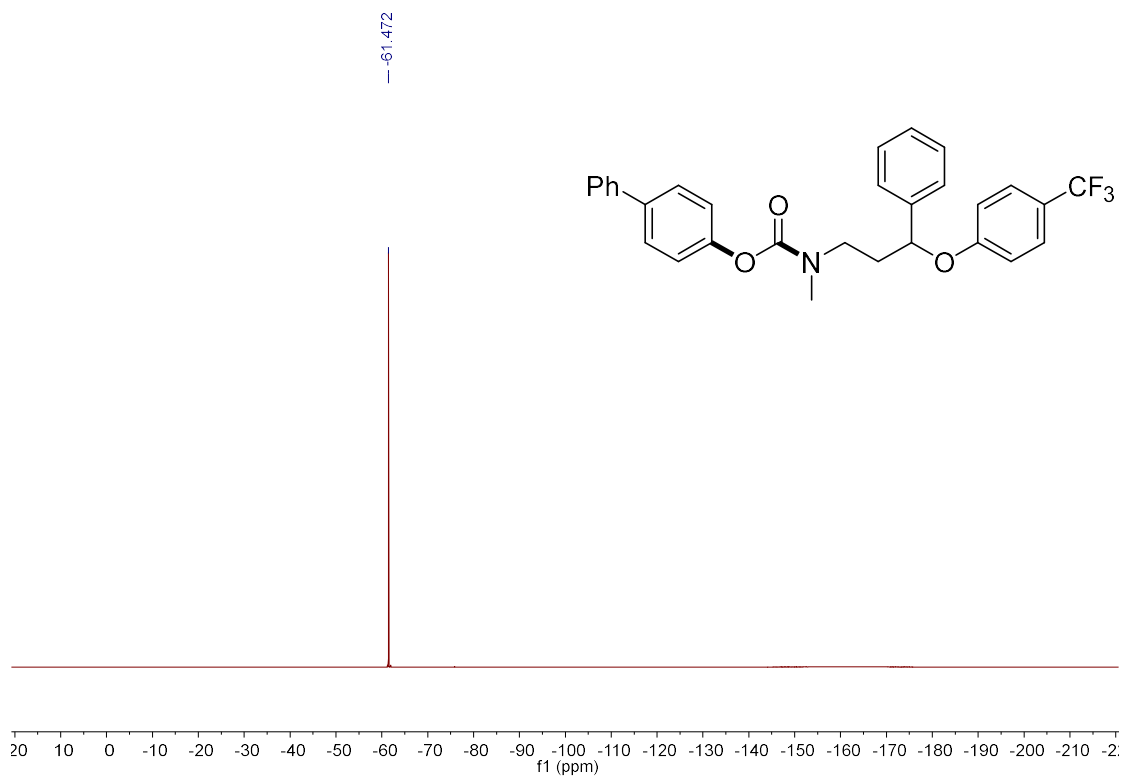

***p*-Tolyl diethylcarbamate (3ba)**

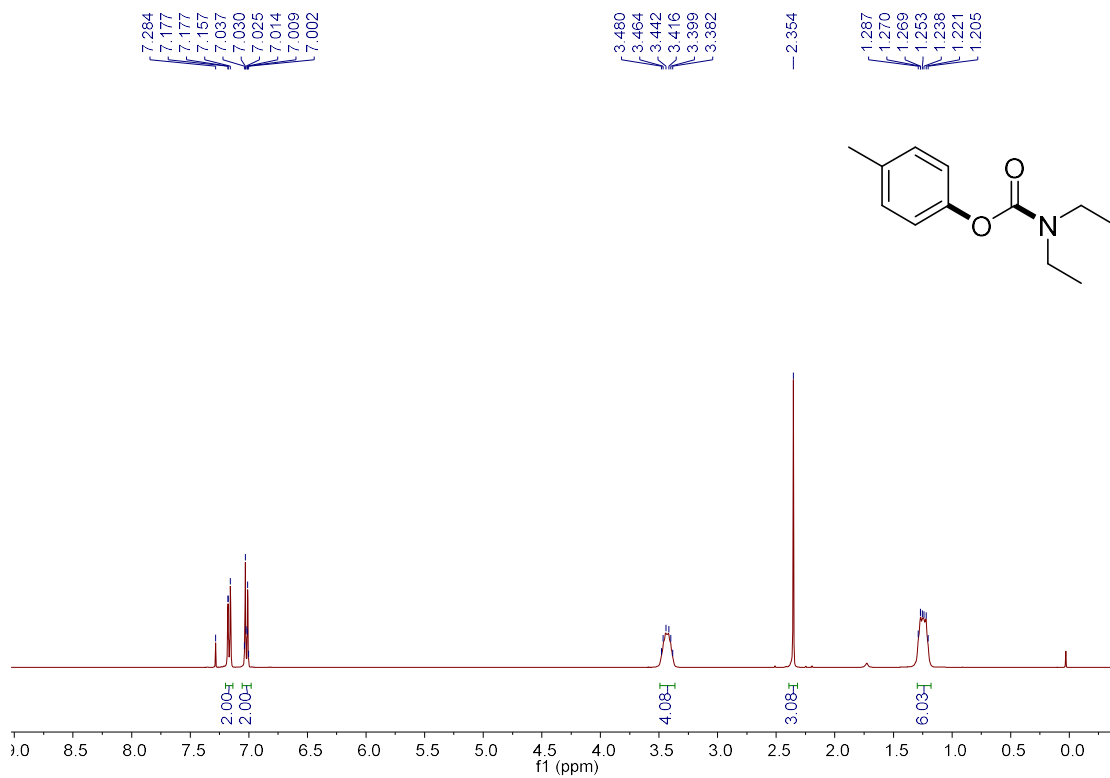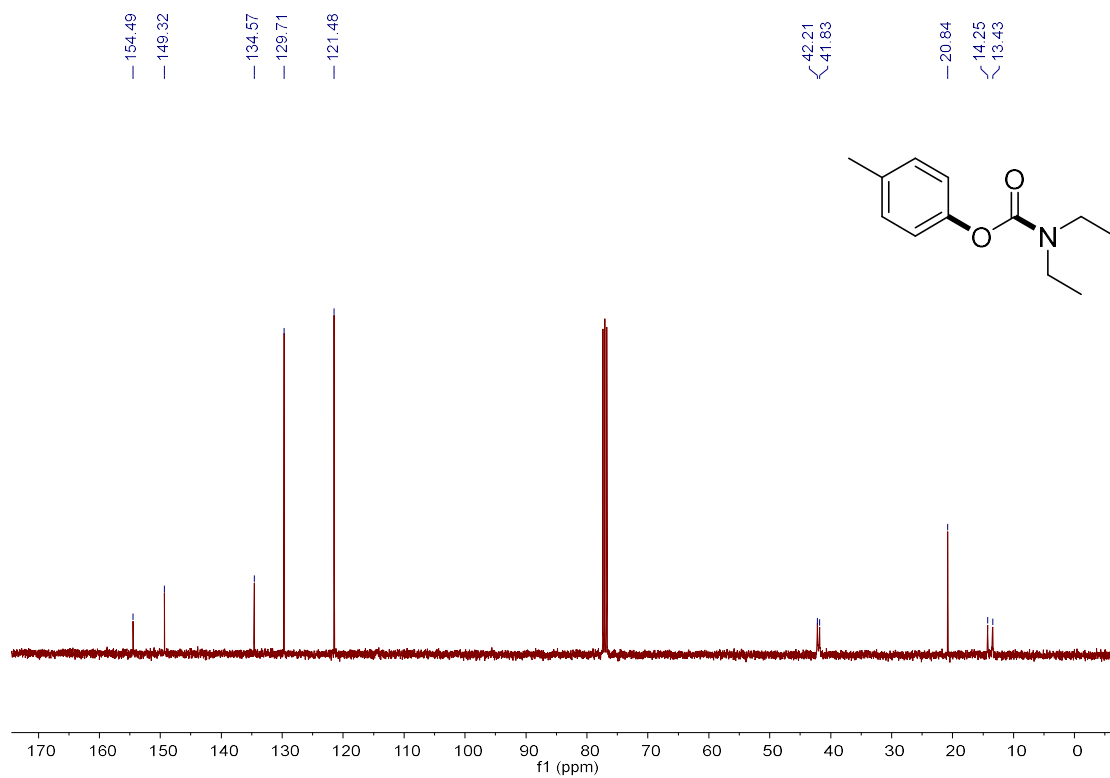



### Phenyl diethylcarbamate (3ca)

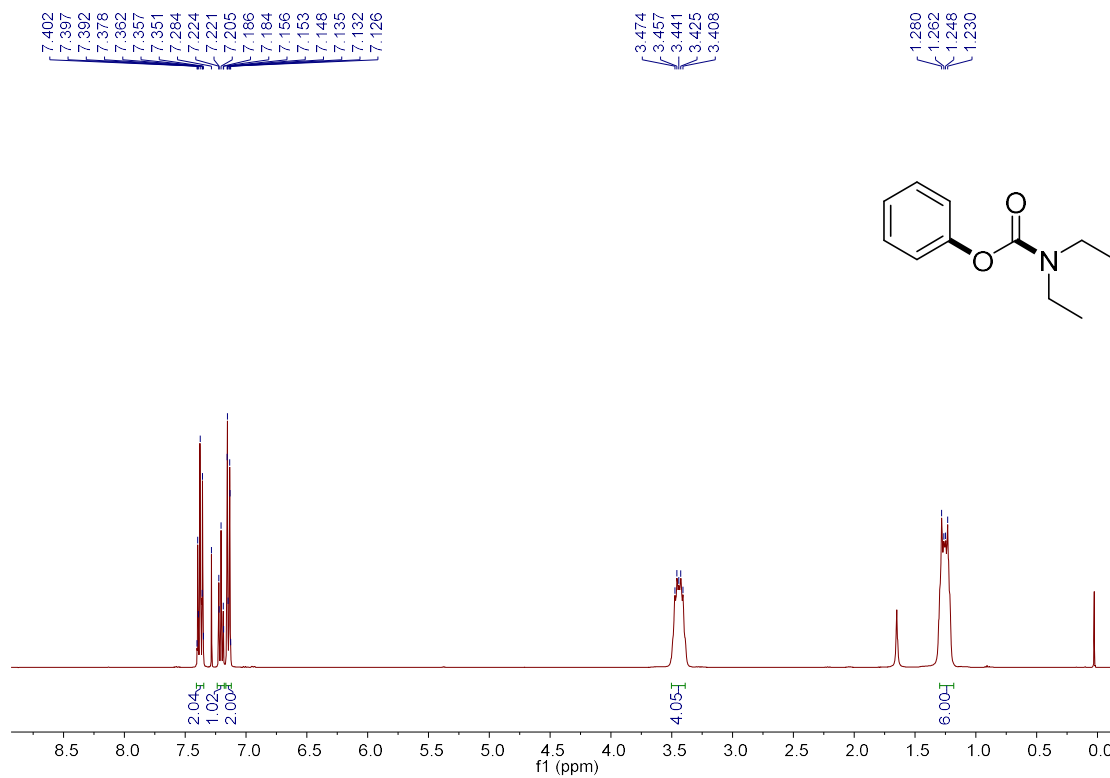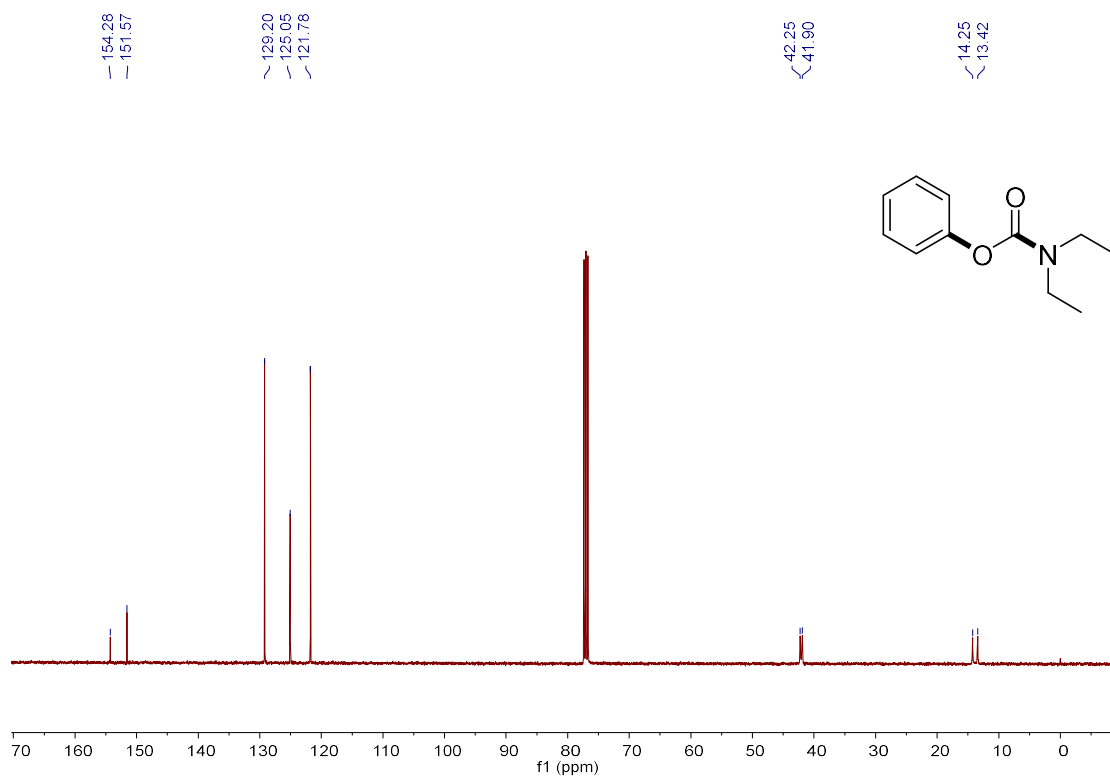

### 4-Methoxyphenyl diethylcarbamate (3da)

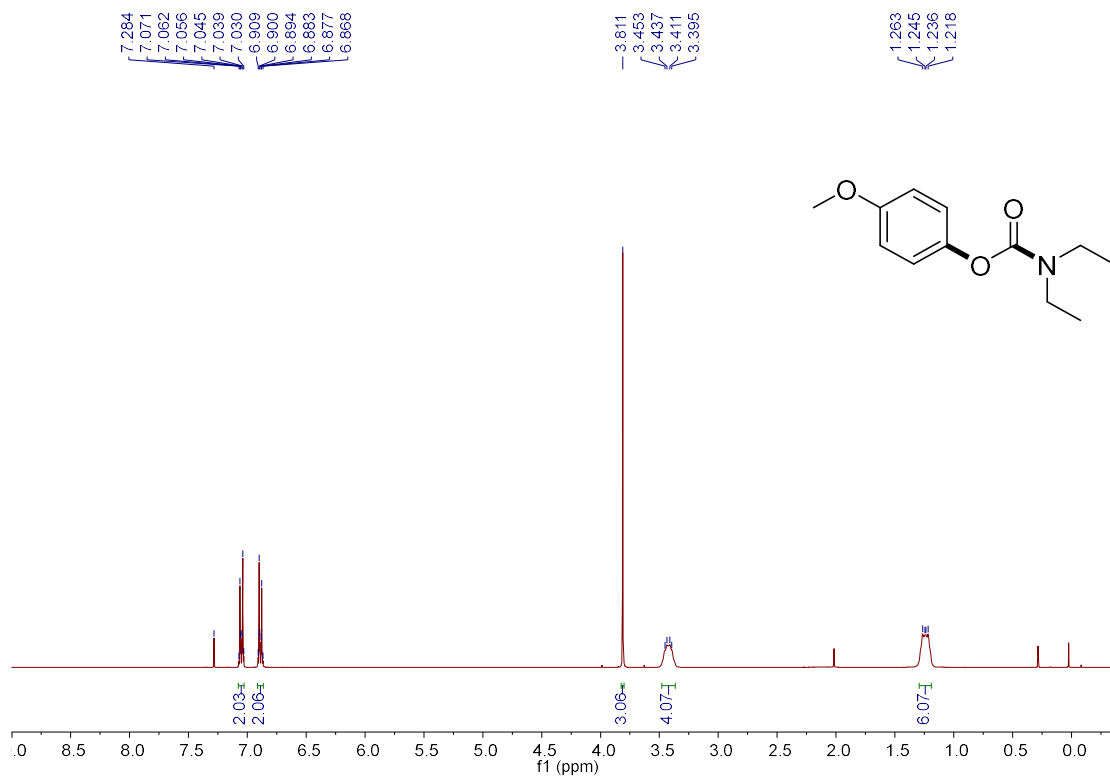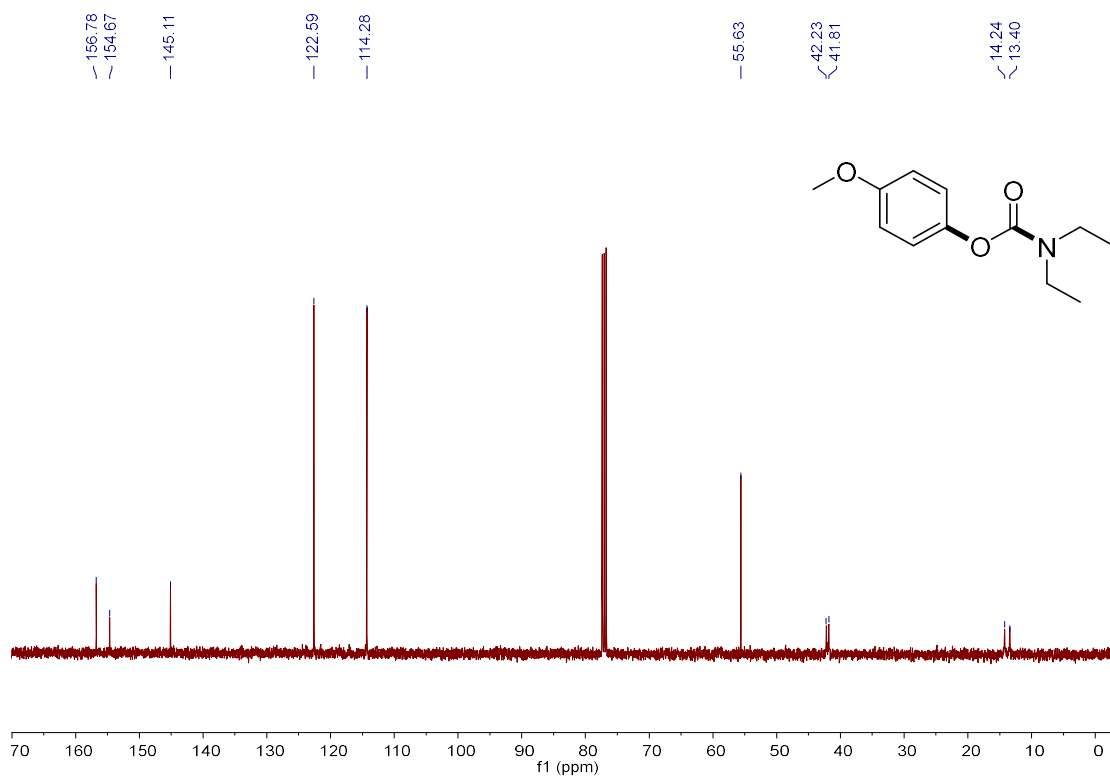

### 4-Phenoxyphenyl diethylcarbamate (3ea)

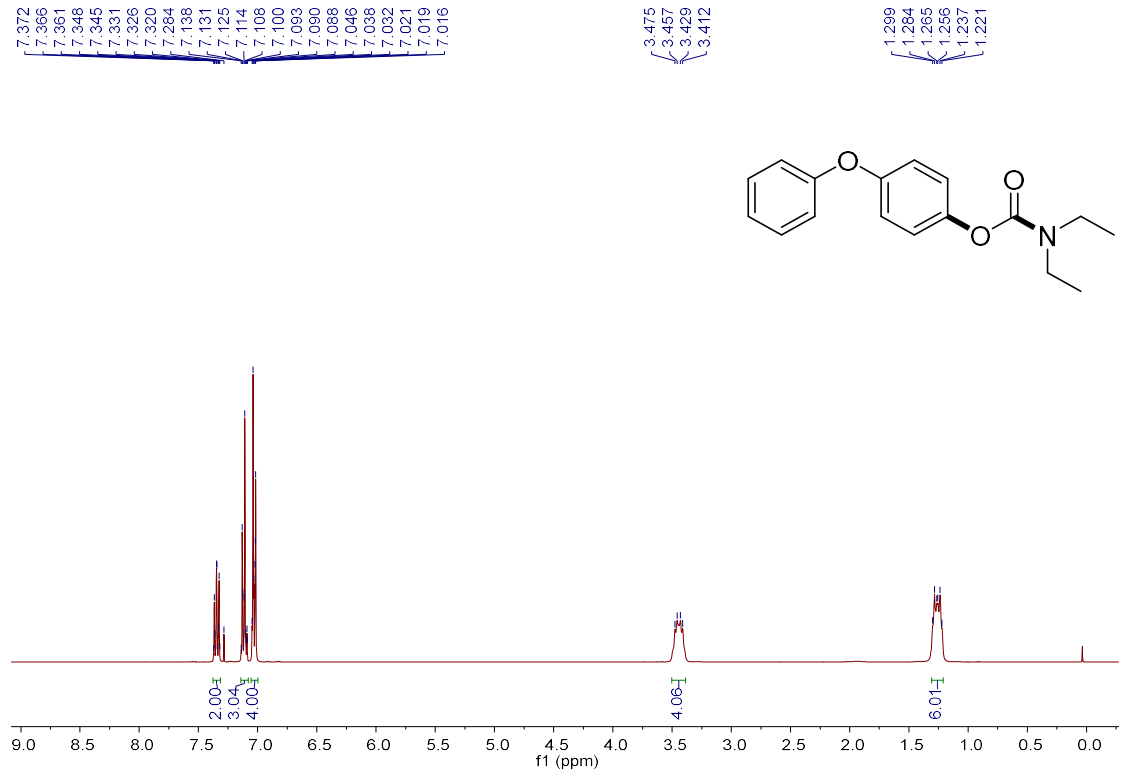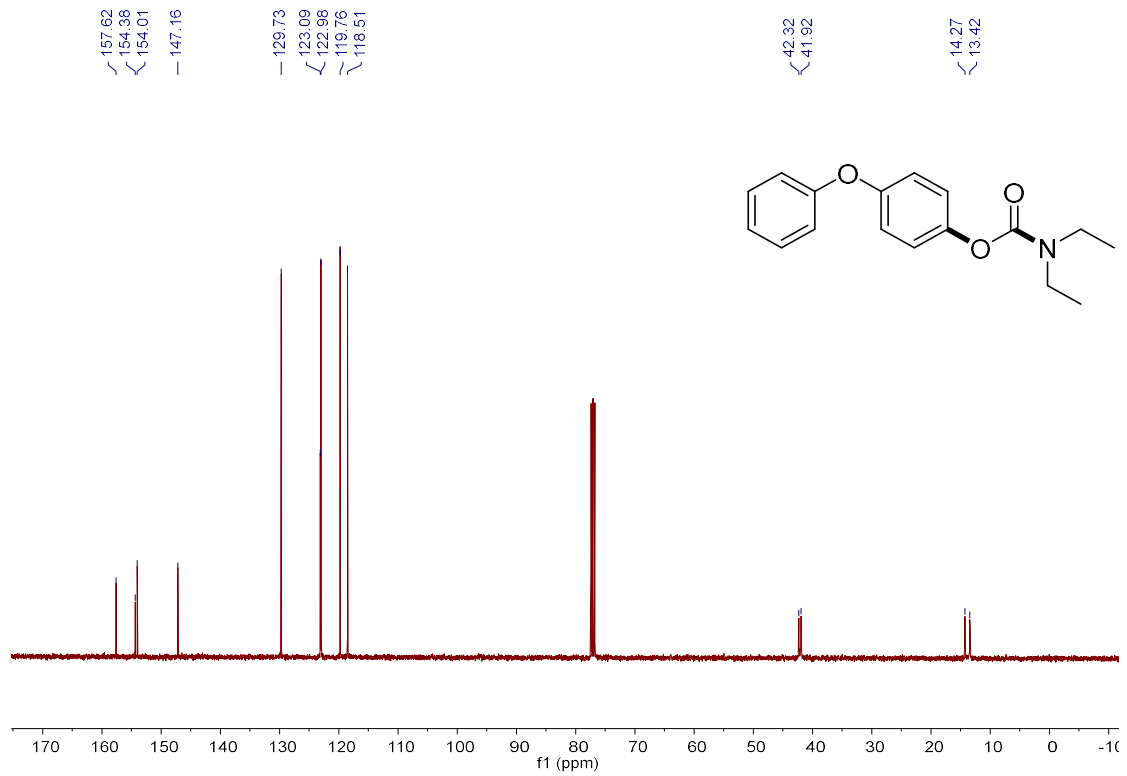

4-(4-Bromophenoxy)phenyl diethylcarbamate (3fa)

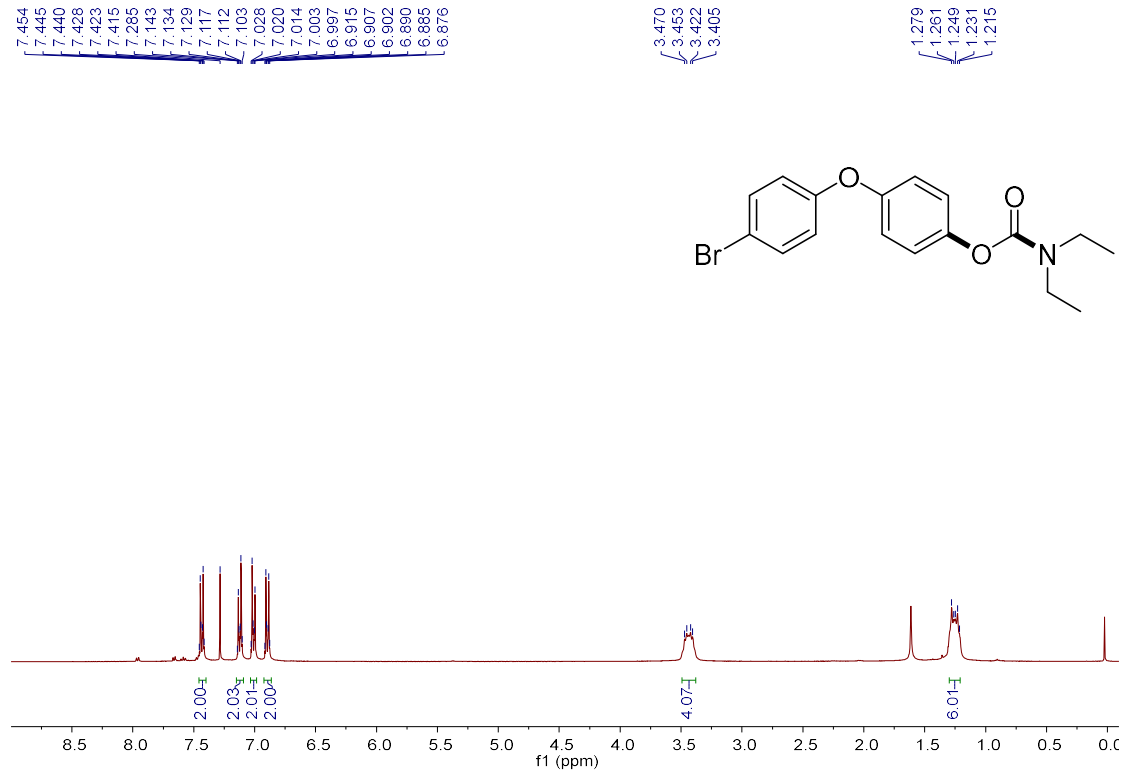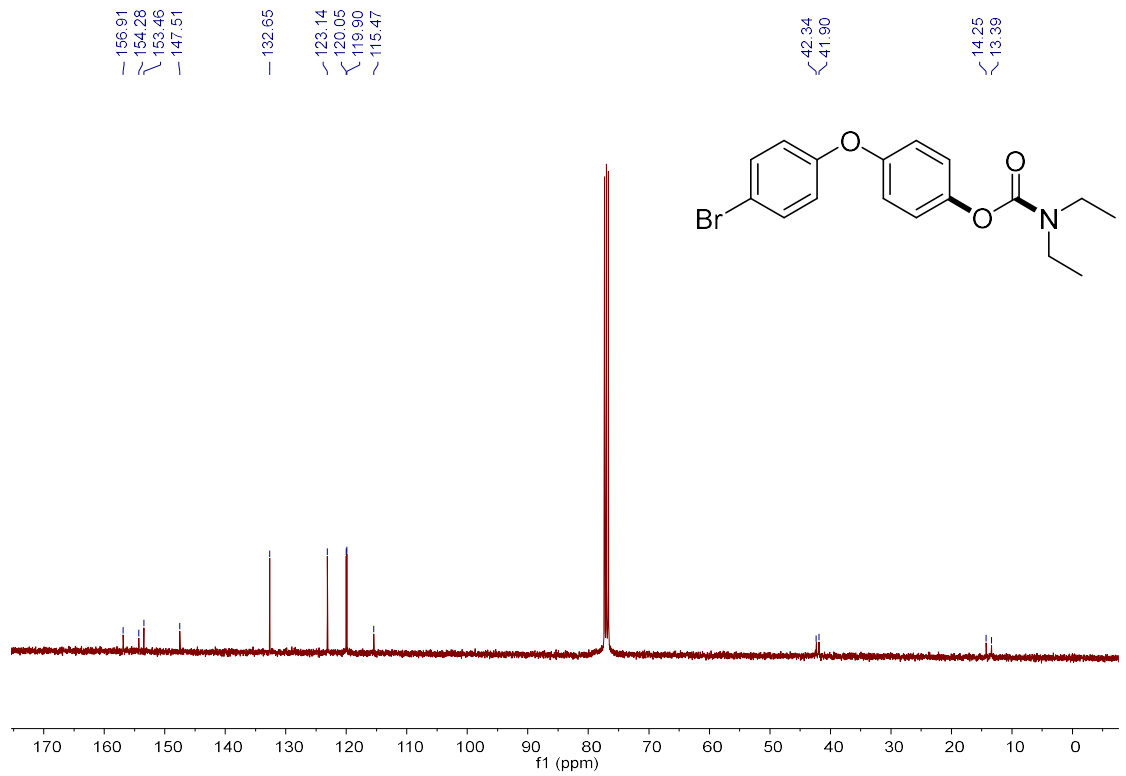

### 4-Fluorophenyl diethylcarbamate (3ga)

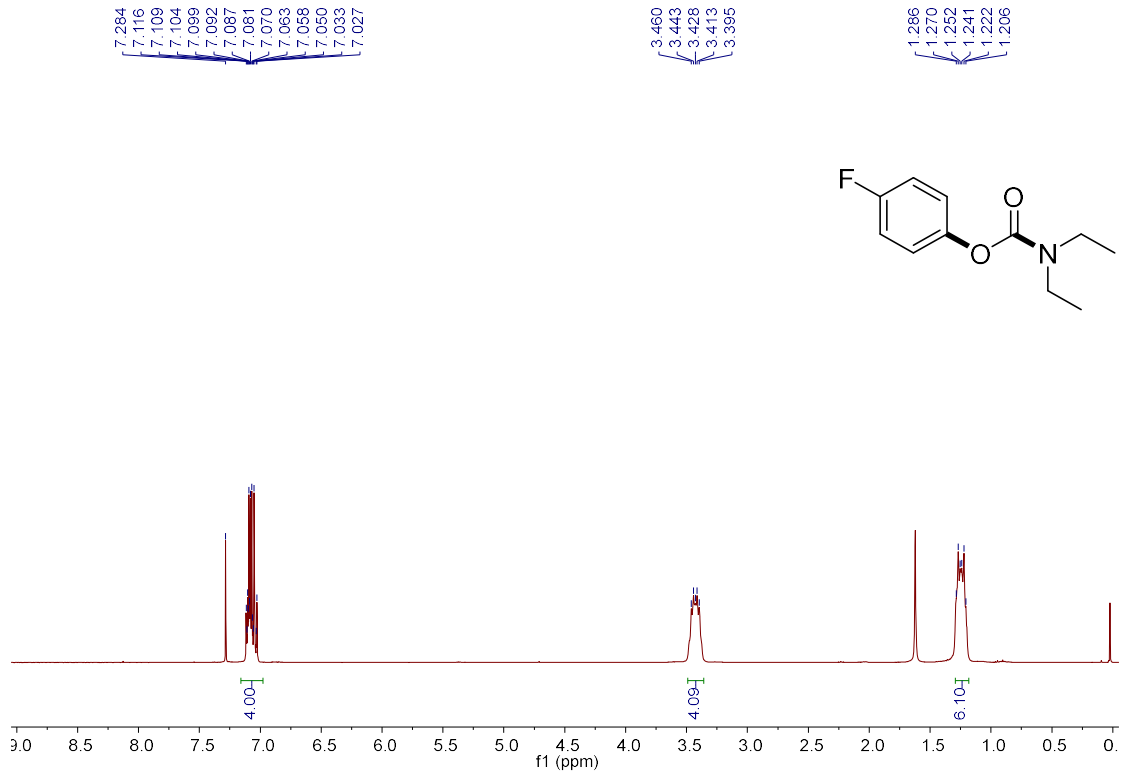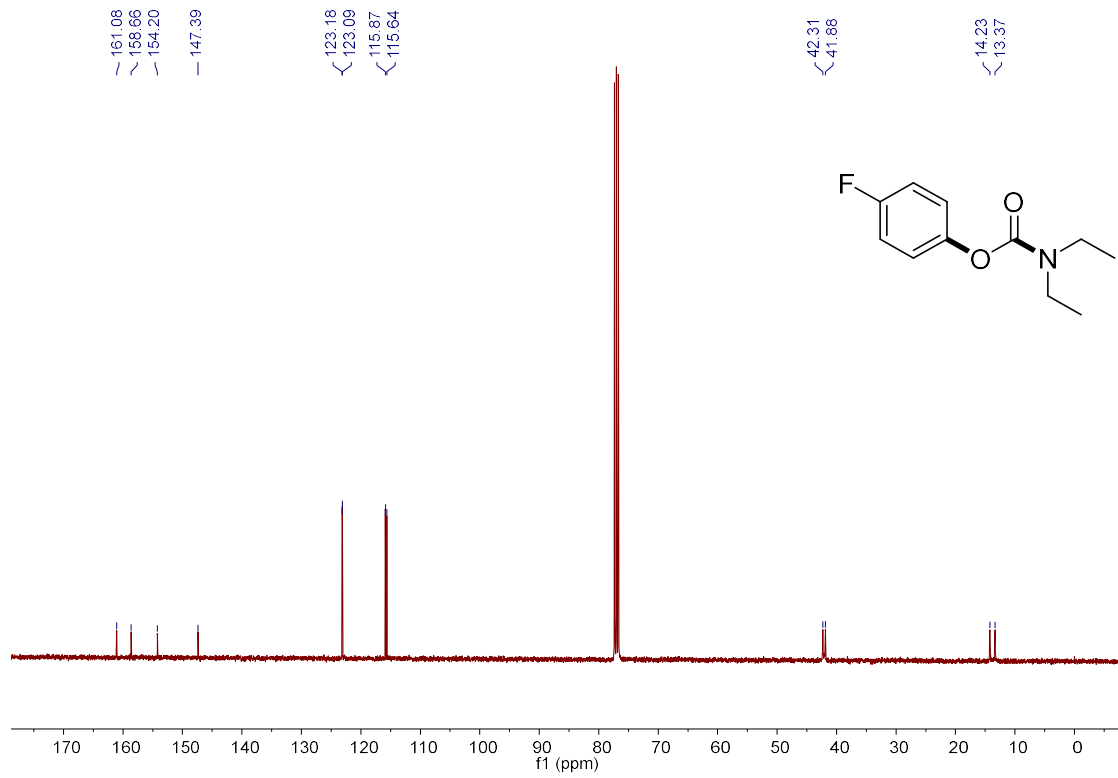

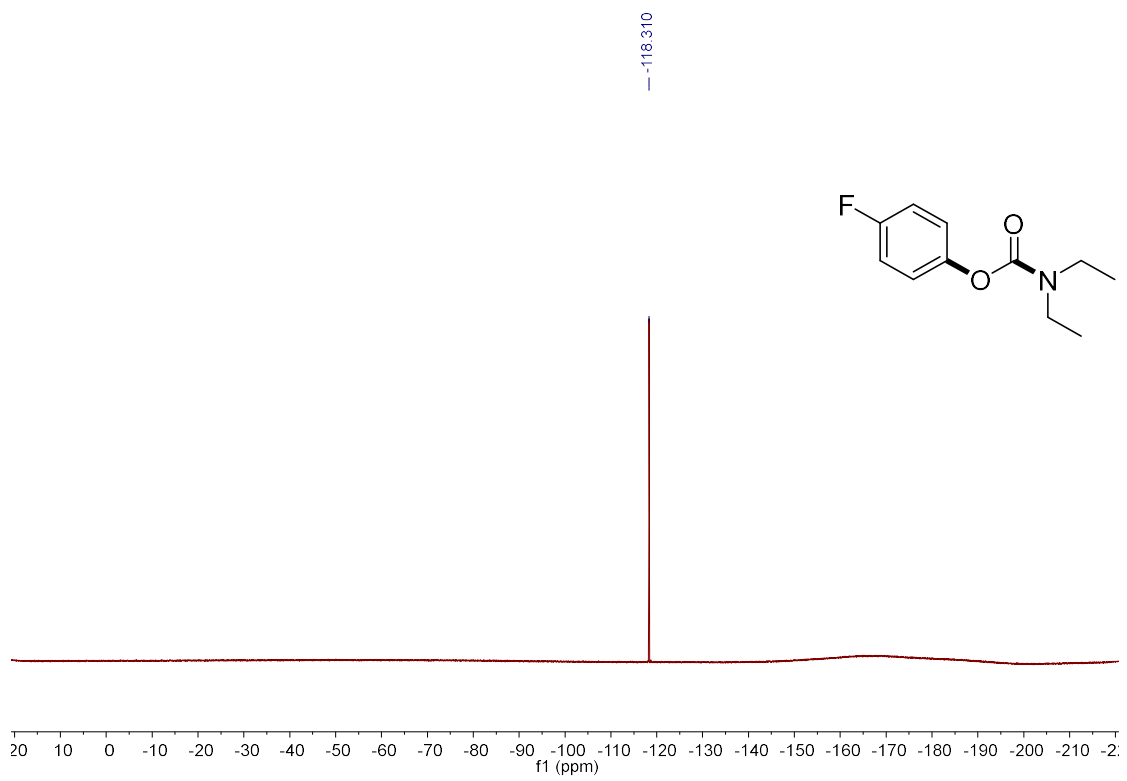

### 4-Chlorophenyl diethylcarbamate (3ha)

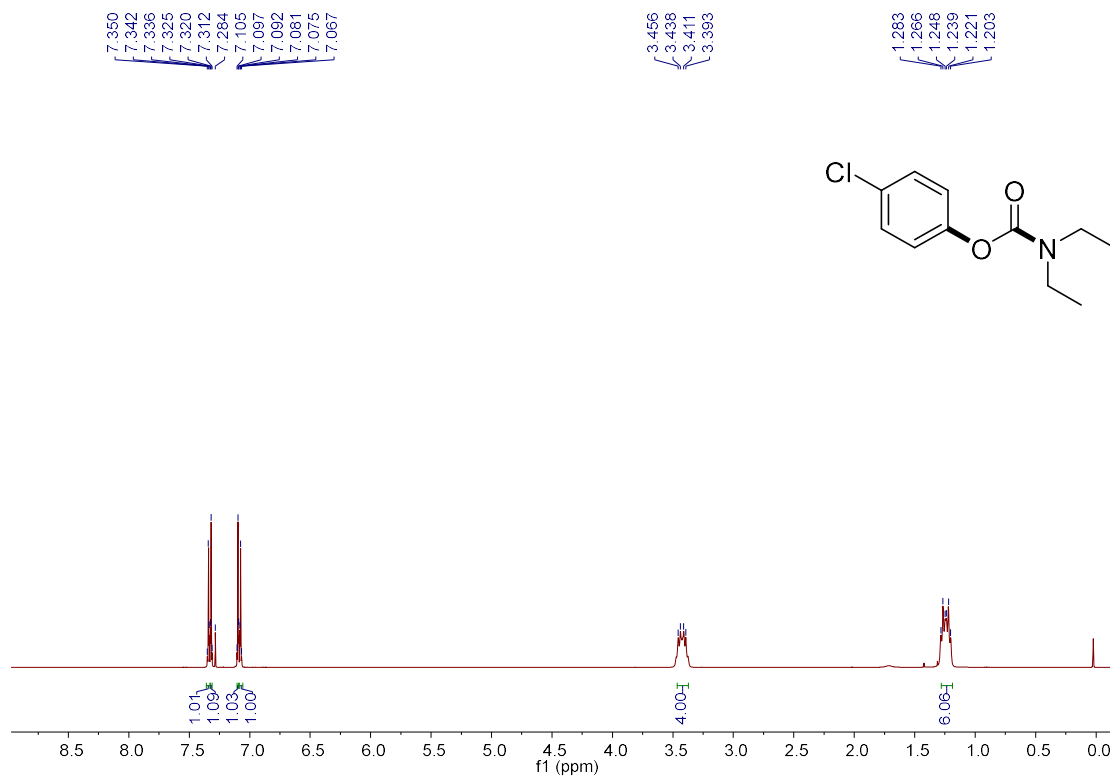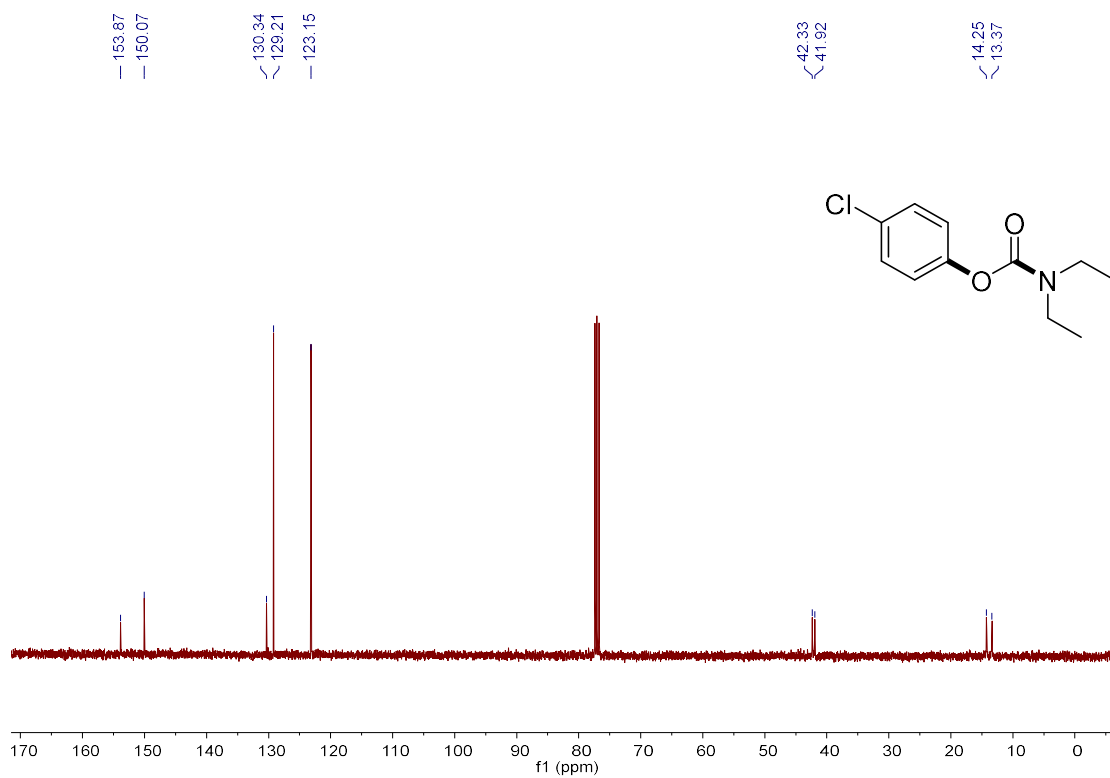

### 4-Iodophenyl diethylcarbamate (3ia)

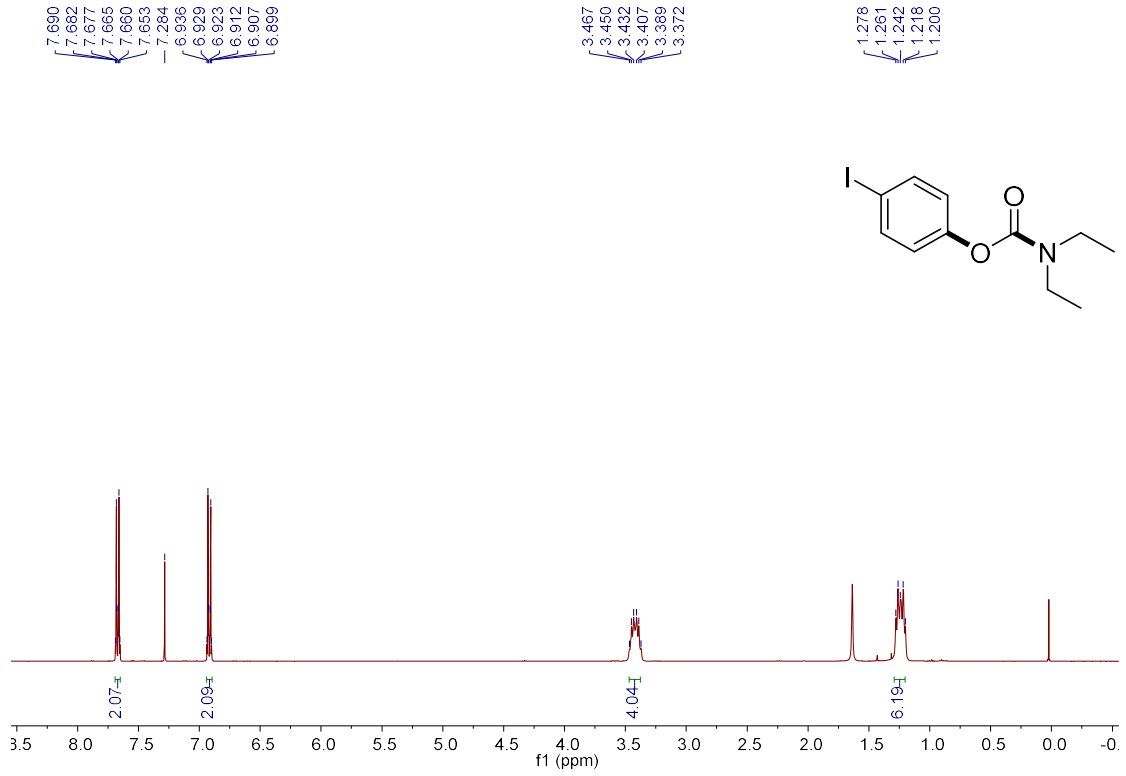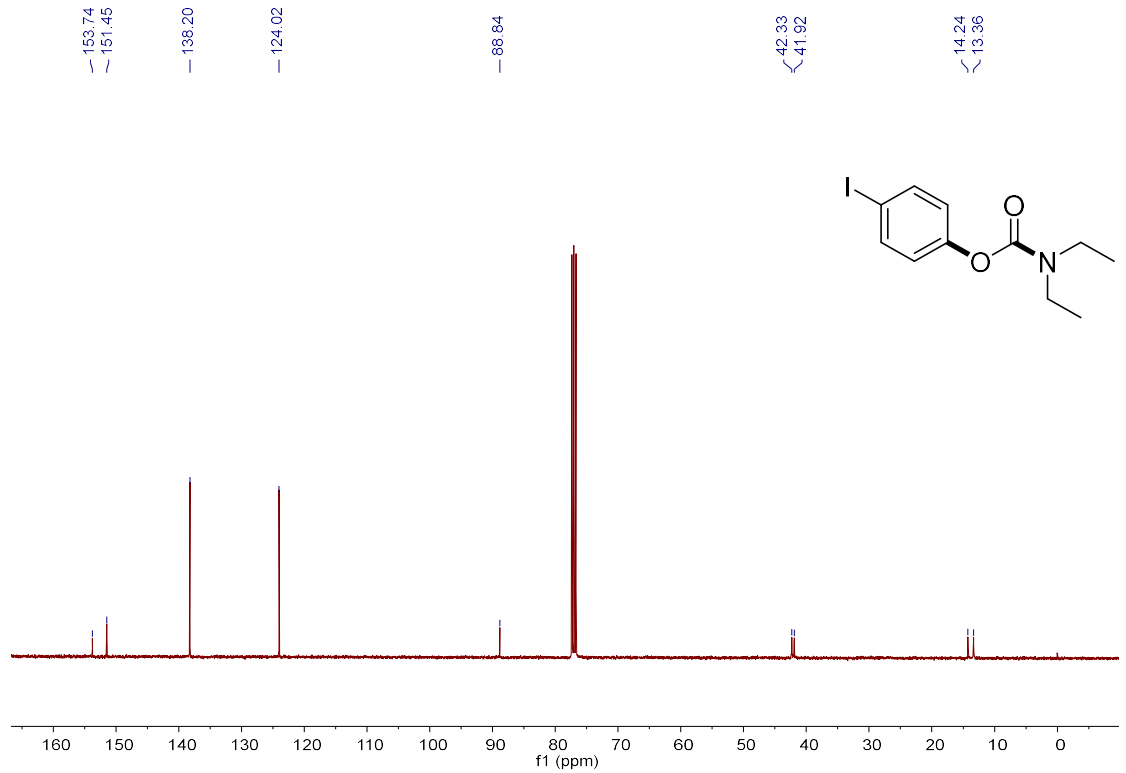



### Mesityl diethylcarbamate (3ja)

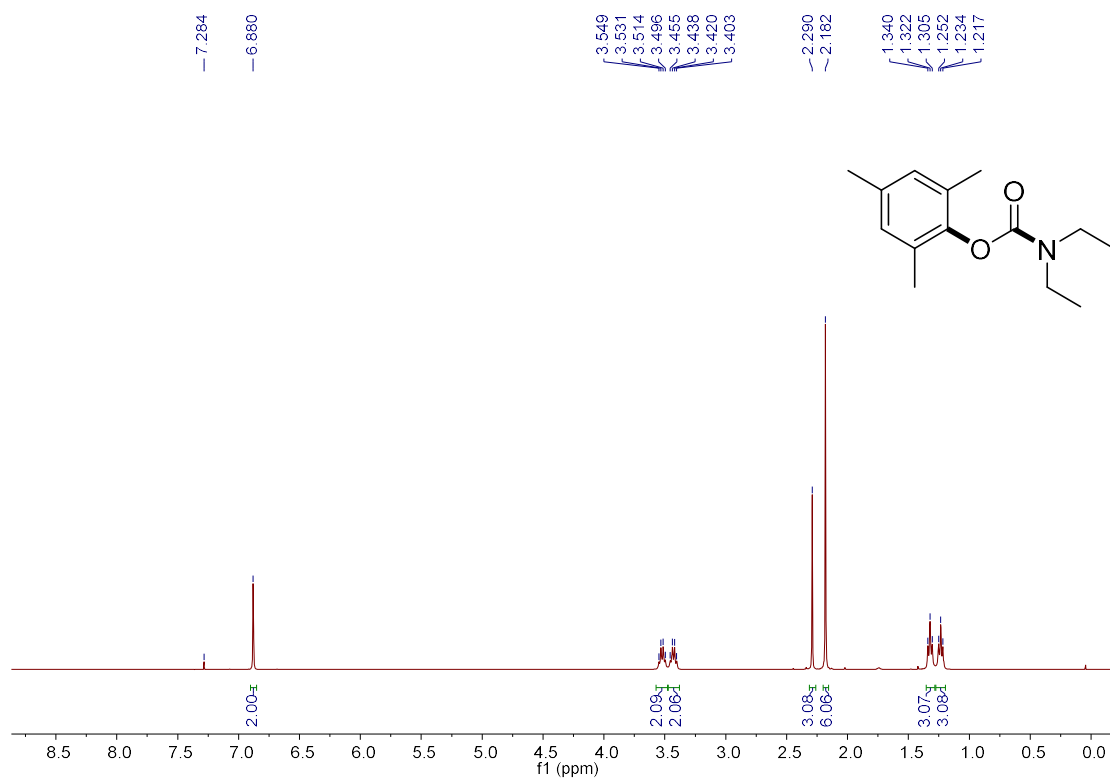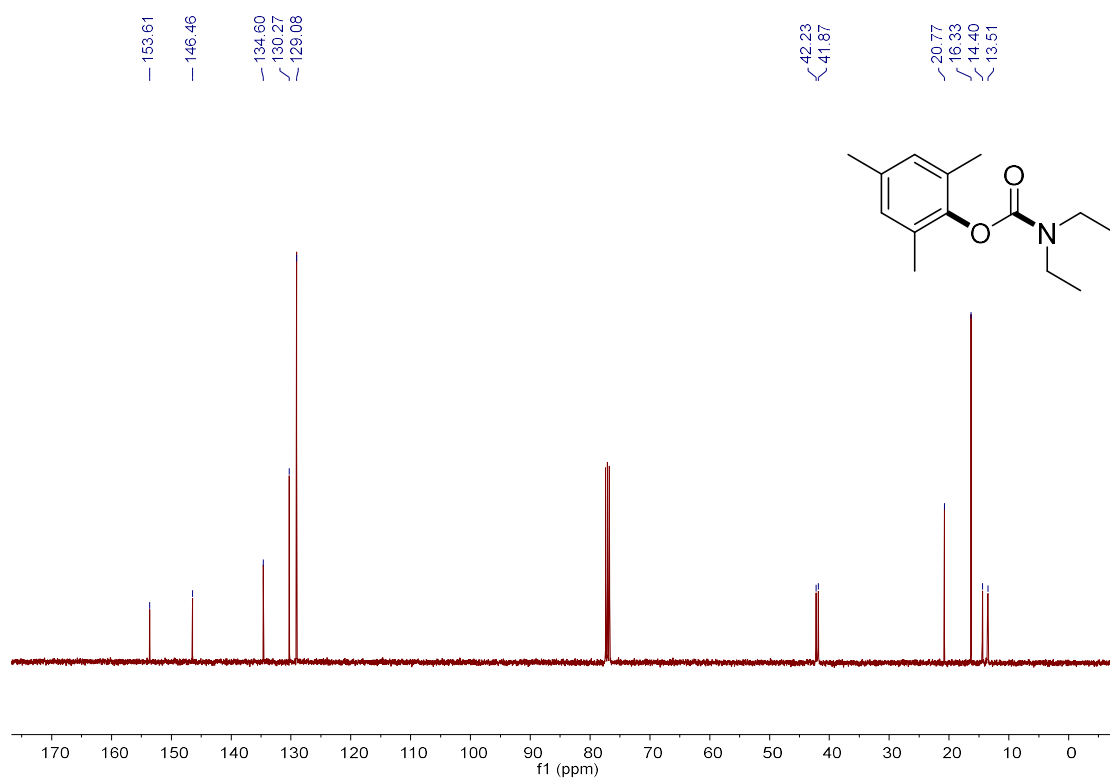

### 3,4-Dimethylphenyl diethylcarbamate (3ka)

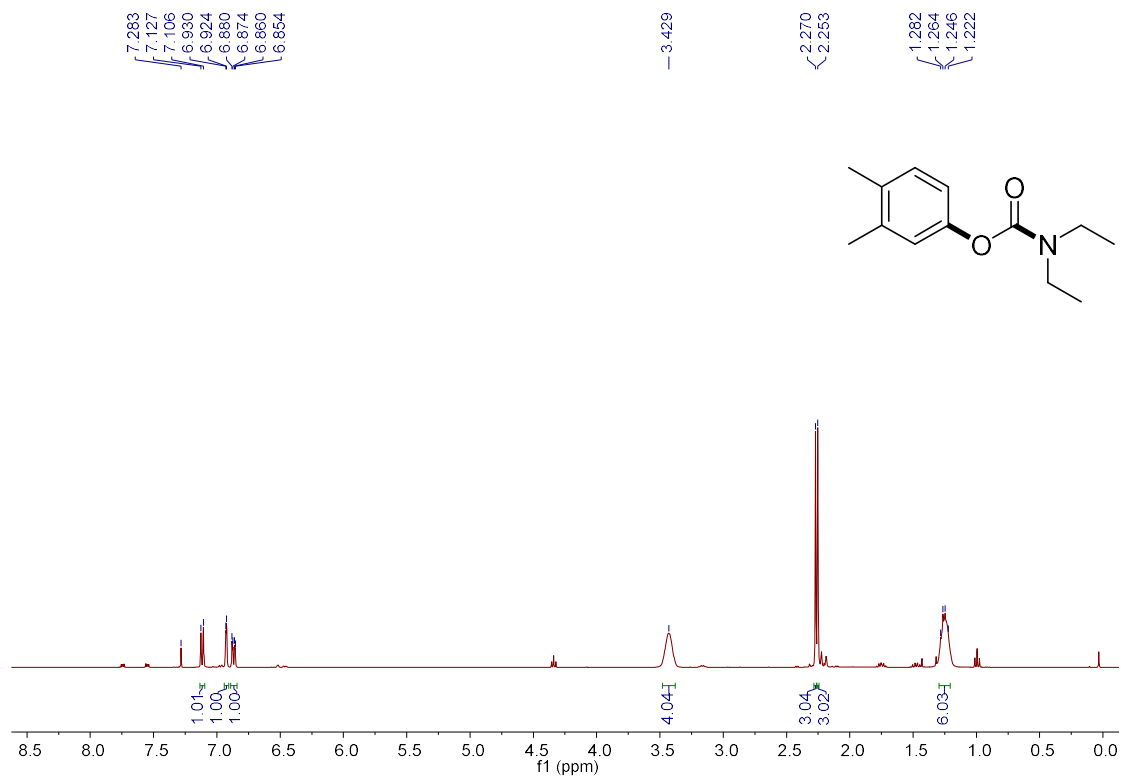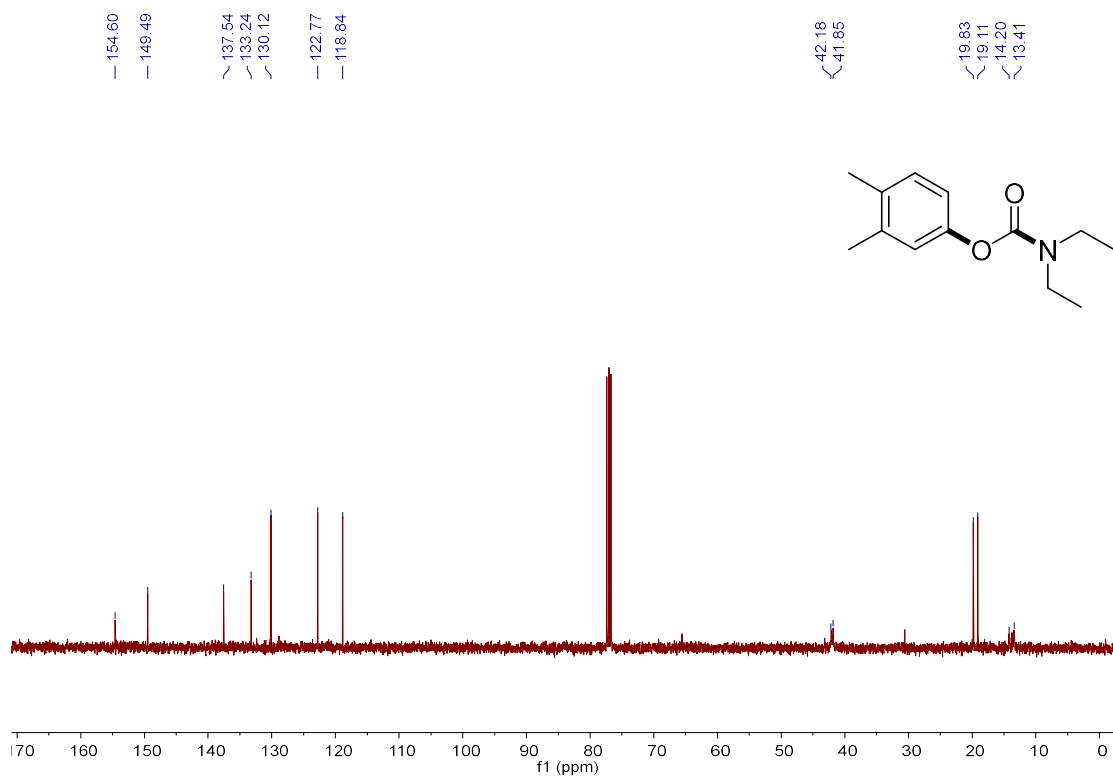

### 3-Fluoro-4-methoxyphenyl diethylcarbamate (31a)

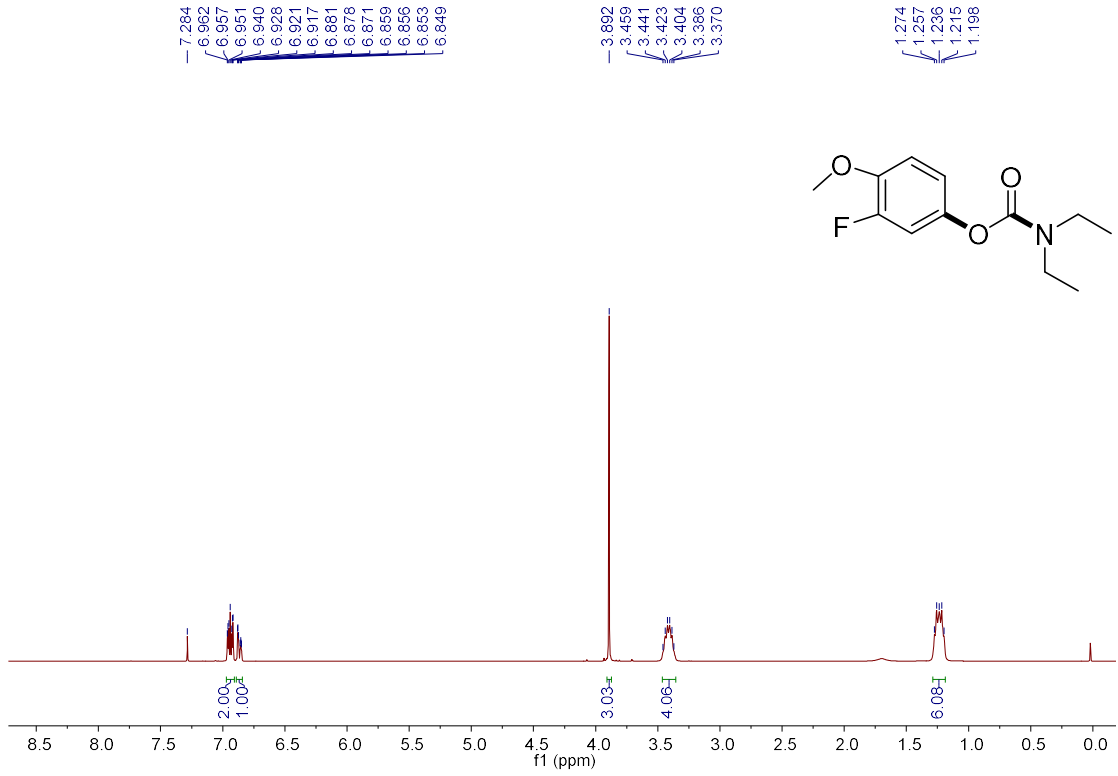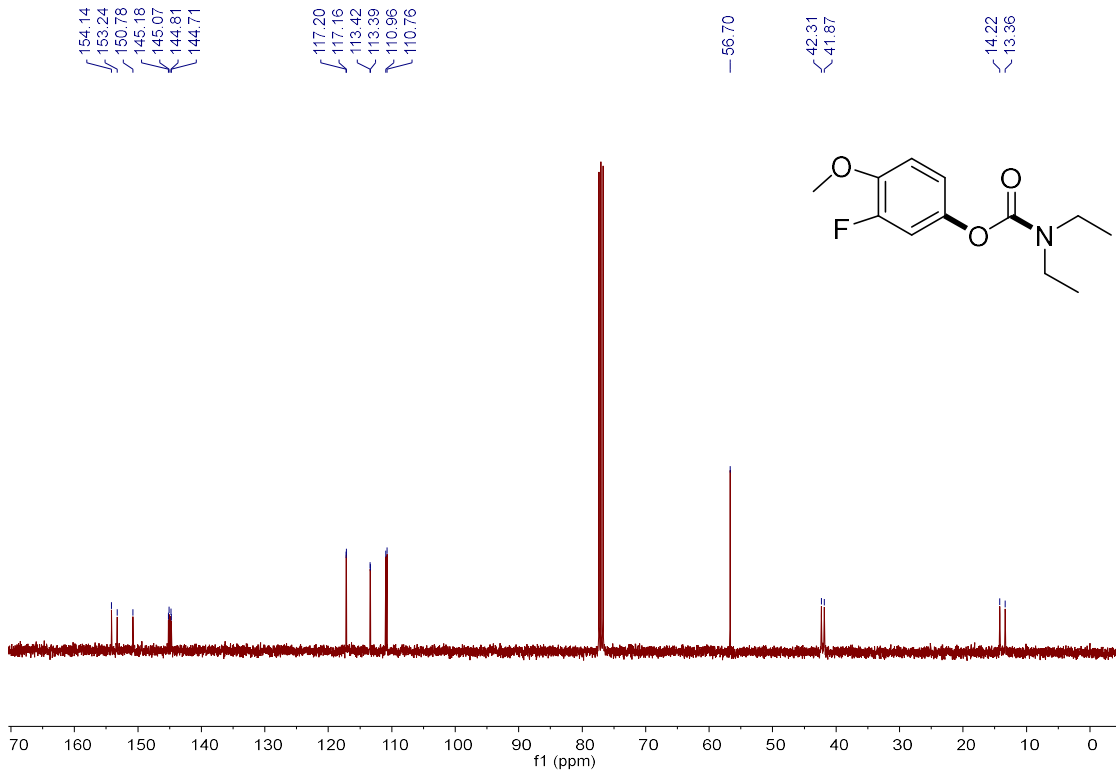

### 9H-fluoren-3-yl diethylcarbamate (3ma)

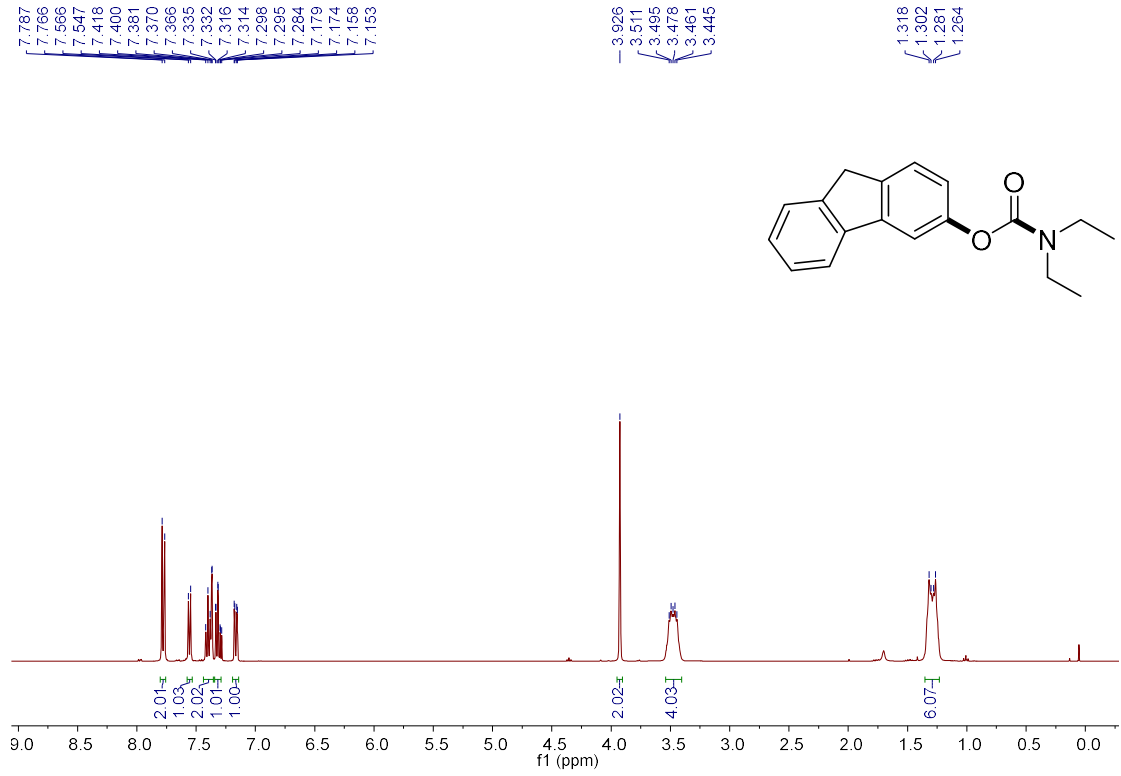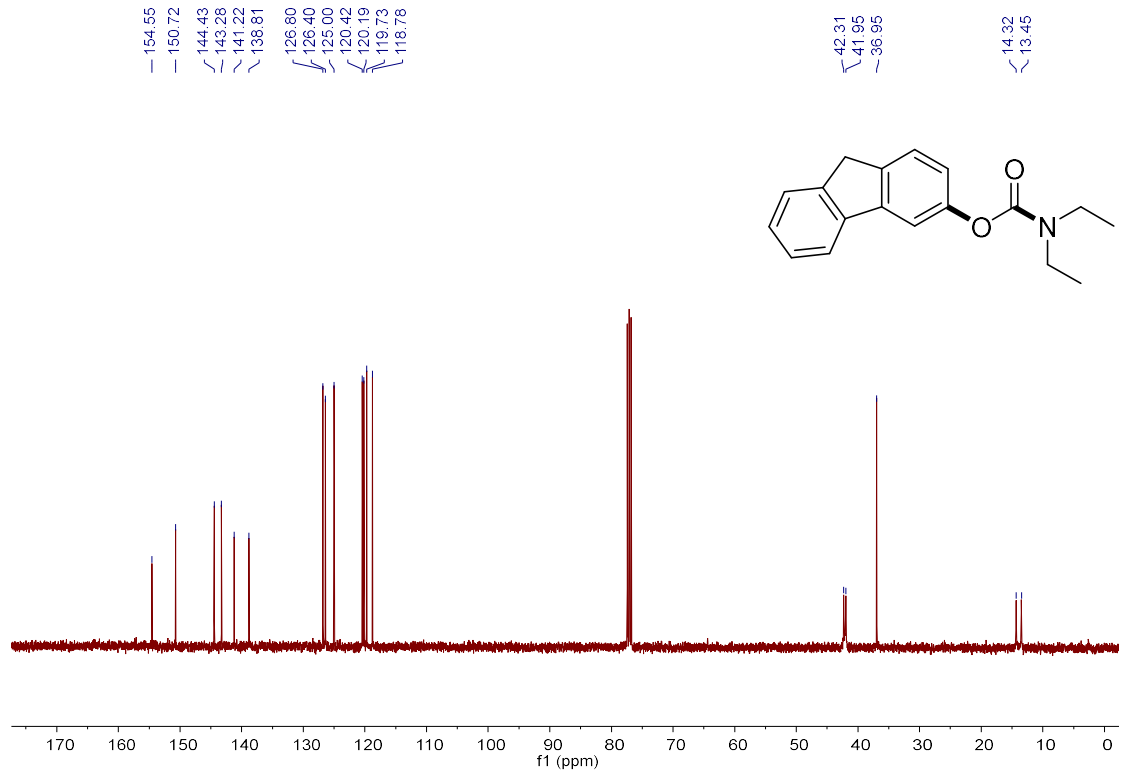

2,3-Dihydrobenzofuran-5-yl diethylcarbamate (3na)

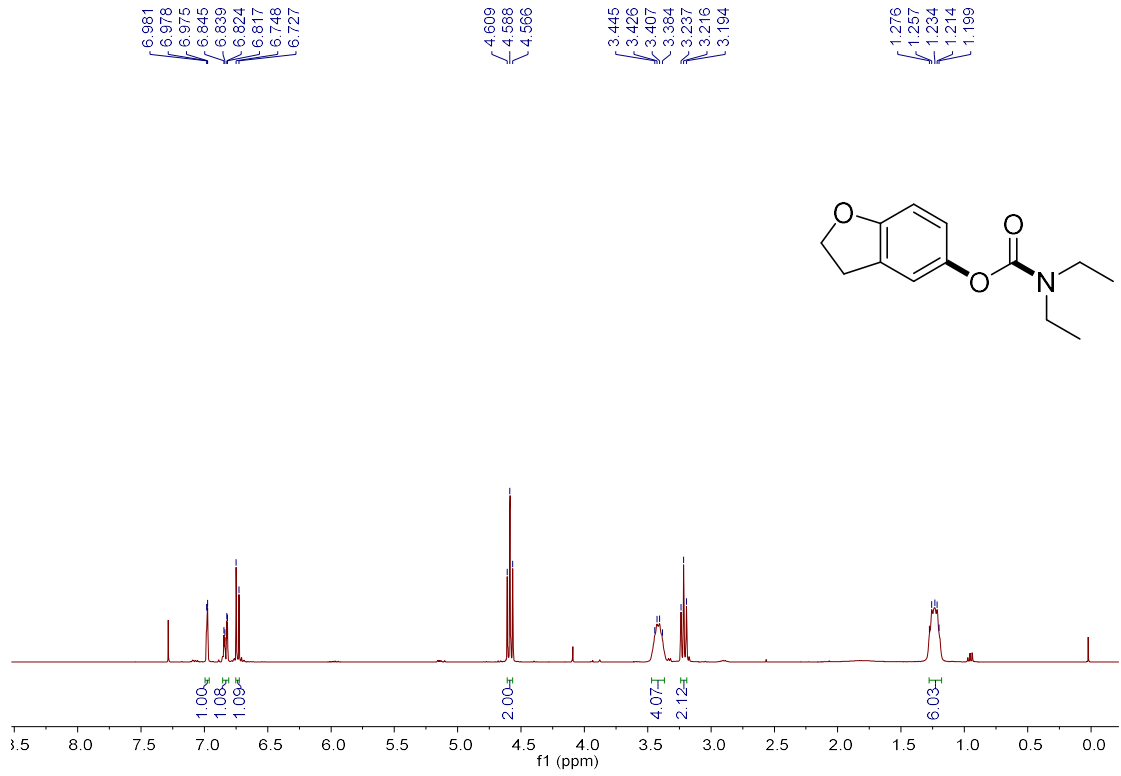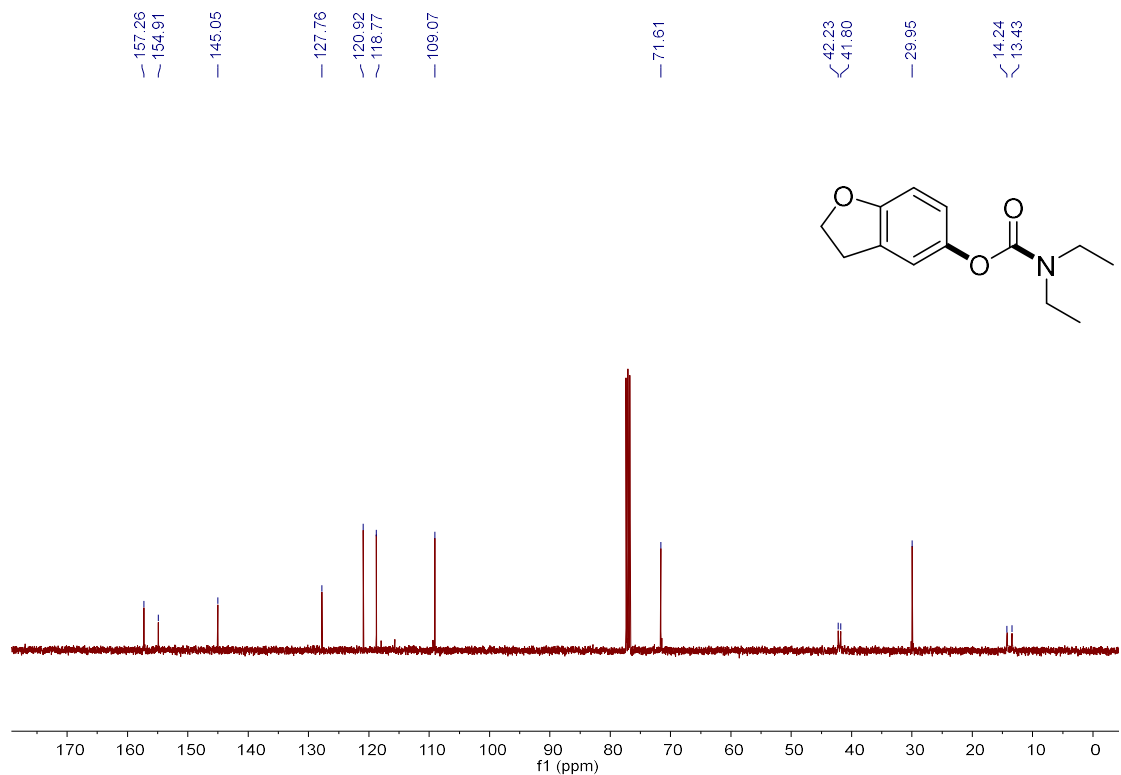

9-Oxo-9H-xanthen-2-yl diethylcarbamate (30a)

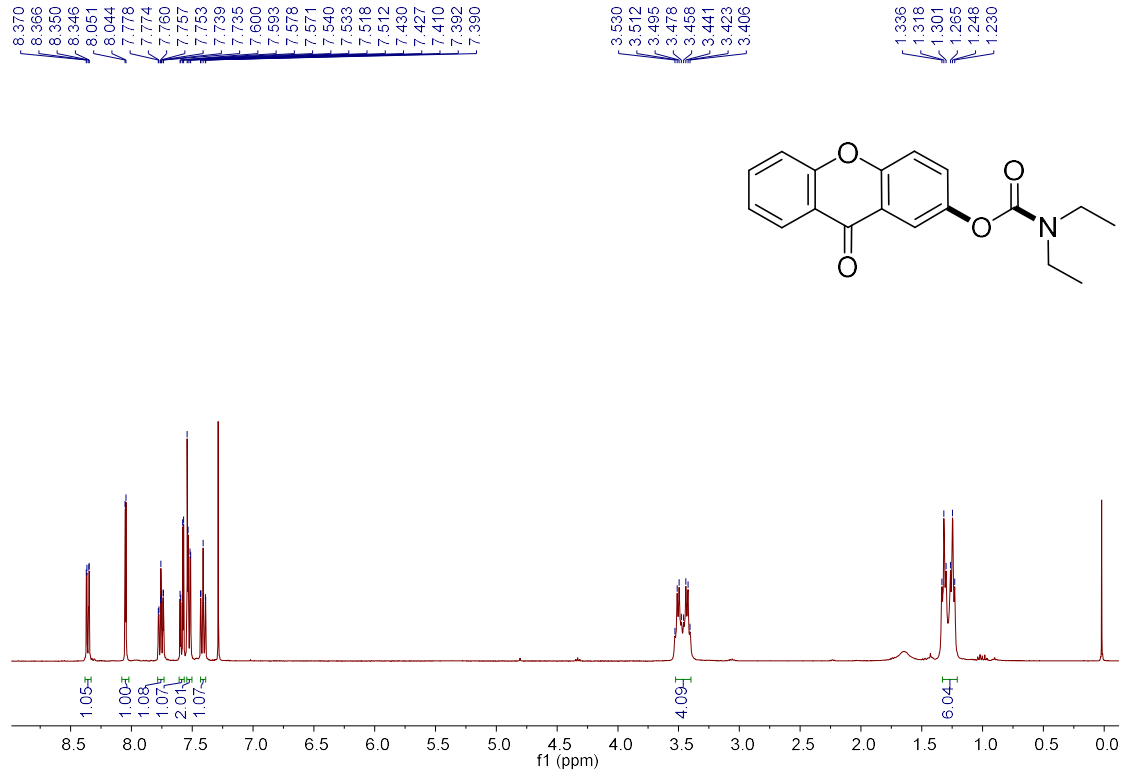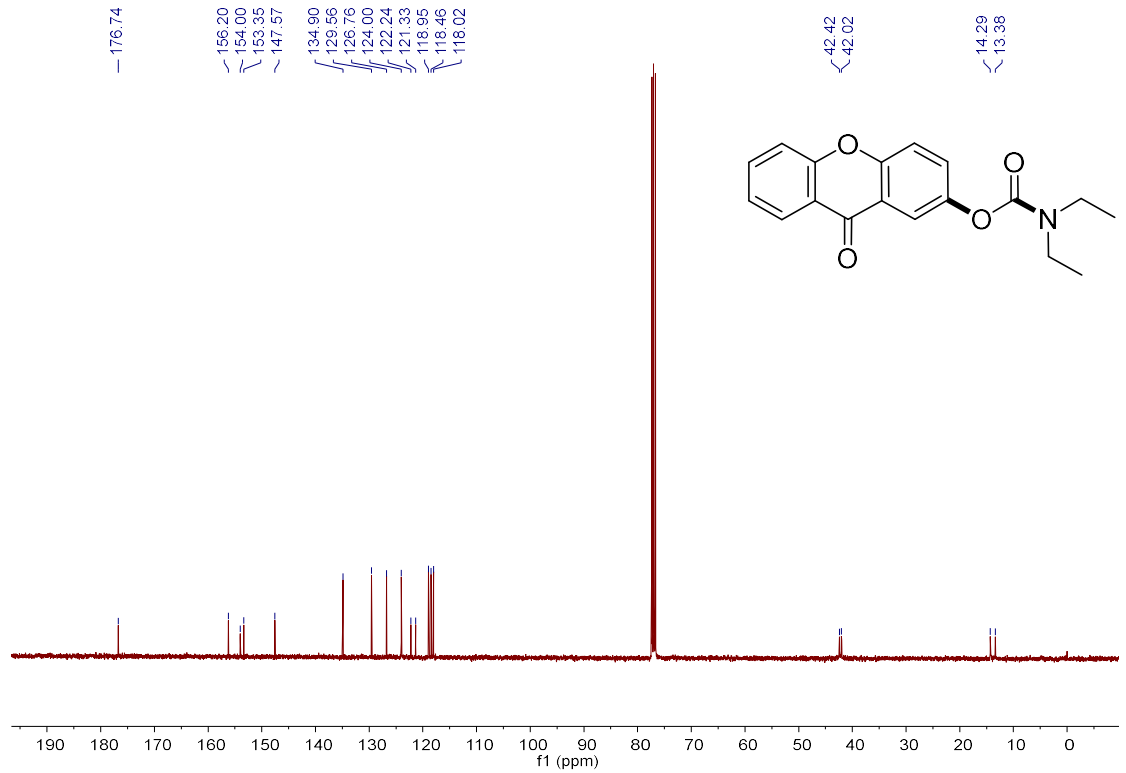

**Methyl 4-(4'-((diethylcarbamoyloxy)-[1,1'-biphenyl]-4-yl)-4-oxobutanoate (3pa)**

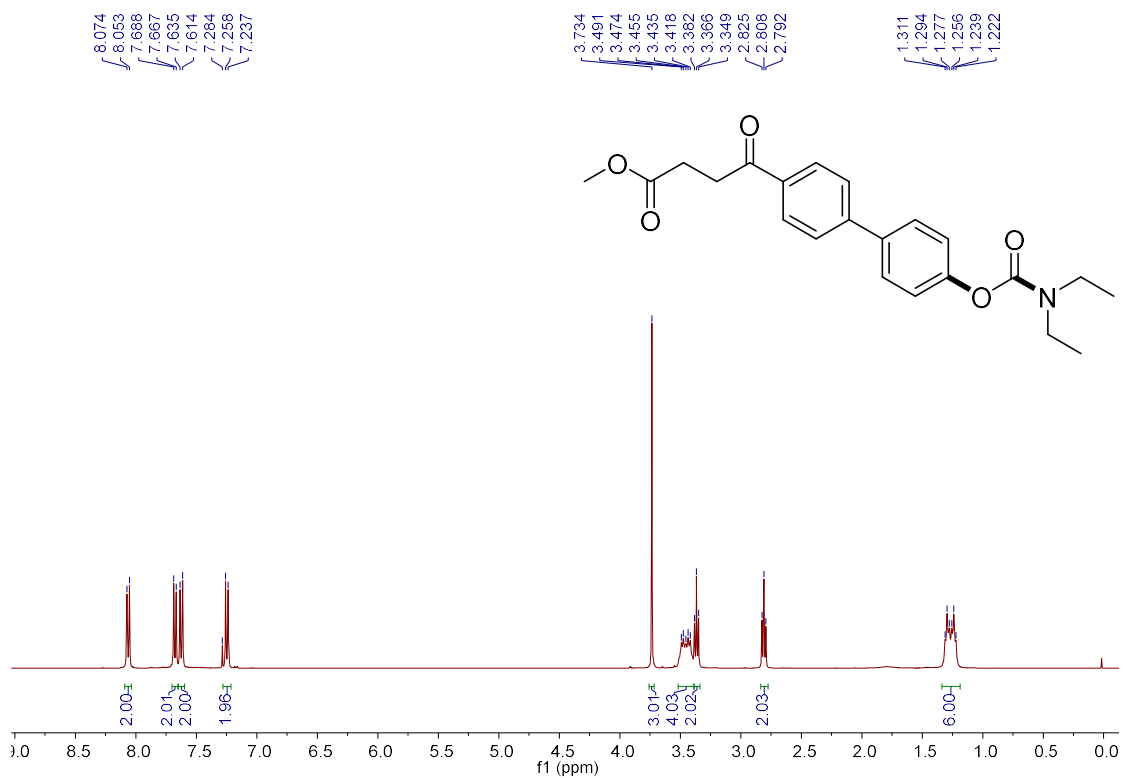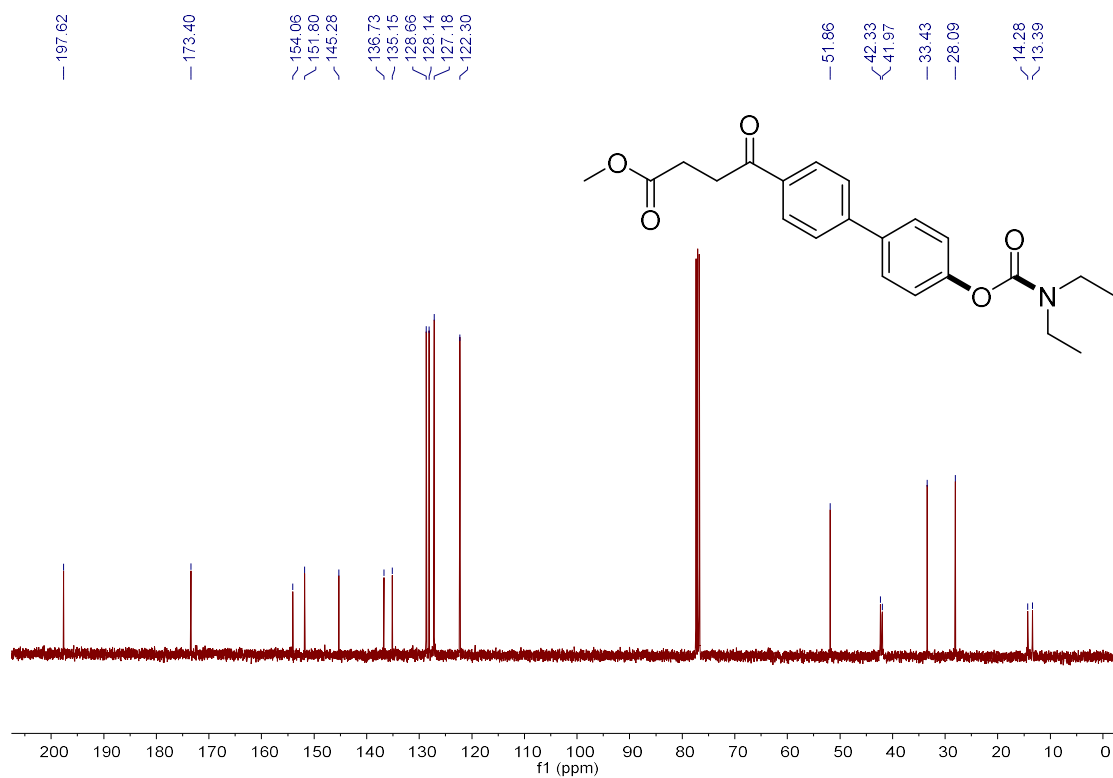

Methyl 5-(4-((diethylcarbamoyloxy)-2,5-dimethylphenoxy)-2,2-dimethylpentanoate (3qa)

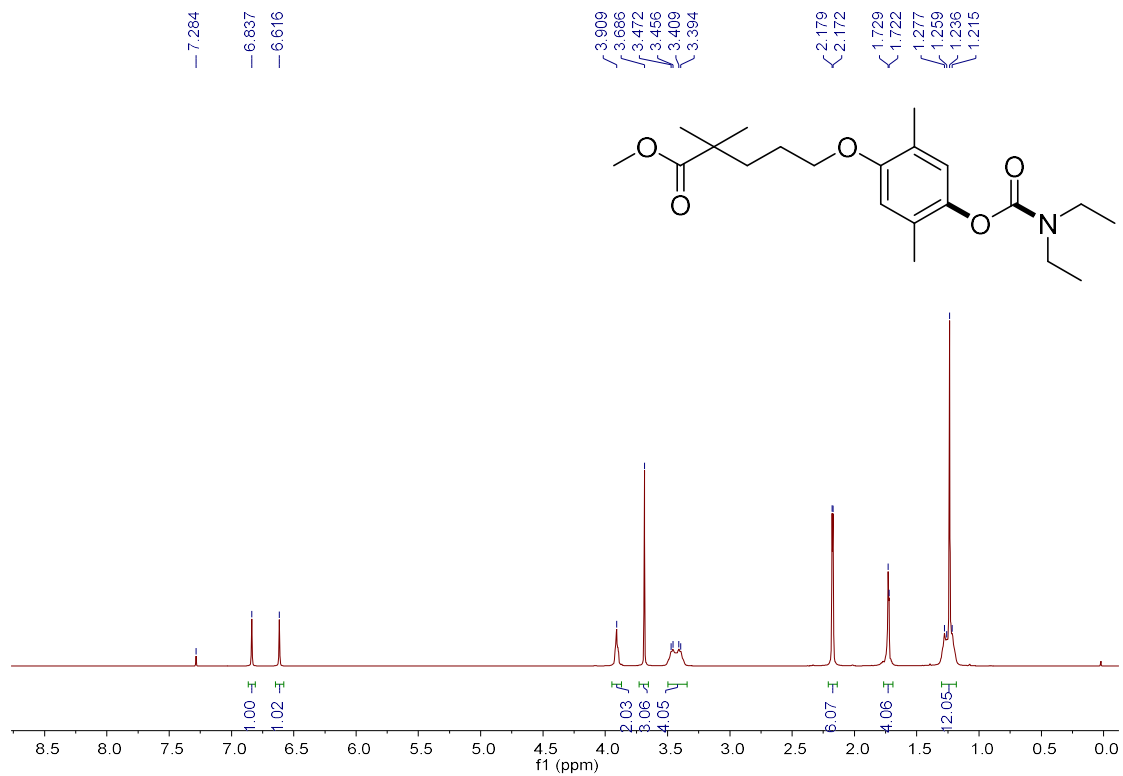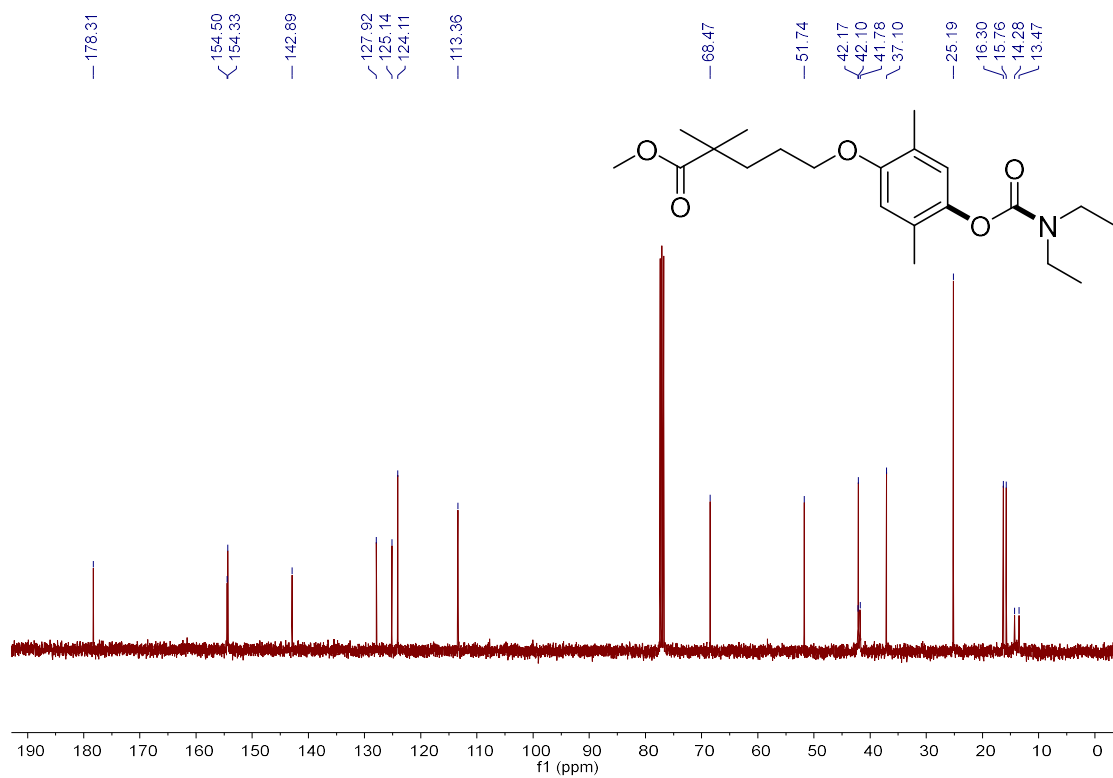



[1,1'-Biphenyl]-4-ol (4aa)

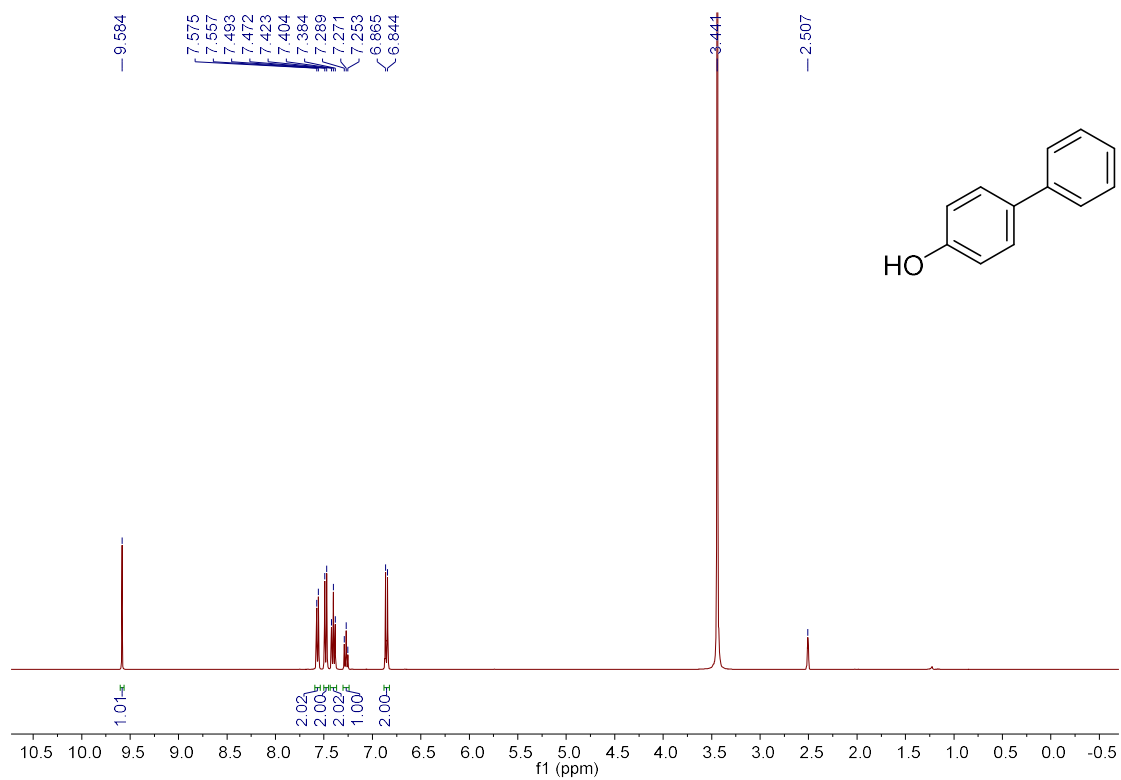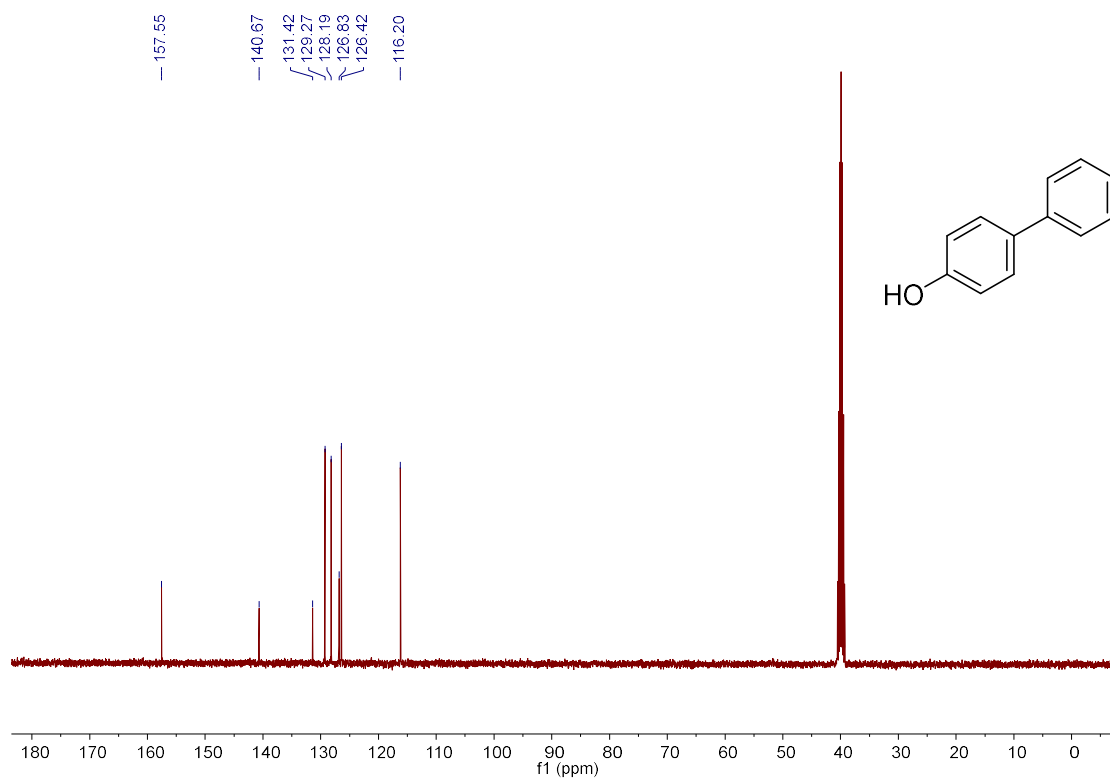

### 3-Benzoyl-[1,1'-biphenyl]-4-yl diethylcarbamate (4ab)

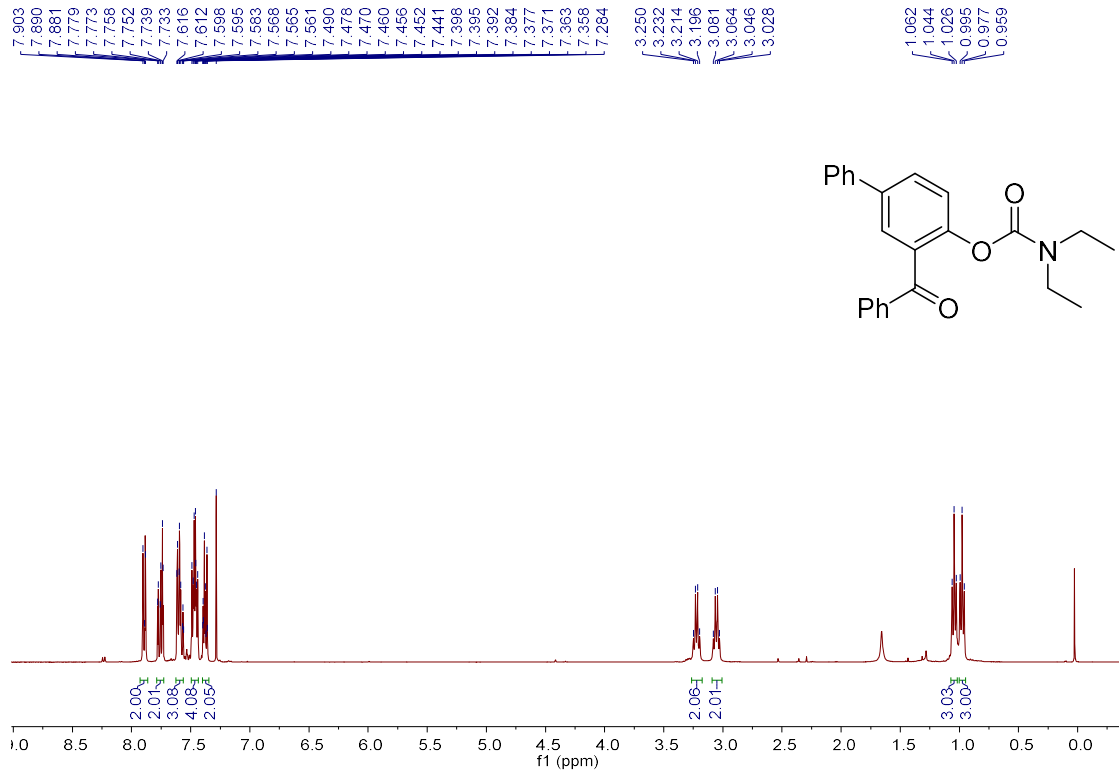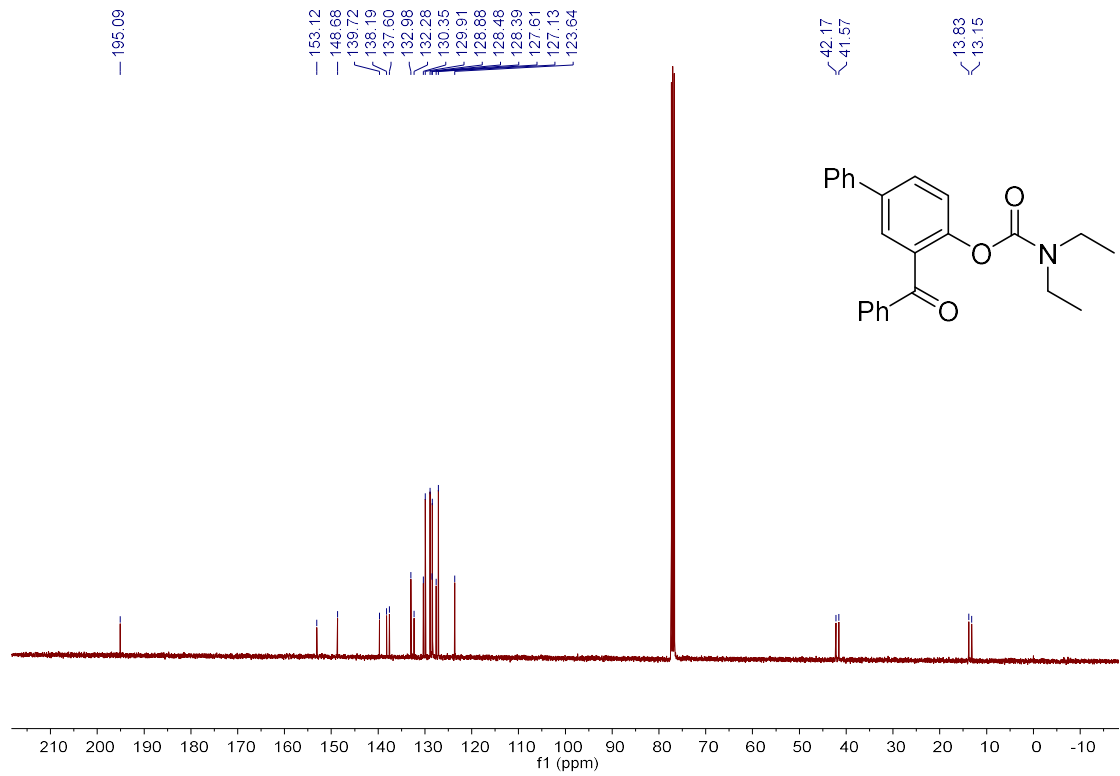

### 4-(2,2-Diphenylvinyl)-1'-biphenyl (5aa)

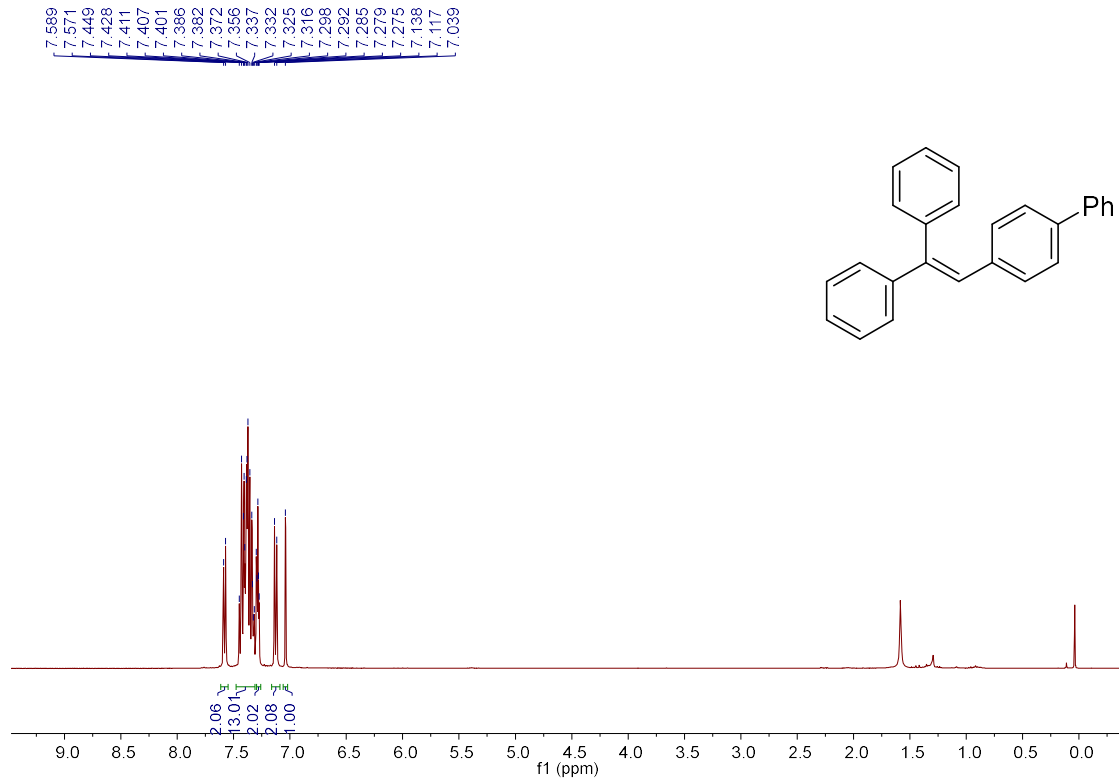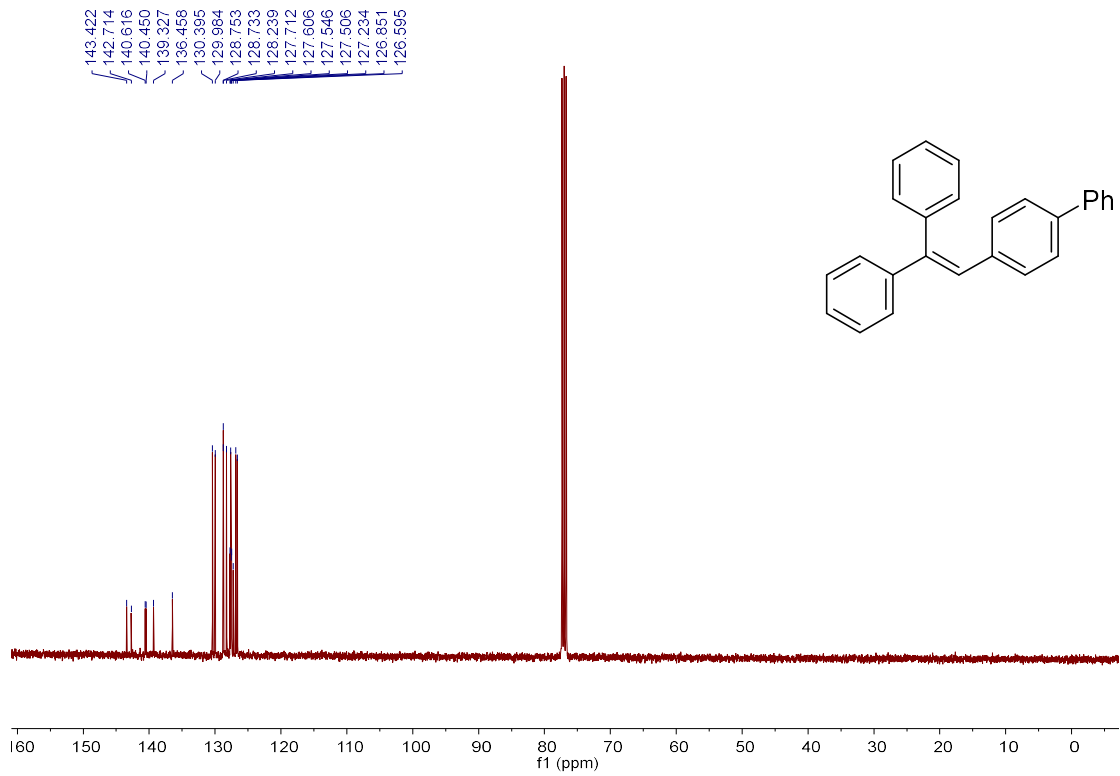

Supplement: d2cc06033g1.pdf [file d2cc06033g1.pdf]
